# Supplementary material
Source: PubMed Central journal article supplement (PMC3786785)
Supplement: NIHMS165717-supplement-1.pdf [file NIHMS165717-supplement-1.pdf]

## Supplementary Information Titles

|                                 |
|---------------------------------|
| <b>Journal:</b> Nature Medicine |
|---------------------------------|

|                              |                                                                                                                     |
|------------------------------|---------------------------------------------------------------------------------------------------------------------|
| <b>Article Title:</b>        | <b>Tumor cell-specific bioluminescence platform to identify stroma-induced changes to anti-cancer drug activity</b> |
| <b>Corresponding Author:</b> | Constantine S. Mitsiades                                                                                            |
|                              |                                                                                                                     |

| <b>Supplementary Item &amp; Number</b><br>(add rows as necessary) | <b>Title or Caption</b>                                                                                                                                                          |
|-------------------------------------------------------------------|----------------------------------------------------------------------------------------------------------------------------------------------------------------------------------|
| Supplementary Figure 1                                            | Features of CS-BLI for the specific measurement of tumor viability in the presence or absence of accessory cells.                                                                |
| Supplementary Figure 2                                            | CS-BLI confirms that co-culture with BMSCs confers protection against specific anti-tumor agents in MM cells.                                                                    |
| Supplementary Figure 3                                            | BMSCs confer protection against various agents in leukemia cell lines.                                                                                                           |
| Supplementary Figure 4                                            | Co-culture with BMSCs can protect solid tumor cell lines against anti-cancer agents.                                                                                             |
| Supplementary Figure 5                                            | Co-culture with primary BMSCs from MM patients provides tumor cell protection against specific anti-cancer agents.                                                               |
| Supplementary Figure 6                                            | Interaction of MM cells with BMSCs leads to distinct changes in transcriptional signatures indicative of the activation of key molecular pathways in tumor cell pathophysiology. |
| Supplementary Figure 7                                            | In vitro luciferase and kinase activity assays of reversine.                                                                                                                     |
| Supplementary Figure 8                                            | Imaging results over time for each reversine-treated and control mouse in the tumor experiment of MM.1S-GFP/luc cells injected i.v. vs. s.c.                                     |
| Supplementary Table 1                                             | Examples of transcripts significantly modulated in tumor cells by their interaction with stroma.                                                                                 |
| Supplementary Table 2                                             | Probes of a stroma - induced transcriptional signature associated with adverse clinical outcome in Dex-treated myeloma patients.                                                 |
