# Supplementary material
Source: PubMed Central journal article supplement (PMC3786785)
Supplement: NIHMS165717-supplement-2.pdf [file NIHMS165717-supplement-2.pdf]

## Tumor cell-specific bioluminescence platform to identify stroma-induced changes to anti-cancer drug activity

Douglas W. McMillin, Jake Delmore, Ellen Weisberg, Joseph M. Negri, D. Corey Geer, Steffen Klippel, Nicholas Mitsiades, Robert L. Schlossman, Nikhil C. Munshi, Andrew L. Kung, James D. Griffin, Paul G. Richardson, Kenneth C. Anderson, Constantine S. Mitsiades

### SUPPLEMENTAL MATERIAL AND METHODS

#### **Cells**

Luciferase (*luc*)-expressing cells evaluated in this study included: the MM cell lines MM.1S-GFP/*luc*, MM.1R-GFP/*luc* KMS-18-GFP/*Luc*, KMS-34-mCherry-*Luc*, OPM-1-mCherry-*Luc*, OPM-2-GFP/*luc*, INA-6-mCherry-*Luc*; the leukemia cell lines K562-*luc*-neo, and KU812F-*luc*-neo; the breast cancer cell line MDA-MB-231met-*luc*-neo; the melanoma line A375-*luc*-neo; and the anaplastic thyroid carcinoma cell line FRO-*luc*-neo. Cell lines were generated by retroviral transduction with the pGC-*gfp/luc* vector (kind gift of C.G. Fathman, Stanford University) for MM.1S, MM.1R, KMS-18 and OPM-2 cells; and the MSCV-*Luc*-neo retroviral vector for KU812F, K562, MDA-MB-231met and A375 cells. FRO cells were transfected with the luciferase expression vector pCMV-FSR vector (Genlantis). INA-6, OPM-1 and KMS-34 cells were transduced with a lentiviral mCherry-*luc* vector. Further details on individual transduction protocols and selection of *Luc*<sup>+</sup> cells have been previously described <sup>1</sup>. For molecular profiling studies, INA-6, OPM-1 and KMS-34 cells transduced with a lentiviral GFP-vector were a kind gift of R. Carrasco (Dana-Farber Cancer Institute). Stromal cells evaluated in this study included the human immortalized bone marrow stromal cell lines HS-5 (American Type Culture Collection, ATCC) and the KM101, KM103, KM104, and KM105 cells, provided by YT Tai (Dana-Farber Cancer Institute) and previously described by Harigaya and Handa <sup>2</sup>. Patient stromal cells were isolated by culturing adherent cells from bone marrow aspirates for >14 d. Co-cultures of tumor cells with stromal cells were grown in RPMI1640 (Mediatech, Inc) for myeloma or leukemia cell lines) or DMEM (Mediatech, Inc.; for melanoma, breast cancer and thyroid cell lines) media supplemented with 10% FBS, 100 U ml<sup>-1</sup> penicillin and 100 µg ml<sup>-1</sup> streptomycin.

#### **Reagents**

Bortezomib (PS-341) was provided by Millennium Pharmaceuticals. Doxorubicin, dexamethasone, MTT, and Ara-C were purchased from Sigma-Aldrich (St. Louis, MO). Apo2.7

antibody was purchased from Beckman Coulter/Immunotech. Imatinib and Nilotinib were kindly provided by Novartis Pharma AG. 2-(4-morpholinoanilino)-6-cyclohexylaminopurine (reversine) was purchased from Cayman Chemical. Duration of treatment was 24 h for PS-341; 48 h for Doxo, AraC, imatinib, nilotinib, and 72 h for Dex and reversine, unless otherwise stated. IL-6 and IL-6R blocking antibodies were purchased from R & D Systems.

### ***Cell survival assays***

Viability of cells treated with reversine, alone or combined with other agents, was assessed by using 3-(4,5-dimethylthiazol-2-yl)-2,5-diphenyl tetrasodium bromide (MTT, Chemicon International) dye absorbance or CellTiterGlo (CTG; Promega). For MTT analysis, cells were pulsed with 1:10 the culture volume of 5 mg ml<sup>-1</sup> MTT to each well for the last 4 h of culture, followed by 1.5-3 fold the culture volume of isopropanol containing 0.04 N HCl. Absorbance was measured at 570 and 630 nm using a spectrophotometer (Molecular Devices Corp., Sunnyvale CA). For CTG analysis, equal volume of reconstituted CTG reagent was added to cultures, incubated at 37°C for 30 min, and luminescence read using a Luminoskan luminometer (Labsystems). Anti-IL-6 and IL-6 receptor neutralizing antibodies were used at 1 µg mL<sup>-1</sup> (R&D Systems).

### ***Flow cytometry-based drug sensitivity testing in tumor-stromal co-cultures***

Tumor cell viability in the presence vs. absence of stromal cells was evaluated by flow cytometry. After incubation with drug or vehicle, MM.1S-GFP/luc MM cells were stained with Apo2.7 (BD Biosciences) to detect apoptotic cells. GFP<sup>+</sup> MM cells were gated to distinguish them from GFP<sup>-</sup> stromal cells in the co-cultures. The ratio of Apo2.7-positive cells in the GFP<sup>+</sup> compartment of the drug-treated vs. vehicle control provided a quantified expression of viable MM cells in response to drug treatment, both in the context of drug treatment of MM cells alone and in the context of MM cell co-culture with BMSCs.

### ***In vitro luciferase and kinase activity assays***

For *in vitro* luciferase activity assay, luciferin substrate solution was prepared by dissolving firefly diluent (Sigma Aldrich) in ddH<sub>2</sub>O supplemented with 100 nM Adenosine 5'Triphosphate (ATP, Sigma Aldrich). Serial dilutions of Reversine (Cayman Chemicals) and Resveratrol (Sigma Aldrich) were prepared in the luciferin solution. Firefly luciferase (Sigma Aldrich) was reconstituted in Glycine-Tris buffer supplemented with 10mM EDTA (Boston BioProducts) and 100 mM MgSO<sub>4</sub> (Sigma Aldrich). 1 µL of a 500 µg mL<sup>-1</sup> stock of luciferase was seeded in each

well of a 384-well optical bottom plate (Nunc). 50  $\mu$ L of luciferin solution with a range of Reversine or Resveratrol concentrations were then added. Immediately after the addition of the substrate solution, luminescence was measured using a Luminoskan Ascent Luminometer with Ascent Software (Labsystems).

In vitro kinase activity was screened with 500 nM of reversine (in 1% DMSO) and ATP, using the Invitrogen Z'-LYTE™ kinase assay platform (Invitrogen). In summary, in the first reaction the kinase transfers the gamma-phosphate of ATP to a single tyrosine, serine or threonine residue in a synthetic FRET-peptide. In the secondary reaction, a site-specific protease recognizes and cleaves non-phosphorylated FRET-peptides. To calculate kinase activity, the ratio of donor emission to acceptor emission after excitation of the fluorophore at 400nm was compared.

### **Gene expression profiling and analyses**

The transcriptional profile of MM cells co-cultured with stromal cells vs. when cultured alone was characterized by oligonucleotide microarray analysis, using the human U133 plus 2.0 Affymetrix GeneChip, according to previously described protocols for total RNA extraction and purification; cDNA synthesis; *in vitro* transcription reaction for production of biotin-labeled cRNA; hybridization of cRNA with U133plus2.0 Affymetrix gene chips; and scanning of image output files. Microarray data are available from the Gene Expression Omnibus database (<http://www.ncbi.nlm.nih.gov/geo>) under accession codes GSE# (pending). Analysis of gene expression datasets included filtering of upregulated or downregulated transcripts based on conventional criteria for statistical significance, as well as by hierarchical & functional clustering algorithms<sup>5,7-9</sup>, and analysis of transcriptional signatures of pathway activation status. Specifically, for each experimental condition of our study, biotin-labeled cRNA was hybridized in duplicate U133 plus 2.0 Affymetrix chips. Scanned image output files were analyzed using DNA-Chip Analyzer (dChip)<sup>10</sup>, including conversion to DCP files, normalization and modeling, and averaging of duplicate chips according to standard parameters recommended by the software. For each cell line, the gene expression profile in the presence of stromal cells was compared to the profile of the same cell line cultured in the absence of stromal cells, and filtering of upregulated or downregulated transcripts was based on conventional criteria for statistical significance incorporated in the software (e.g. >1.2 fold change and an absolute change in the signal of a probe by >100). Probes were then further filtered to identify those which have  $\geq 2$ -fold change between a MM cell line co-cultured with BMSCs vs. the same cell line cultured alone and exhibit this change in at least 1 of the cell lines tested. Supervised hierarchical clustering of the dataset

according to the list of transcripts significantly modulated in at least one cell line was then performed using dChip.

Functional clustering of transcripts modulated by tumor-stromal interaction: Transcripts modulated by  $\geq 1.2$  fold and by absolute signal change of  $\geq 100$  were further curated to identify clusters of genes with common functional roles. In particular, we sought to identify functional groups in which multiple transcripts may individually show even modest expression changes, but which collectively represent significant higher-order shifts in activity of key pathways responsible for phenotypic changes triggered by tumor-stromal interactions. The curation of the modulated transcripts into functional groups was performed based on: prior literature in the MM field and other tumor models; functional annotations present in the Ingenuity Pathway Analysis database (Ingenuity Systems Inc.) and dChip; as well as information provided by the unCHIP Cross-reference tool for microarray data (Children's Hospital Informatics Program, <http://unchip.org:8080/>). For this functional clustering analyses, we focused on diverse pathways implicated in tumor pathophysiology, including cytokine, growth factor and/or chemokine signaling; oncogenic transformation; resistance to apoptosis; Ras superfamily function; heat shock protein and chaperone function; ubiquitin/proteasome pathway; transcription factor networks; histone deacetylase and epigenetic regulation; cell cycle regulation; DNA repair and drug resistance; tumor cell interaction with the microenvironment, including adhesive interactions; ribosomal function; and/or mitochondrial genes. For each of these gene clusters and each cell line, the average value ( $\pm$  95% confidence limit) of the difference in absolute expression signal in MM cells cultured in the presence vs. absence of BMSCs was calculated.

**Pathway activation status analyses:** Transcripts previously shown to reflect the activation state of pathways pertinent to tumor cell proliferation, survival drug resistance and other functional endpoints of tumor-stromal interactions were evaluated for differences in expression, for each of the indicated MM cell lines cultured in the presence vs. absence of BMSCs in vitro. As in the previously mentioned functional clustering analyses, the pathway activation status analyses sought to evaluate the effect triggered by tumor-stromal interactions on functional groups of multiple transcripts which individually may show only modest expression changes, but which collectively represent significant higher-order shifts in activity of key pathways responsible for phenotypic changes triggered by tumor-stromal interactions. Furthermore, this analysis allowed us to evaluate the activation state of known pathways in MM cell lines which respond to stromal co-culture in the absence of drug treatment with increased numbers of viable cells vs. those which do

not. The activation status of signaling cascades are not only determined by the expression of individual members of the cascade, but also by translational regulation and post-translational modifications. Although these are not revealed by gene expression profiling, the overall activity of the pathway can be evaluated by the study of downstream target genes. For this analysis, we focused on a compendium of signatures previously determined to reflect the status of the ribosomal and proteasome pathways (as included in the Gene Set Enrichment Analysis (GSEA) database <http://www.broad.mit.edu/GSEA> and <sup>11,12</sup>); Akt activation signature derived as the human orthologs of probes upregulated in tumors of the MPAKT mouse model <sup>13</sup>; Ras activation signature derived as the human orthologs of probes upregulated in Ras-transformed mouse fibroblasts <sup>14</sup>; signature of NF- $\kappa$ B activated genes identified by Shaffer et al. <sup>15</sup> or a signature combining the NF- $\kappa$ B target genes identified by Shaffer et al. <sup>15</sup> and Keats et al <sup>16</sup>; signatures of self renewal implicated in normal and/or cancer stem cell biology, including myc <sup>17,18</sup>, hTERT <sup>19</sup>, Hedgehog <sup>20</sup>, Notch <sup>21</sup> and a transcriptional signature of genes upregulated in undifferentiated human embryonic stem cells <sup>22</sup> (as included in the GSEA database); as well as the U133 plus 2.0 probes corresponding to the IRF4 target genes identified by Shaffer et al <sup>23</sup>. We also studied the transcriptional signature of genes downregulated by p53 function <sup>24</sup> (as identified with the use of Ingenuity PathwayAnalysis); a transcriptional signature previously reported to correlate with unfavorable clinical prognosis of MM patients <sup>25</sup>; a signature of genes overexpressed in angiogenic vs. non-angiogenic tumors, as identified by Hu et al. <sup>26</sup>; 3 previously validated gene signatures (as included in the GSEA database) shown to be upregulated under hypoxic condition <sup>27-29</sup>; and a transcriptional signature of HIF-1 $\alpha$  target genes<sup>30</sup> (again from the GSEA database). The probes corresponding to each of these signatures were used to filter the dataset (either using the Ingenuity Pathway Analysis software or Microsoft Excel) and the outputs were processed to calculate the average value (+/- 95% confidence limit) of the difference in absolute expression signal in MM cells cultured in the presence vs. absence of BMSCs for each transcriptional signature and each cell line; as well as the average expression signal of all the genes of each signature (+/- 95% confidence limit) for each experimental condition of each cell line.

**Transcriptional signature of stroma-responsive genes and relationship with clinical outcome.** Gene expression data of stroma-responsive cell lines cultured in the presence or absence of stroma were normalized to the median probe intensity of the microarray with median brightness of the dataset using dChip. A transcriptional index of MM cell response to stroma was identified, based on transcripts upregulated (by >100% compared to control) and satisfying filtering criteria (absolute signal change of  $\geq 100$ ) in at least one of the cell lines tested. Common

probes of that signature between the U133 plus 2.0 and the U133A microarray chips were utilized to filter the log<sub>2</sub>-transformed and median centered gene expression dataset of tumor cells from MM patients enrolled in a randomized phase III clinical trial comparing treatment with bortezomib vs. dexamethasone of relapsed/refractory MM <sup>31,32</sup>. After filtering based on the 1000 probes for non-immunoglobulin transcripts with the highest values of the 90<sup>th</sup> percentile of expression in the evaluable patients of this trial, the transcriptional index of stromal responsive genes was calculated as the average of the log<sub>2</sub>-transformed and median centered values for each probe of the signature. Patients were then classified as having high (top quartile of expression) vs. low (bottom 3 quartiles) expression of stroma-responsive genes and Kaplan-Meier survival analyses were performed for each arm of the randomized trial using SPSS 16.0. Concordant results were also obtained with alternative versions of the transcriptional index of stromal responsive genes (unpublished data).

**SUPPLEMENTAL FIGURE LEGENDS**

**SUPPLEMENTAL FIGURE 1. Features of CS-BLI for the specific measurement of tumor viability in the presence or absence of accessory cells.** (a) Luc<sup>+</sup> MM.1S cells plated at increasing cell numbers had a linear correlation of viable MM cells both in the presence or absence of HS-5 stromal cells. (b, c) MTT viability assessment yielded results consistent in MM.1S parental cells and transduced cells expressing GFP/luc when treated with Doxo or PS-341 in the absence of stromal cells. (d) MM.1S-GFP/luc cells yielded consistent results when viability was measured by CellTiterGlo (CTG) or CS-BLI. Using flow cytometry, MM.1S-GFP/luc cells were exposed to Doxo in the presence and absence of GFP<sup>-</sup> stromal cells. (e) GFP<sup>+</sup> MM cells had fewer non-viable (Apo2.7<sup>+</sup>) cells in the presence vs. absence of BMSCs.

**SUPPLEMENTAL FIGURE 2. CS-BLI confirms that co-culture with BMSCs confers protection against specific anti-tumor agents in MM cells.** (a, c, e) MM.1S-GFP/luc and (b, d, f) MM.1R-GFP/luc cells were plated in the presence or absence of HS-5 BMSCs (10,000 cells per well) and treated with (a, b) Dex, (c, d) Doxo or (e, f) the proteasome inhibitor bortezomib (PS-341). BMSCs confer to MM.1S cells protection against Dex and Doxo, but not PS-341. BMSCs have little effect on the Dex-resistant cell line, MM.1R, in response to Dex treatment, but confer protection against Doxo. In addition, BMSCs confer no protection to treatment of MM.1R cells with PS-341.

**SUPPLEMENTAL FIGURE 3. BMSCs confer protection against various agents in leukemia cell lines.** (a, c, e, g) Luc<sup>+</sup> KU812F and (b, d, f, h) K562 leukemia cells were plated in the presence or absence of HS-5 BMSCs (10,000 per well) and treated with (a, b) Ara-C, (c, d) imatinib, (e, f) Doxo or (g, h) nilotinib. BMSCs confer protection against AraC, Imatinib and nilotinib, but not Doxo in KU812F cells. For K562 cells, BMSCs confer protection against Ara-C, but not imatinib, Doxo or nilotinib.

**SUPPLEMENTAL FIGURE 4. Co-culture with BMSCs can protect solid tumor cell lines against anti-cancer agents.** (a, b) Luc<sup>+</sup> MDA-MB-231met, (c, d) A375 and (e, f) FRO cells were plated with or without HS-5 BMSCs (10,000 cells per well), treated the following day, and incubated for an additional 48 h. BMSCs confer modest protection against both (a) AraC and (b) Doxo in MDA-MB-231-met cells. BMSCs provided a considerable level of protection to (c) AraC, but not against (d) Doxo in A375 cells. Lastly, BMSCs confer no protection against (e) AraC, but confer modest protection against (f) Doxo in FRO cells.

**SUPPLEMENTAL FIGURE 5. Co-culture with primary BMSCs from MM patients provides tumor cell protection against specific anti-cancer agents.** MM.1S-GFP/luc were plated in the presence or absence of BMSCs isolated from two different MM patients (10,000 per well) and treated with (a) Dex, (b) Doxo or (c) PS-341. Both patient BMSC samples confer protection against Dex and Doxo, but not PS-341 in MM cells.

**SUPPLEMENTAL FIGURE 6. Interaction of MM cells with BMSCs leads to distinct changes in transcriptional signatures indicative of the activation of key molecular pathways in tumor cell pathophysiology.** Transcripts previously shown to reflect the activation state of the indicated pathways were evaluated for differences in expression in each MM cell line, in the presence vs. absence of BMSCs *in vitro*. For each transcriptional signature, the average value (+/- 95% confidence limit) of absolute expression signal in MM cells for each cell line and each experimental condition (i.e. culture in the presence vs. absence of BMSCs) is shown. Asterisks (\*) denote statistically significant ( $p < 0.05$ ) change in value of a transcriptional signature in the presence vs. absence of BMSCs.

**SUPPLEMENTAL FIGURE 7. In vitro luciferase and kinase activity assays of reversine.** (a) *In vitro* luciferase activity was screened in the presence of reversine. Luciferase was reconstituted in Glycine-Tris buffer plus EDTA and MgSO<sub>4</sub>, with the addition of ATP and increasing concentrations of reversine or the positive control, resveratrol. Luminescence was detected immediately after the addition of the substrate ( $n = 4$ ). Reversine (up to 100  $\mu$ M) did not block luciferase activity. (b) Using the Z'-Lyte™ kinase assay, select kinases were screened for activity in the presence of 500 nM reversine. Inhibition of activity was observed against a select subset of kinases, including Auroras, JAK2, and SRC, but not other kinases important for MM growth and survival, including AKT1, 2, 3, FGFR3, GSK3A or B.

**SUPPLEMENTAL FIGURE 8. Imaging results over time for each reversine-treated and control mouse in the tumor experiment of MM.1S-GFP/luc cells injected i.v. vs s.c.** (a) Imaging results are shown utilizing the IVIS Xenogen camera system following i.p. injection of luciferin substrate in *SCID-Beige* mice bearing diffuse lesion tumors. (b) Imaging results are shown utilizing the IVIS Xenogen camera system following i.p. injection of luciferin substrate in *SCID-Beige* mice bearing s.c. tumors. Graphical results for each model were analyzed using



Living Image software and displayed utilizing both high sensitivity settings as well as lower sensitivity settings to display tumors.

## **SUPPLEMENTAL TABLE LEGENDS**

**SUPPLEMENTAL TABLE 1. Examples of transcripts significantly modulated in tumor cells by their interaction with stroma.** The ratio of change in expression in the presence compared to absence of stromal cells is presented for groups of transcripts related to diverse cell functions (cell signaling for proliferation/survival, resistance to apoptosis or drug treatments, DNA repair, heat shock protein and molecular chaperones, ubiquitin-proteasome pathway, histone regulation or chromatin remodeling, microenvironmental interactions and ribosomal function). The ratio of stroma-induced change in expression of each transcript is depicted for each cell line according to a color-coded scale.

**SUPPLEMENTAL TABLE 2. Probes of a stroma - induced transcriptional signature associated with adverse clinical outcome in Dex-treated myeloma patients.** Individuals with MM in whom tumor cells have high averages levels of log<sub>2</sub>-median centered signal intensity values for these probes have adverse clinical outcome with Dex-treatment. Alternative versions of the transcriptional index of stromal responsive genes have also yielded concordant conclusions of association with clinical outcome.

**SUPPLEMENTAL REFERENCES**

1. Armstrong, S.A. et al. Inhibition of FLT3 in MLL. Validation of a therapeutic target identified by gene expression based classification. *Cancer Cell* **3**, 173-83 (2003).
2. Harigaya, K. & Handa, H. Generation of functional clonal cell lines from human bone marrow stroma. *Proc Natl Acad Sci U S A* **82**, 3477-80 (1985).
3. Moalli, P.A., Pillay, S., Weiner, D., Leikin, R. & Rosen, S.T. A mechanism of resistance to glucocorticoids in multiple myeloma: transient expression of a truncated glucocorticoid receptor mRNA. *Blood* **79**, 213-22 (1992).
4. Mitsiades, C.S. et al. TRAIL/Apo2L ligand selectively induces apoptosis and overcomes drug resistance in multiple myeloma: therapeutic applications. *Blood* **98**, 795-804 (2001).
5. Mitsiades, C.S. et al. Inhibition of the insulin-like growth factor receptor-1 tyrosine kinase activity as a therapeutic strategy for multiple myeloma, other hematologic malignancies, and solid tumors. *Cancer Cell* **5**, 221-30 (2004).
6. Chauhan, D. et al. Multiple myeloma cell adhesion-induced interleukin-6 expression in bone marrow stromal cells involves activation of NF-kappa B. *Blood* **87**, 1104-12 (1996).
7. Mitsiades, N. et al. Molecular sequelae of proteasome inhibition in human multiple myeloma cells. *Proc Natl Acad Sci U S A* **99**, 14374-9 (2002).
8. Mitsiades, N. et al. The proteasome inhibitor PS-341 potentiates sensitivity of multiple myeloma cells to conventional chemotherapeutic agents: therapeutic applications. *Blood* **101**, 2377-80 (2003).
9. Mitsiades, C.S. et al. Transcriptional signature of histone deacetylase inhibition in multiple myeloma: biological and clinical implications. *Proc Natl Acad Sci U S A* **101**, 540-5 (2004).
10. Li, C. & Wong, W.H. Model-based analysis of oligonucleotide arrays: Expression index computation and outlier detection. *Proc Natl Acad Sci U S A* **98**, 31-36 (2001).
11. Subramanian, A., Kuehn, H., Gould, J., Tamayo, P. & Mesirov, J.P. GSEA-P: a desktop application for Gene Set Enrichment Analysis. *Bioinformatics* **23**, 3251-3 (2007).
12. Subramanian, A. et al. Gene set enrichment analysis: a knowledge-based approach for interpreting genome-wide expression profiles. *Proc Natl Acad Sci U S A* **102**, 15545-50 (2005).
13. Majumder, P.K. et al. Prostate intraepithelial neoplasia induced by prostate restricted Akt activation: the MPAKT model. *Proc Natl Acad Sci U S A* **100**, 7841-6 (2003).
14. Vasseur, S. et al. Gene expression profiling by DNA microarray analysis in mouse embryonic fibroblasts transformed by rasV12 mutated protein and the E1A oncogene. *Mol Cancer* **2**, 19 (2003).
15. Shaffer, A.L. et al. Signatures of the immune response. *Immunity* **15**, 375-85 (2001).
16. Keats, J.J. et al. Promiscuous mutations activate the noncanonical NF-kappaB pathway in multiple myeloma. *Cancer Cell* **12**, 131-44 (2007).
17. Zeller, K.I., Jegga, A.G., Aronow, B.J., O'Donnell, K.A. & Dang, C.V. An integrated database of genes responsive to the Myc oncogenic transcription factor: identification of direct genomic targets. *Genome Biol* **4**, R69 (2003).
18. Yu, D., Cozma, D., Park, A. & Thomas-Tikhonenko, A. Functional validation of genes implicated in lymphomagenesis: an in vivo selection assay using a Myc-induced B-cell tumor. *Ann N Y Acad Sci* **1059**, 145-59 (2005).
19. Lindvall, C. et al. Molecular characterization of human telomerase reverse transcriptase-immortalized human fibroblasts by gene expression profiling: activation of the epiregulin gene. *Cancer Res* **63**, 1743-7 (2003).
20. Ingram, W.J., Wicking, C.A., Grimmond, S.M., Forrest, A.R. & Wainwright, B.J. Novel genes regulated by Sonic Hedgehog in pluripotent mesenchymal cells. *Oncogene* **21**, 8196-205 (2002).

21. Nguyen, B.C. et al. Cross-regulation between Notch and p63 in keratinocyte commitment to differentiation. *Genes Dev* **20**, 1028-42 (2006).
22. Bhattacharya, B. et al. Gene expression in human embryonic stem cell lines: unique molecular signature. *Blood* **103**, 2956-64 (2004).
23. Shaffer, A.L. et al. IRF4 addiction in multiple myeloma. *Nature* **454**, 226-31 (2008).
24. Kannan, K. et al. DNA microarrays identification of primary and secondary target genes regulated by p53. *Oncogene* **20**, 2225-34 (2001).
25. Shaughnessy, J.D., Jr. et al. A validated gene expression model of high-risk multiple myeloma is defined by deregulated expression of genes mapping to chromosome 1. *Blood* **109**, 2276-84 (2007).
26. Hu, J. et al. Gene expression signature for angiogenic and nonangiogenic non-small-cell lung cancer. *Oncogene* **24**, 1212-9 (2005).
27. Manalo, D.J. et al. Transcriptional regulation of vascular endothelial cell responses to hypoxia by HIF-1. *Blood* **105**, 659-69 (2005).
28. Mense, S.M. et al. Gene expression profiling reveals the profound upregulation of hypoxia-responsive genes in primary human astrocytes. *Physiol Genomics* **25**, 435-49 (2006).
29. Leonard, M.O., Cottell, D.C., Godson, C., Brady, H.R. & Taylor, C.T. The role of HIF-1 alpha in transcriptional regulation of the proximal tubular epithelial cell response to hypoxia. *J Biol Chem* **278**, 40296-304 (2003).
30. Semenza, G.L. Hypoxia-inducible factor 1: oxygen homeostasis and disease pathophysiology. *Trends Mol Med* **7**, 345-50 (2001).
31. Richardson, P.G. et al. Bortezomib or high-dose dexamethasone for relapsed multiple myeloma. *N Engl J Med* **352**, 2487-98 (2005).
32. Mulligan, G. et al. Gene expression profiling and correlation with outcome in clinical trials of the proteasome inhibitor bortezomib. *Blood* **109**, 3177-88 (2007).
33. Mitsiades, N. et al. Apoptotic signaling induced by immunomodulatory thalidomide analogs in human multiple myeloma cells: therapeutic implications. *Blood* **99**, 4525-30 (2002).
34. Mitsiades, N. et al. Biologic sequelae of nuclear factor-kappaB blockade in multiple myeloma: therapeutic applications. *Blood* **99**, 4079-86 (2002).
35. Mitsiades, N., Mitsiades, C.S., Poulaki, V., Anderson, K.C. & Treon, S.P. Intracellular regulation of tumor necrosis factor-related apoptosis-inducing ligand-induced apoptosis in human multiple myeloma cells. *Blood* **99**, 2162-71 (2002).
36. Mitsiades, C.S. et al. Activation of NF-kappaB and upregulation of intracellular anti-apoptotic proteins via the IGF-1/Akt signaling in human multiple myeloma cells: therapeutic implications. *Oncogene* **21**, 5673-83 (2002).
37. Shringarpure, R., Grune, T., Mehlhase, J. & Davies, K.J. Ubiquitin conjugation is not required for the degradation of oxidized proteins by proteasome. *J Biol Chem* **278**, 311-8 (2003).

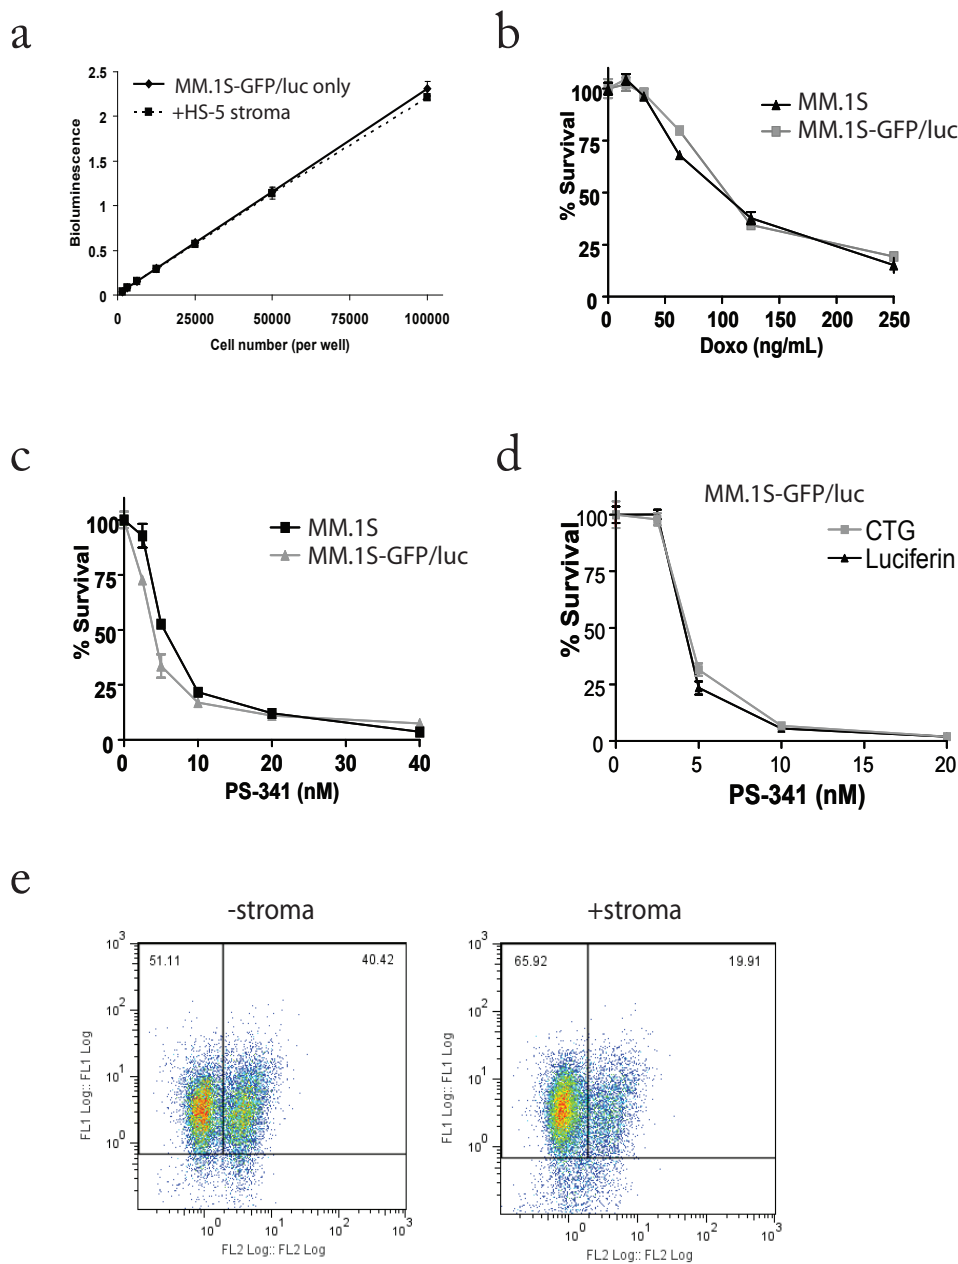

**SUPPLEMENTAL FIGURE 1. Features of CS-BLI for the specific measurement of tumor viability in the presence or absence of accessory cells. (a)** Luc<sup>+</sup> MM.1S cells plated at increasing cell numbers had a linear correlation of viable MM cells both in the presence or absence of HS-5 stromal cells. **(b, c)** MTT viability assessment yielded results consistent in MM.1S parental cells and transduced cells expressing GFP/luc when treated with Doxo or PS-341 in the absence of stromal cells. **(d)** MM.1S-GFP/luc cells yielded consistent results when viability was measured by CellTiterGlo (CTG) or CS-BLI. Using flow cytometry, MM.1S-GFP/luc cells were exposed to Doxo in the presence and absence of GFP<sup>-</sup> stromal cells. **(e)** GFP<sup>+</sup> MM cells had fewer non-viable (Apo2.7<sup>+</sup>) cells in the presence vs. absence of BMSCs.

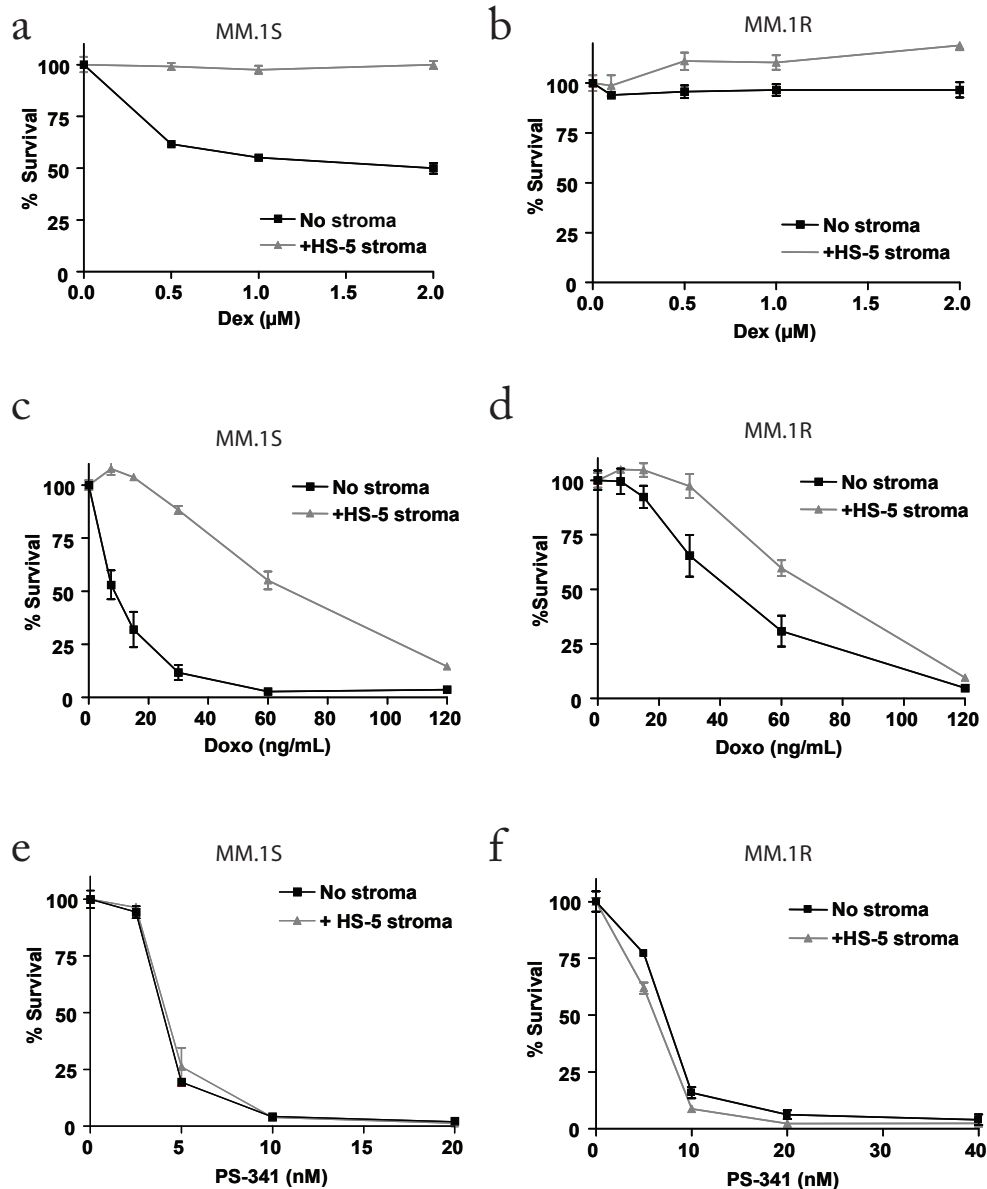

**SUPPLEMENTAL FIGURE 2. CS-BLI confirms that co-culture with BMSCs confers protection against specific anti-tumor agents in MM cells.** (a, c, e) MM.1S-GFP/luc and (b, d, f) MM.1R-GFP/luc cells were plated in the presence or absence of HS-5 BMSCs (10,000 cells per well) and treated with (a, b) Dex, (c, d) Doxo or (e, f) the proteasome inhibitor bortezomib (PS-341). BMSCs confer to MM.1S cells protection against Dex and Doxo, but not PS-341. BMSCs have little effect on the Dex-resistant cell line, MM.1R, in response to Dex treatment, but confer protection against Doxo. In addition, BMSCs confer no protection to treatment of MM.1R cells with PS-341.

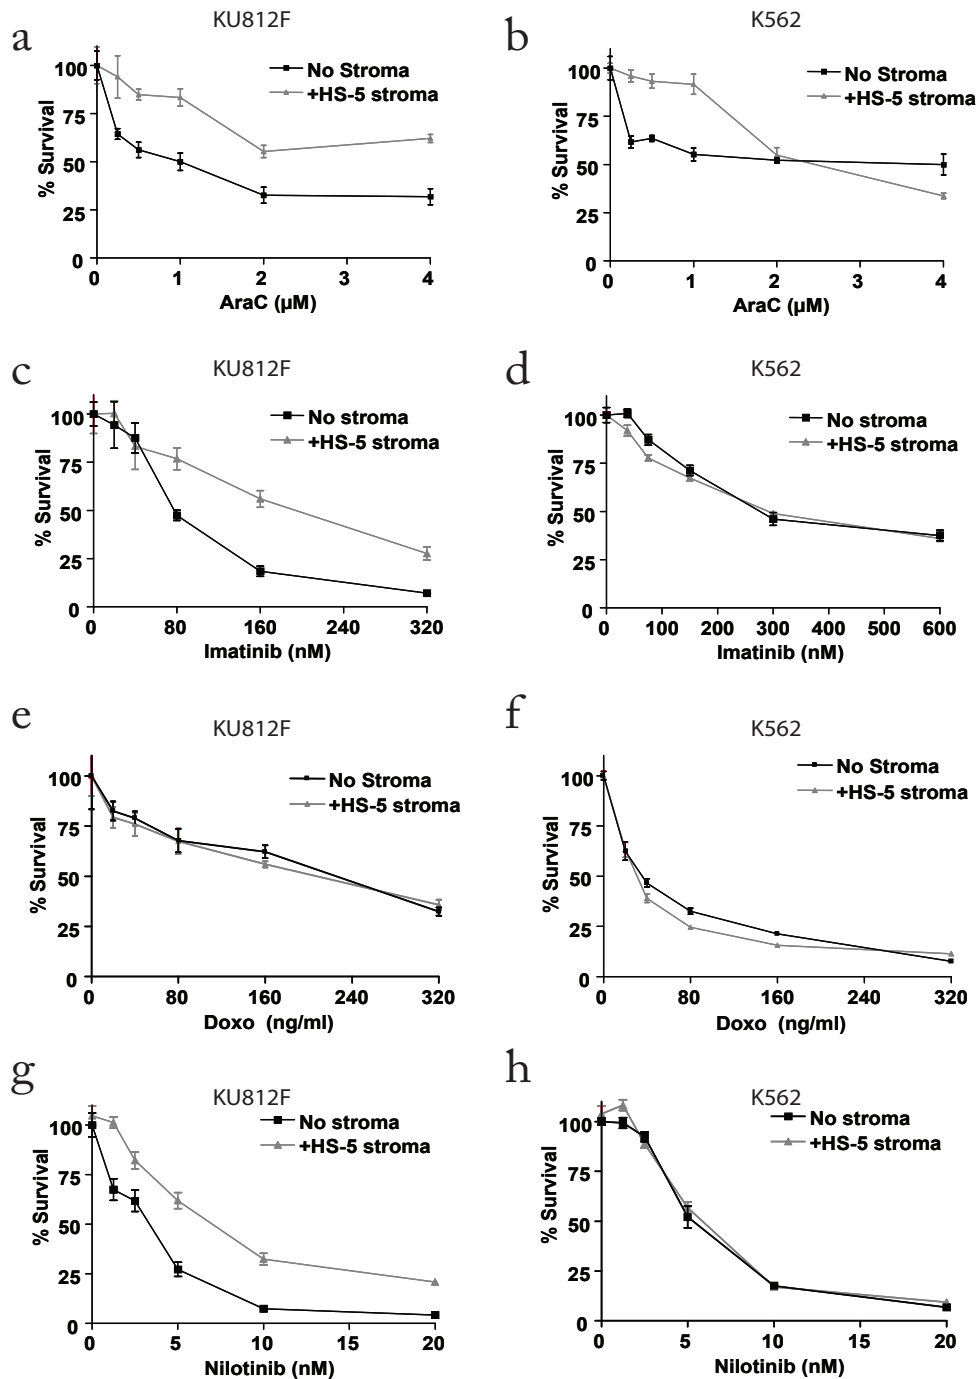

**SUPPLEMENTAL FIGURE 3. BMSCs confer protection against various agents in leukemia cell lines.** (a, c, e, g) Luc<sup>+</sup> KU812F and (b, d, f, h) K562 leukemia cells were plated in the presence or absence of HS-5 BMSCs (10,000 per well) and treated with (a, b) Ara-C, (c, d) imatinib, (e, f) Doxo or (g, h) nilotinib. BMSCs confer protection against AraC, Imatinib and nilotinib, but not Doxo in KU812F cells. For K562 cells, BMSCs confer protection against Ara-C, but not imatinib, Doxo or nilotinib.

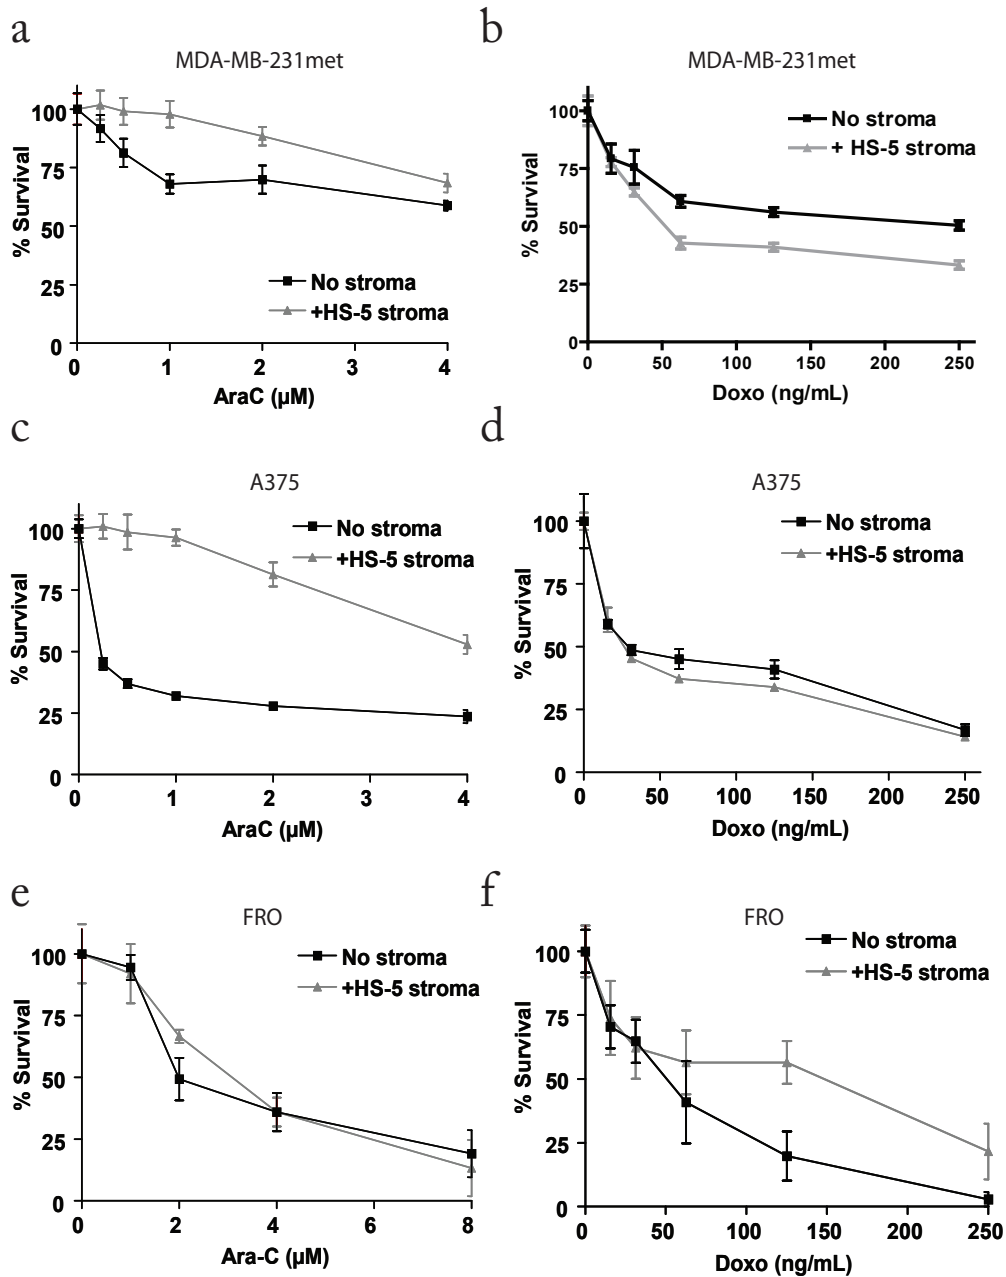

**SUPPLEMENTAL FIGURE 4. Co-culture with BMSCs can protect solid tumor cell lines against anti-cancer agents.** (a, b) Luc<sup>+</sup> MDA-MB-231met, (c, d) A375 and (e, f) FRO cells were plated with or without HS-5 BMSCs (10,000 cells per well), treated the following day, and incubated for an additional 48 h. BMSCs confer modest protection against both (a) AraC and (b) Doxo in MDA-MB-231-met cells. BMSCs provided a considerable level of protection to (c) AraC, but not against (d) Doxo in A375 cells. Lastly, BMSCs confer no protection against (e) AraC, but confer modest protection against (f) Doxo in FRO cells.

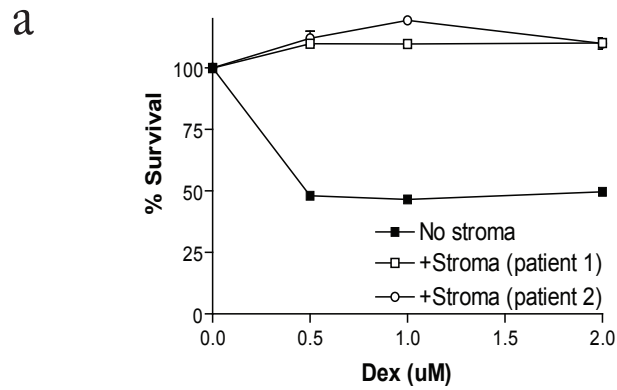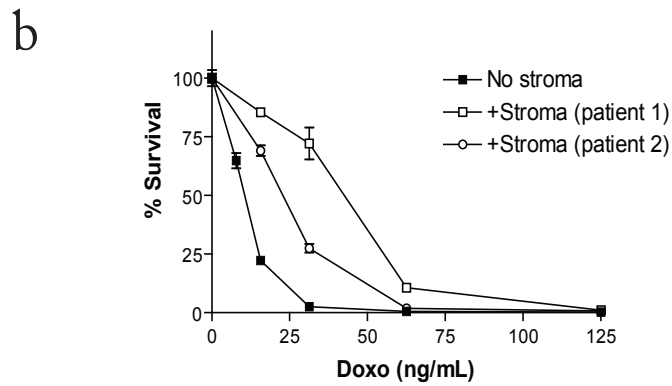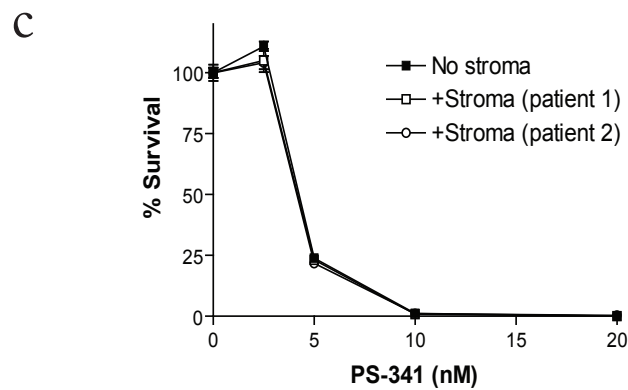

**SUPPLEMENTAL FIGURE 5. Co-culture with primary BMSCs from MM patients provides tumor cell protection against specific anti-cancer agents.** MM.1S-GFP/luc were plated in the presence or absence of BMSCs isolated from two different MM patients (10,000 per well) and treated with (a) Dex, (b) Doxo or (c) PS-341. Both patient BMSC samples confer protection against Dex and Doxo, but not PS-341 in MM cells.



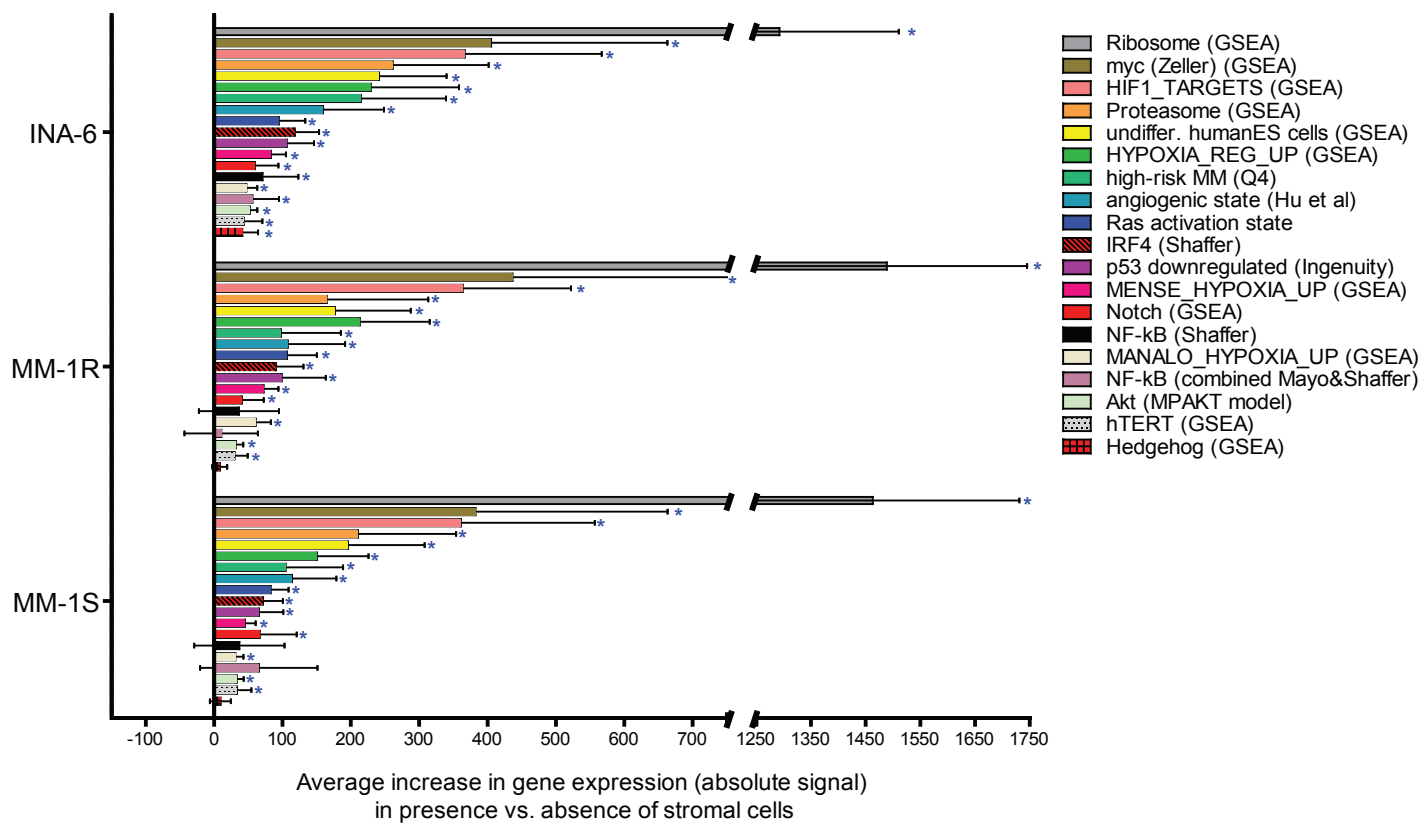

**SUPPLEMENTAL FIGURE 6. Interaction of MM cells with BMSCs leads to distinct changes in transcriptional signatures indicative of the activation of key molecular pathways in tumor cell pathophysiology.** Transcripts previously shown to reflect the activation state of the indicated pathways were evaluated for differences in expression in each MM cell line, in the presence vs. absence of BMSCs *in vitro*. For each transcriptional signature, the average value (+/- 95% confidence limit) of absolute expression signal in MM cells for each cell line and each experimental condition (i.e. culture in the presence vs. absence of BMSCs) is shown.

a

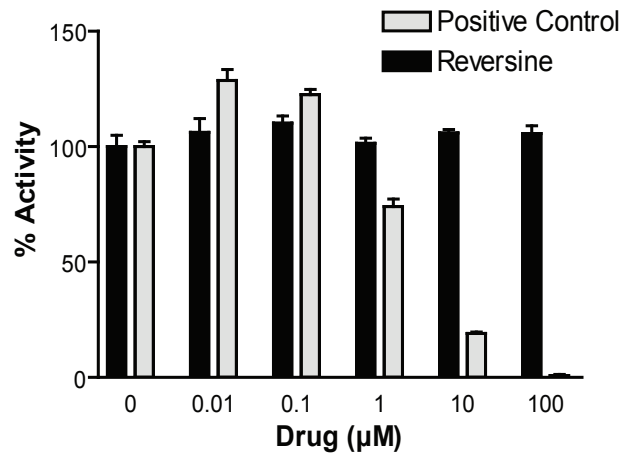

b

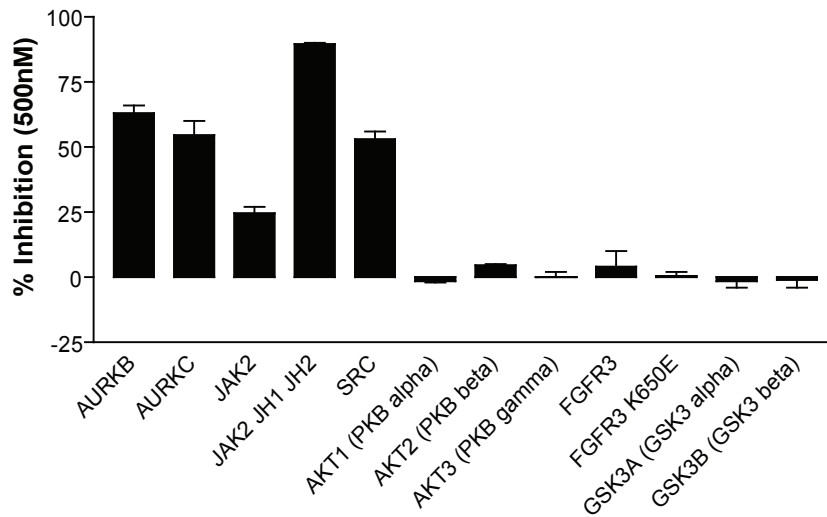

**SUPPLEMENTAL FIGURE 7. In vitro luciferase and kinase activity assays of reversine.** (a) *In vitro* luciferase activity was screened in the presence of reversine. Luciferase was reconstituted in Glycine-Tris buffer plus EDTA and MgSO<sub>4</sub>, with the addition of ATP and increasing concentrations of reversine or the positive control, resveratrol. Luminescence was detected immediately after the addition of the substrate ( $n = 4$ ). Reversine (up to 100  $\mu\text{M}$ ) did not block luciferase activity. (b) Using the Z'-Lyte™ kinase assay, select kinases were screened for activity in the presence of 500 nM reversine. Inhibition of activity was observed against a select subset of kinases, including Auroras, JAK2, and SRC, but not other kinases important for MM growth and survival, including AKT1, 2, 3, FGFR3, GSK3A or B.

A

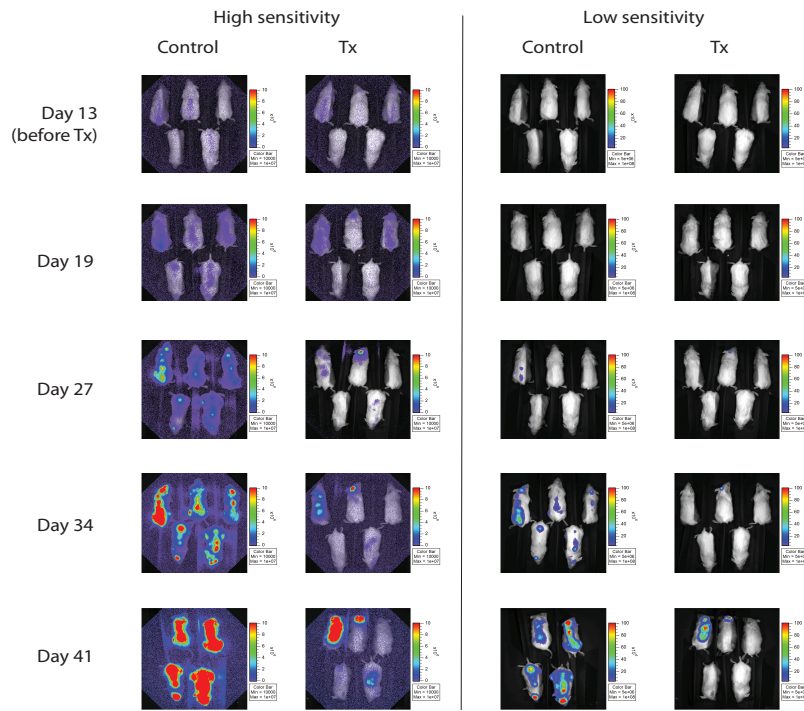

B

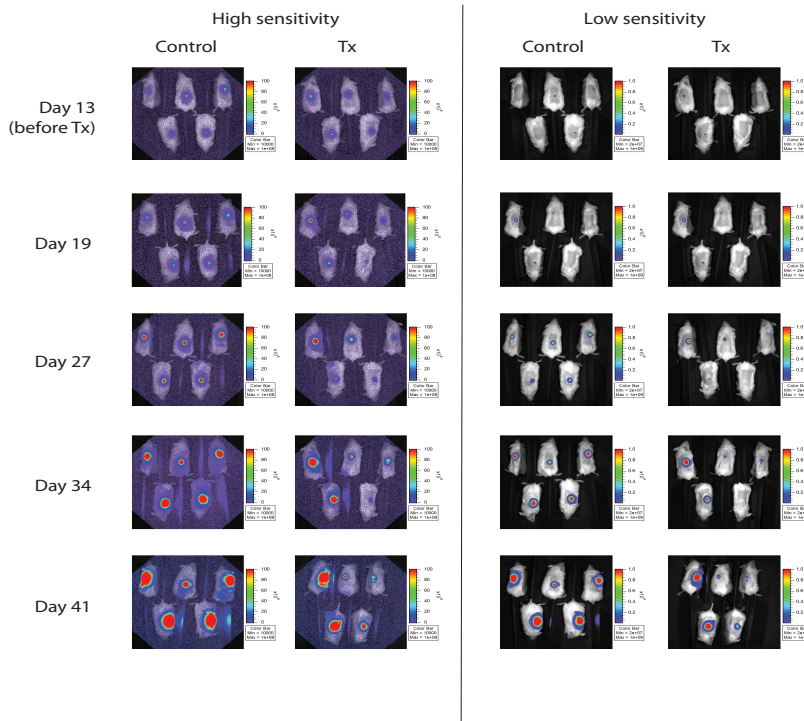

**SUPPLEMENTAL FIGURE 8. Imaging results over time for each reversine-treated and control mouse in the tumor experiment of MM.1S-GFP/luc cells injected i.v. vs s.c. (a)** Imaging results are shown utilizing the IVIS Xenogen camera system following i.p. injection of luciferin substrate in *SCID-Beige* mice bearing diffuse lesion tumors. **(b)** Imaging results are shown utilizing the IVIS Xenogen camera system following i.p. injection of luciferin substrate in *SCID-Beige* mice bearing s.c. tumors. Graphical results for each model were analyzed using Living Image software and displayed utilizing both high sensitivity settings as well as lower sensitivity settings to display tumors.

Supplemental Table 1: Cell signaling transcripts

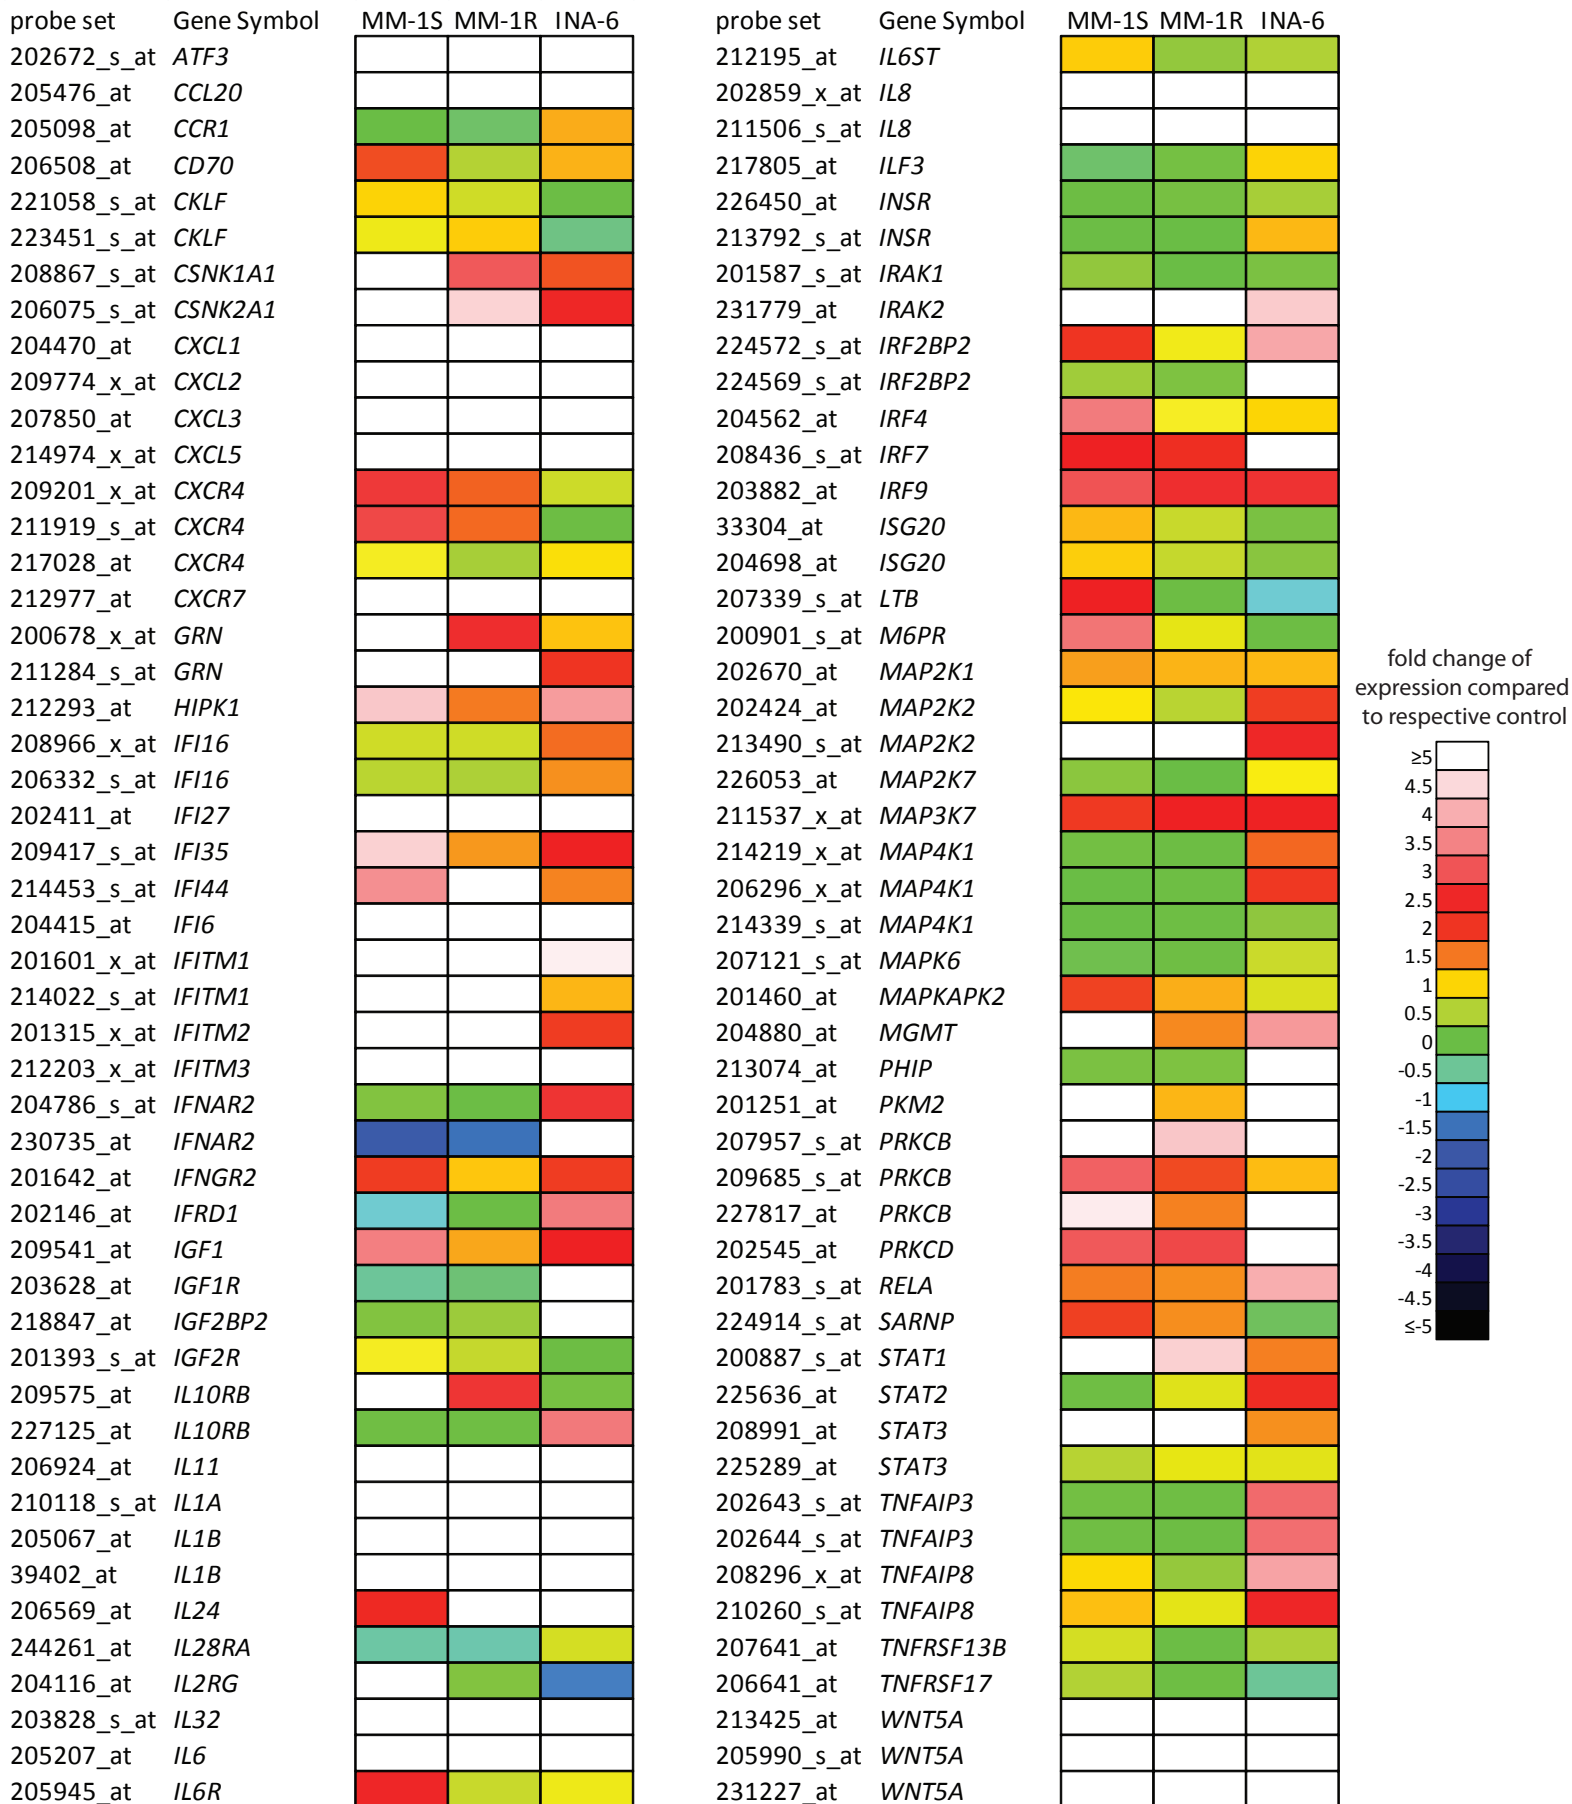

Supplemental Table 1: Transcripts for putative oncoproteins

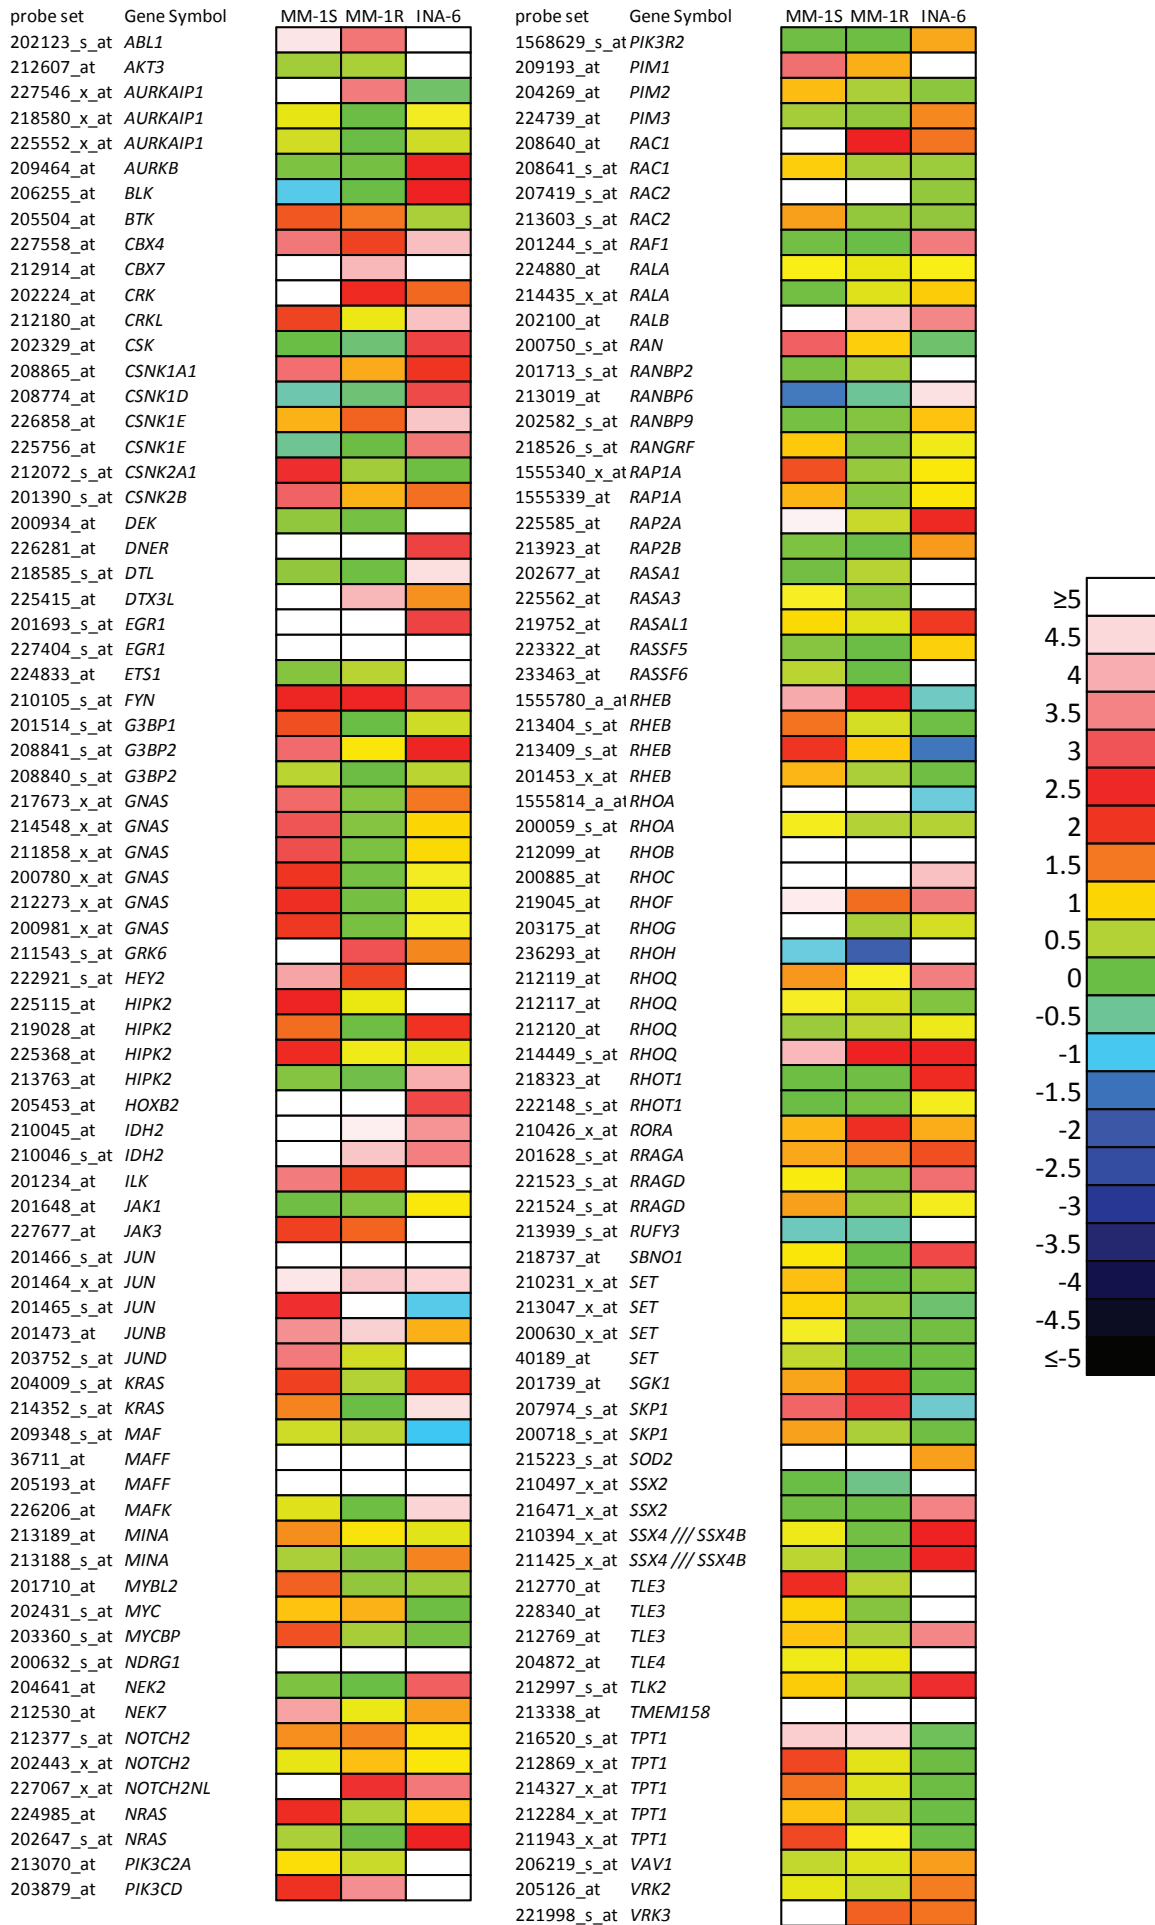

Supplemental Table 1: Transcripts for regulation of survival - apoptosis

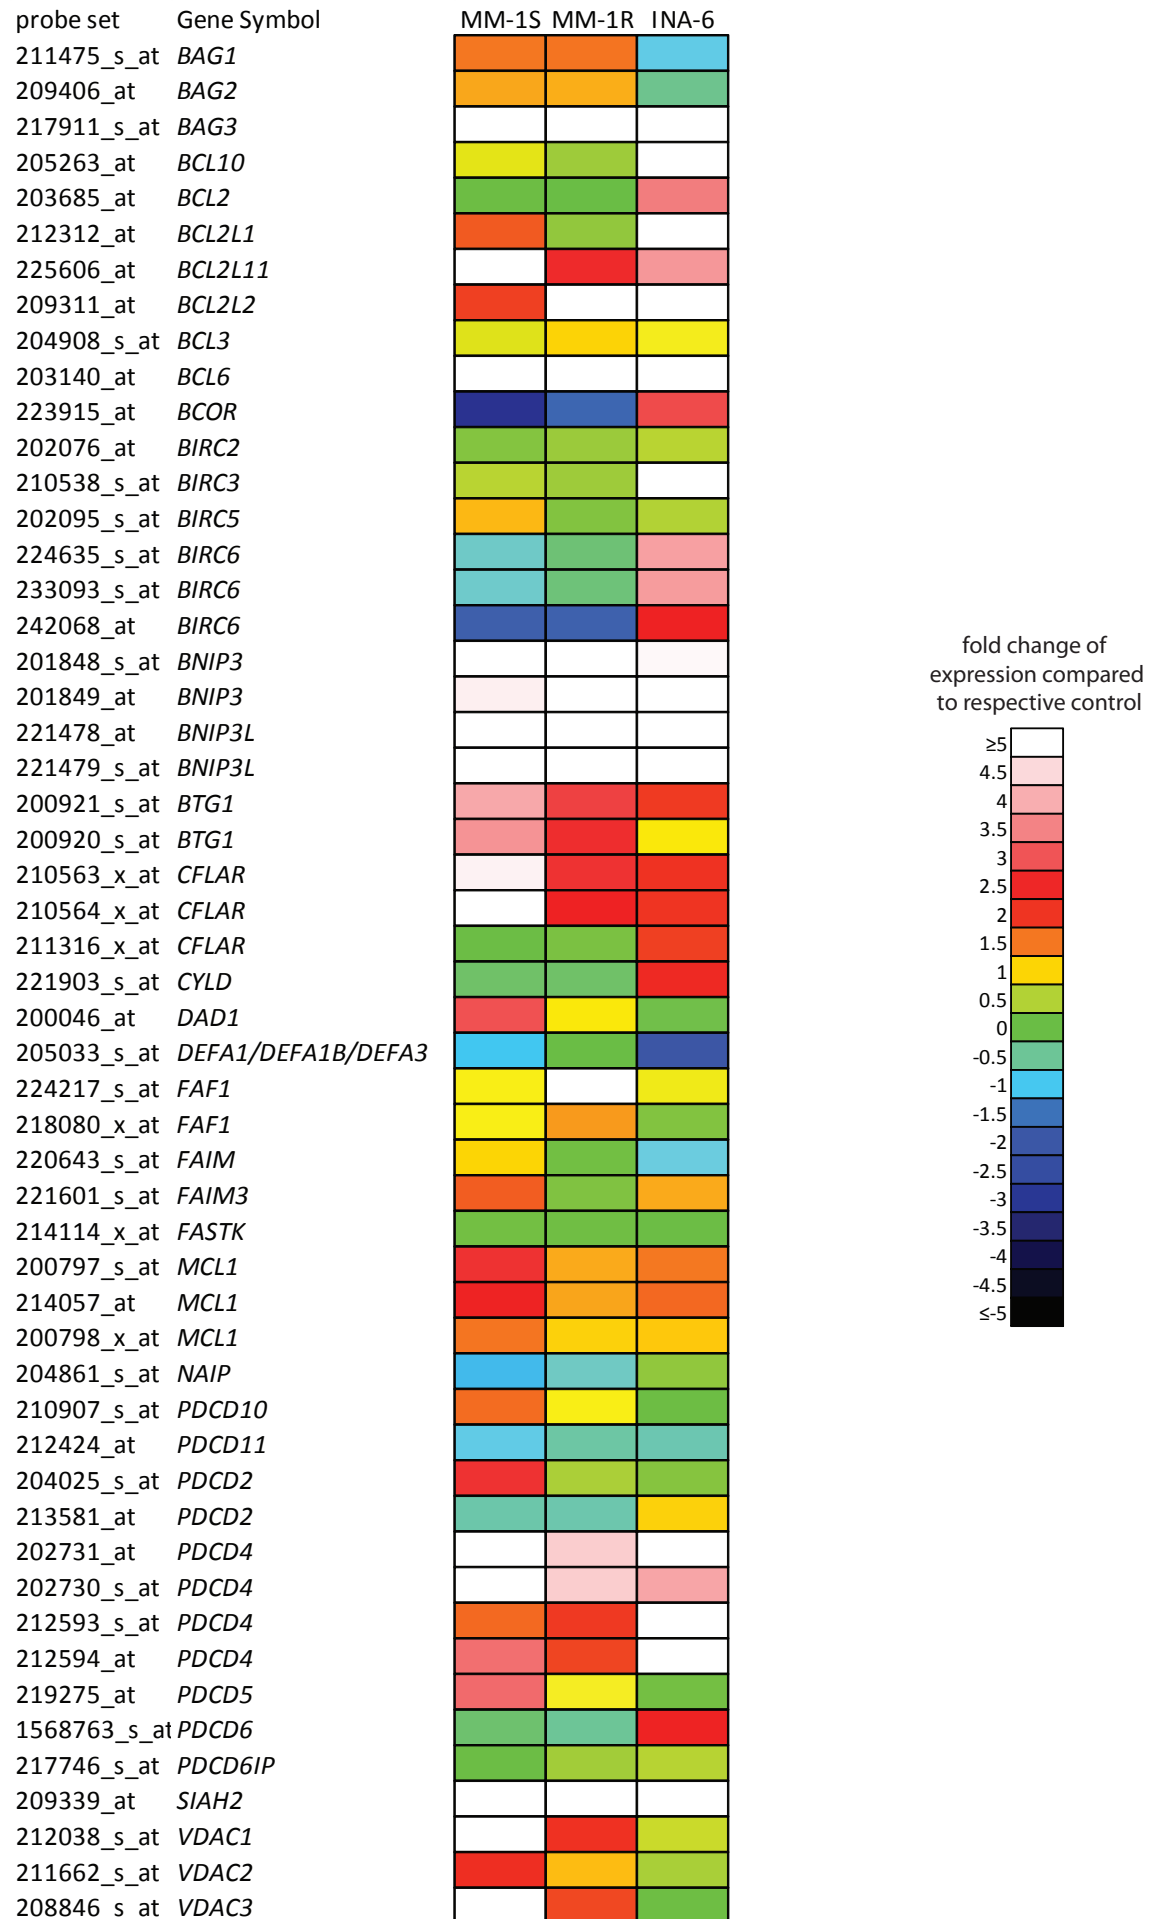

Supplemental Table 1: Transcripts for heat shock proteins - molecular chaperones

| probe set   | Gene Symbol   | MM-1S | MM-1R | INA-6 |
|-------------|---------------|-------|-------|-------|
| 201491_at   | AHSA1         | 2.5   | 0.5   | 0.5   |
| 226665_at   | AHSA2         | 0     | 0     | 0     |
| 218168_s_at | CABC1         | 0.5   | 0.5   | 0     |
| 201947_s_at | CCT2          | 1.5   | 0.5   | 0.5   |
| 200910_at   | CCT3          | 2.5   | 0.5   | 0.5   |
| 200877_at   | CCT4          | 2.5   | 1.5   | 0.5   |
| 200812_at   | CCT7          | 1.5   | 0.5   | 0.5   |
| 200873_s_at | CCT8          | 1.5   | 0.5   | 0.5   |
| 208791_at   | CLU           | 0     | 1.5   | -1.5  |
| 208792_s_at | CLU           | 0.5   | 0.5   | 0.5   |
| 209157_at   | DNAJA2        | 2.5   | 1.5   | 0.5   |
| 200664_s_at | DNAJB1        | 0     | 0     | 0     |
| 200666_s_at | DNAJB1        | 0     | 0     | 0     |
| 223054_at   | DNAJB11       | 0.5   | 1.5   | -1.5  |
| 202500_at   | DNAJB2        | 0     | 0.5   | 0     |
| 208810_at   | DNAJB6        | 0     | 2.5   | 0.5   |
| 202842_s_at | DNAJB9        | 1.5   | 0.5   | -0.5  |
| 218409_s_at | DNAJC1        | 1.5   | 0.5   | 0.5   |
| 218976_at   | DNAJC12       | 2.5   | 1.5   | 2.5   |
| 228622_s_at | DNAJC4        | 0     | 1.5   | 0     |
| 202416_at   | DNAJC7        | 2.5   | 0.5   | 1.5   |
| 205545_x_at | DNAJC8        | 1.5   | 0.5   | 1.5   |
| 213088_s_at | DNAJC9        | 0.5   | 0.5   | 1.5   |
| 200942_s_at | HSBP1         | 0     | 0     | 0.5   |
| 209657_s_at | HSF2          | 0.5   | 0.5   | 0     |
| 210211_s_at | HSP90AA1      | 0.5   | 2.5   | 0.5   |
| 214328_s_at | HSP90AA1      | 1.5   | 0.5   | 0.5   |
| 214359_s_at | HSP90AB1      | 0     | 1.5   | 1.5   |
| 200064_at   | HSP90AB1      | 2.5   | 0.5   | 0.5   |
| 1557910_at  | HSP90AB1      | 1.5   | 0.5   | 0.5   |
| 200799_at   | HSPA1A        | 0     | 0     | 0     |
| 200800_s_at | HSPA1A/HSPA1B | 0     | 0     | 0     |
| 202581_at   | HSPA1A/HSPA1B | 0.5   | 2.5   | 0     |
| 211015_s_at | HSPA4         | 2.5   | 1.5   | 1.5   |
| 211936_at   | HSPA5         | 1.5   | 2.5   | -1.5  |
| 213418_at   | HSPA6         | 0     | 0     | 0     |
| 117_at      | HSPA6         | 0     | 0     | 0.5   |
| 210338_s_at | HSPA8         | 0.5   | 2.5   | -1.5  |
| 208687_x_at | HSPA8         | 2.5   | 0.5   | 0.5   |
| 224187_x_at | HSPA8         | 1.5   | 0.5   | 0.5   |
| 221891_x_at | HSPA8         | 1.5   | 0.5   | 0.5   |
| 200691_s_at | HSPA9         | 0.5   | 0.5   | 1.5   |
| 201841_s_at | HSPB1         | 0     | 0     | 0.5   |
| 207132_x_at | PFDN5         | 2.5   | 1.5   | 0.5   |
| 210908_s_at | PFDN5         | 1.5   | 0.5   | 0.5   |
| 213330_s_at | STIP1         | 1.5   | 0.5   | 1.5   |
| 212009_s_at | STIP1         | 2.5   | 2.5   | -0.5  |

fold change of expression compared to respective control

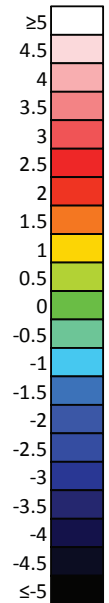

Supplemental Table 1: Transcripts for ubiquitin - proteasome pathway

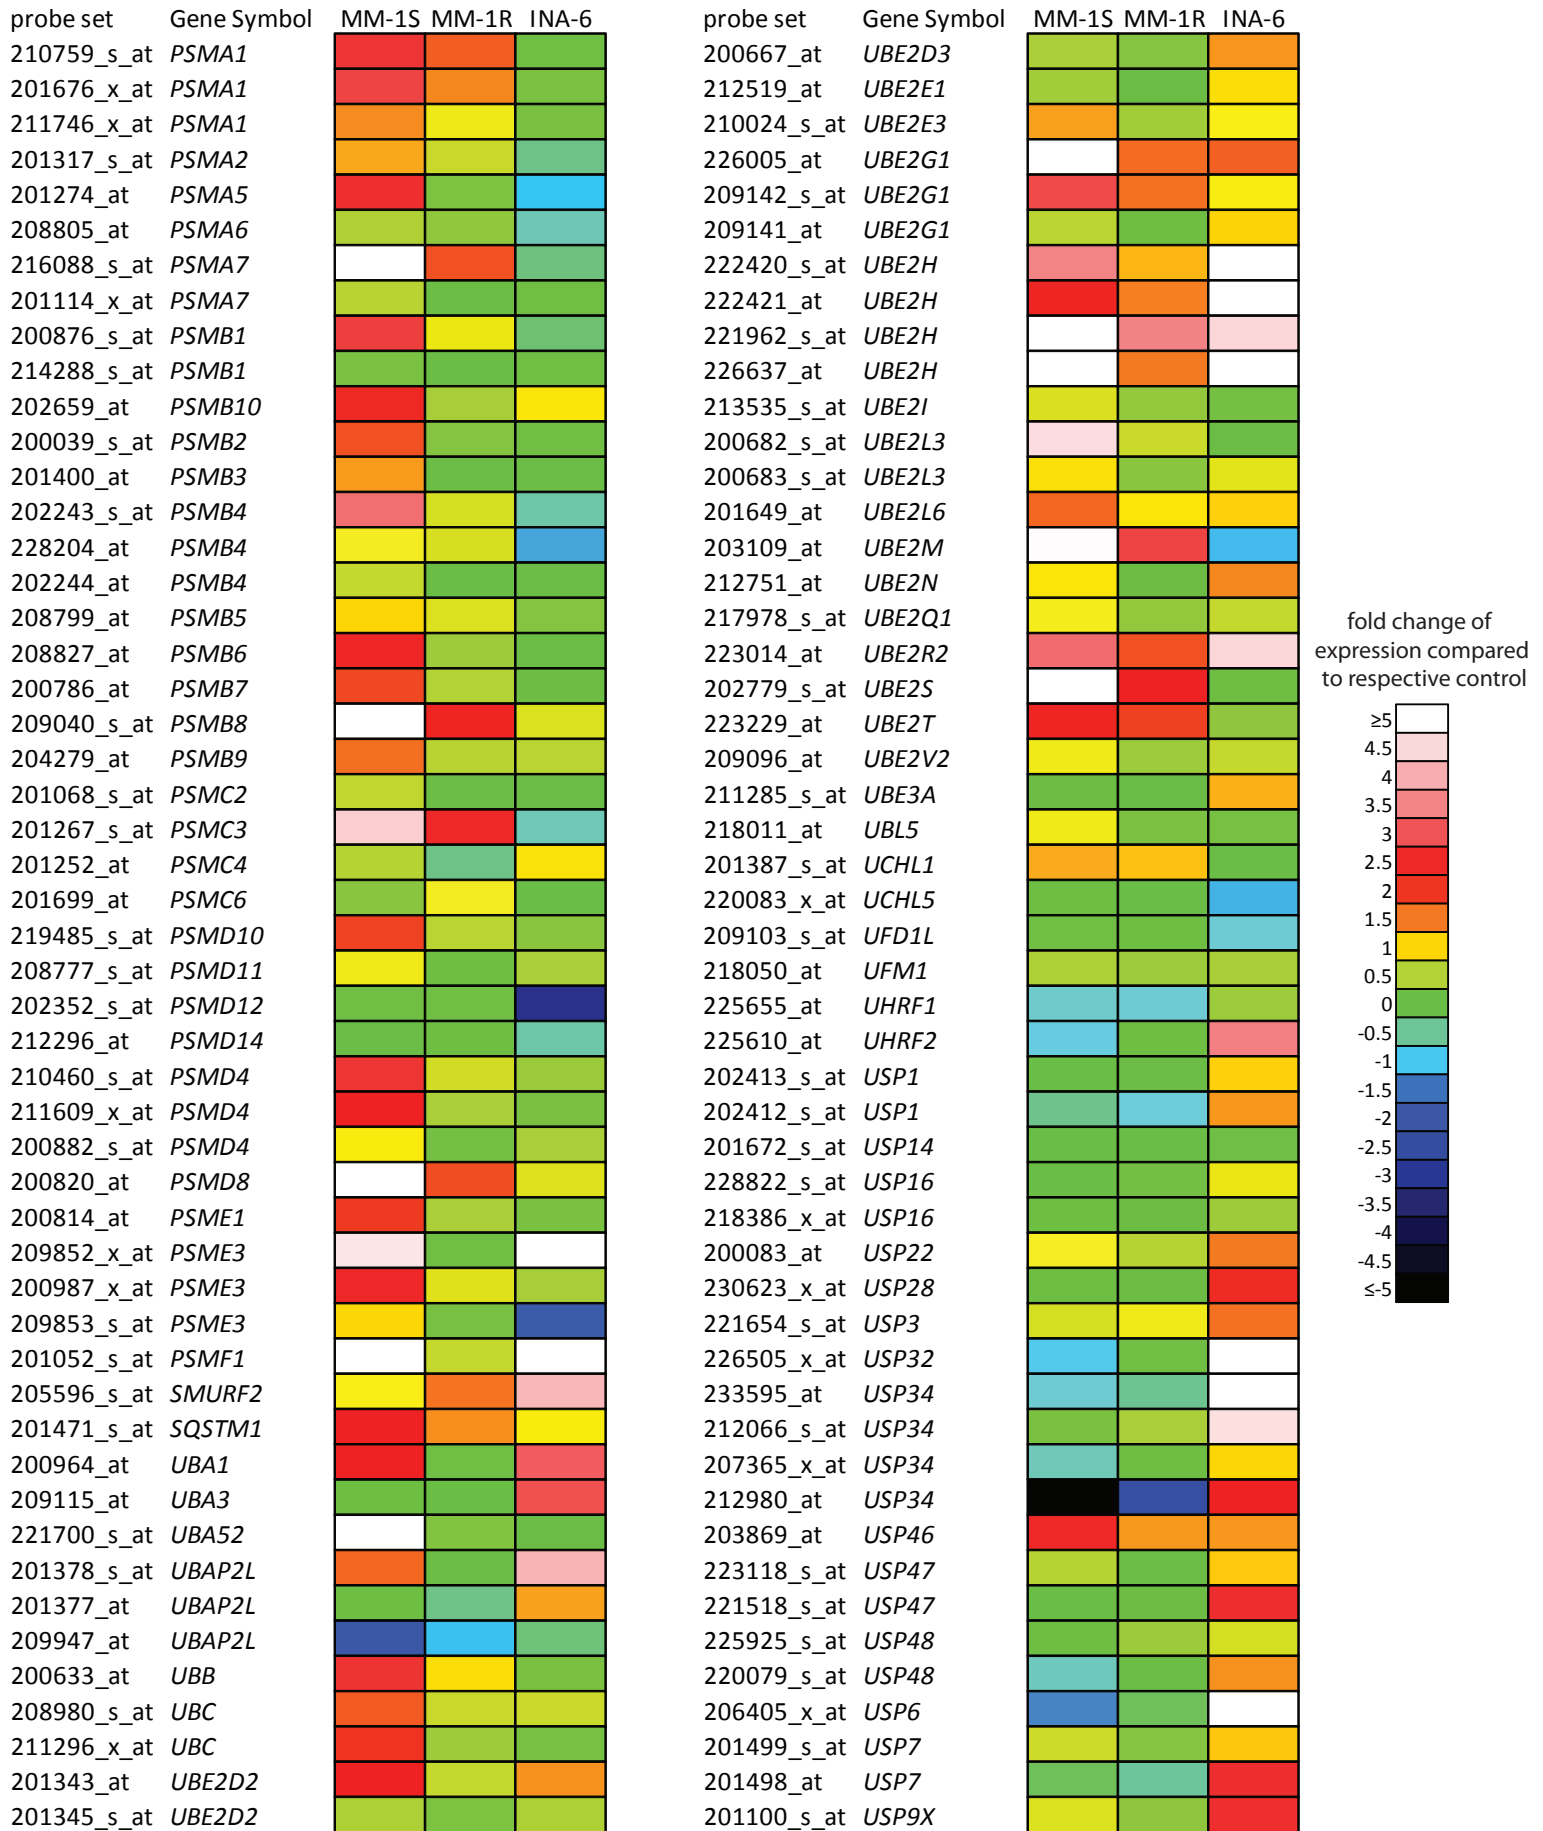



Supplemental Table 1: Transcripts for chromatin remodeling - histones

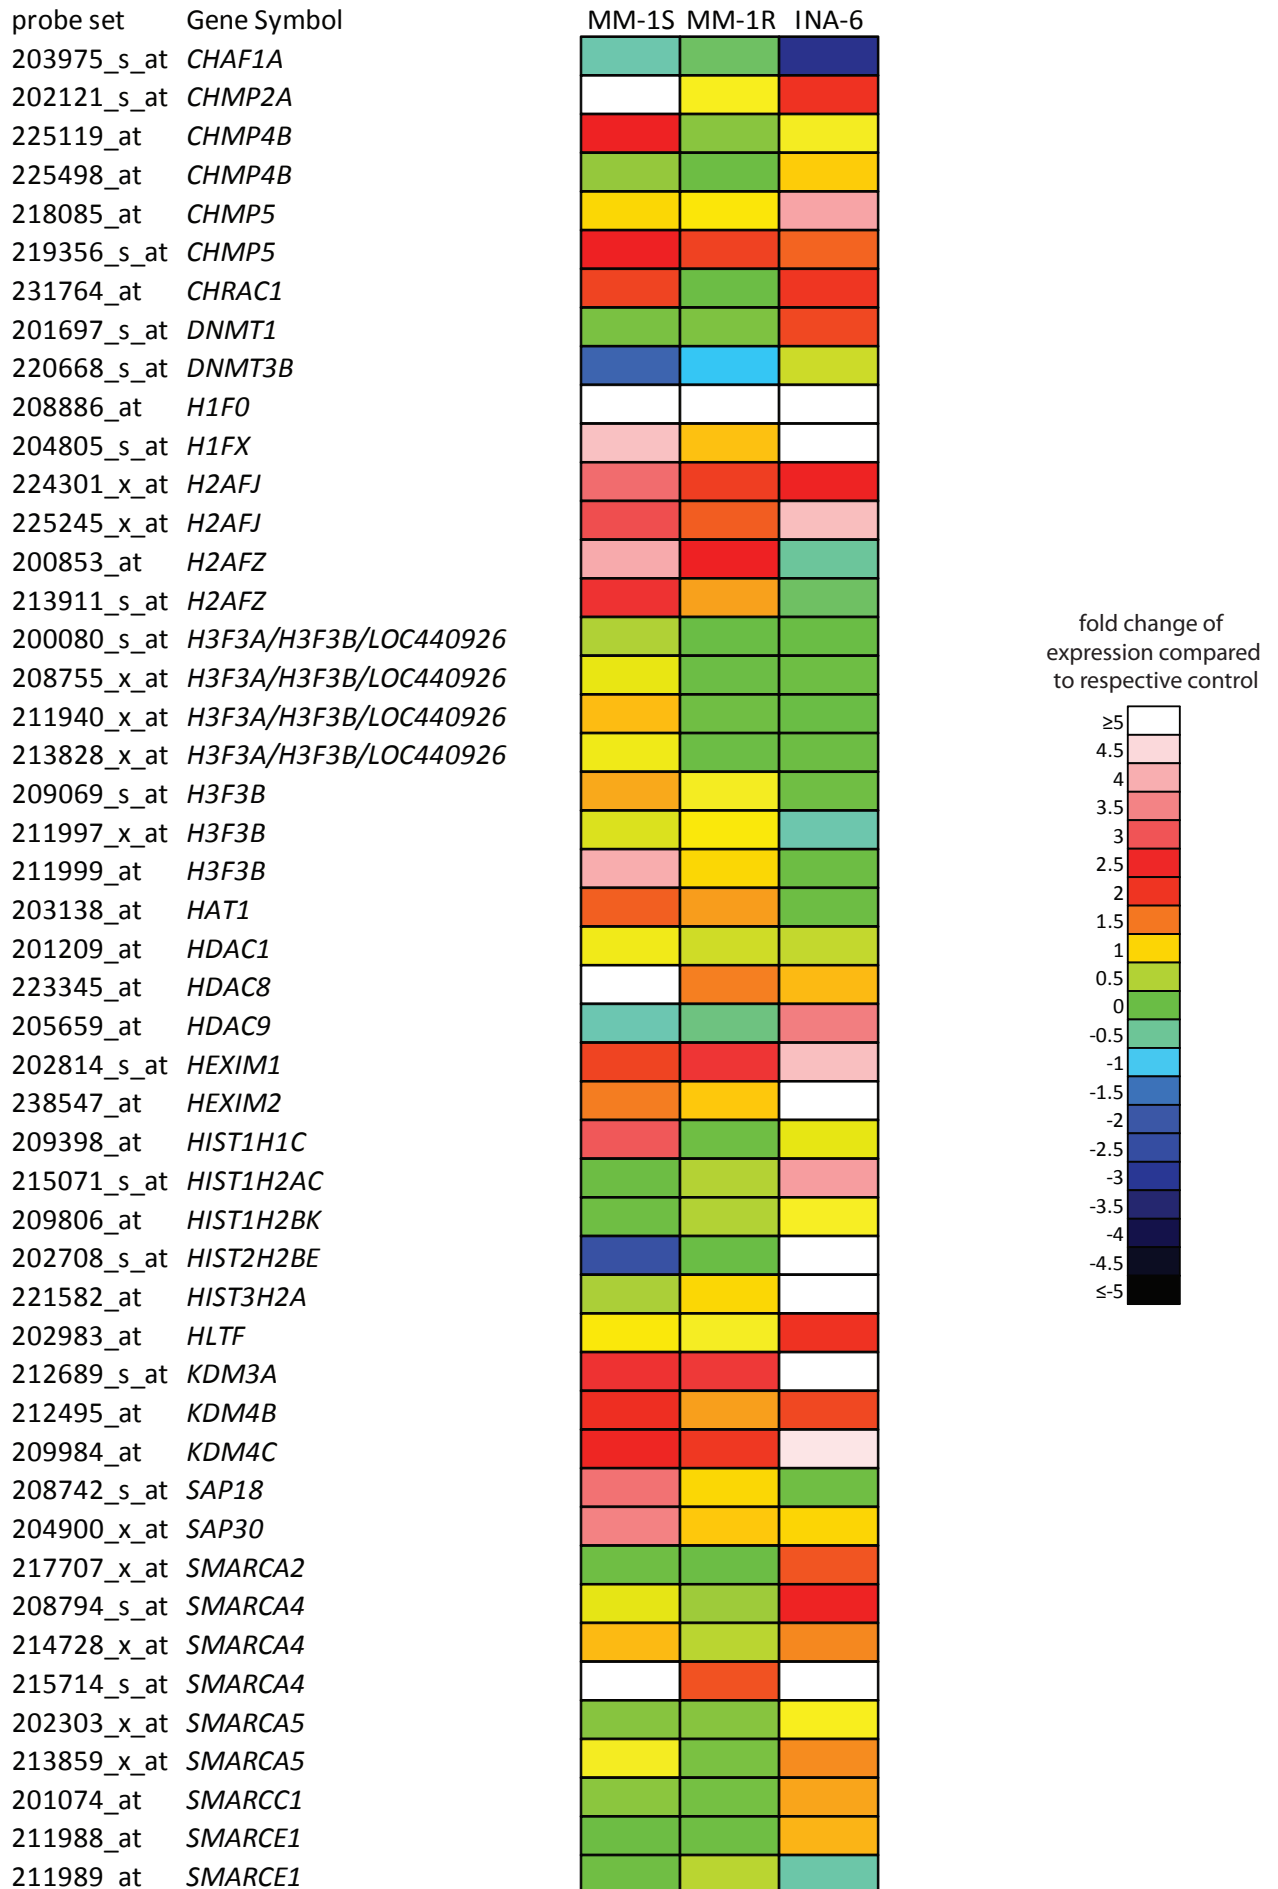

Supplemental Table 1: Transcripts for cell cycle regulation

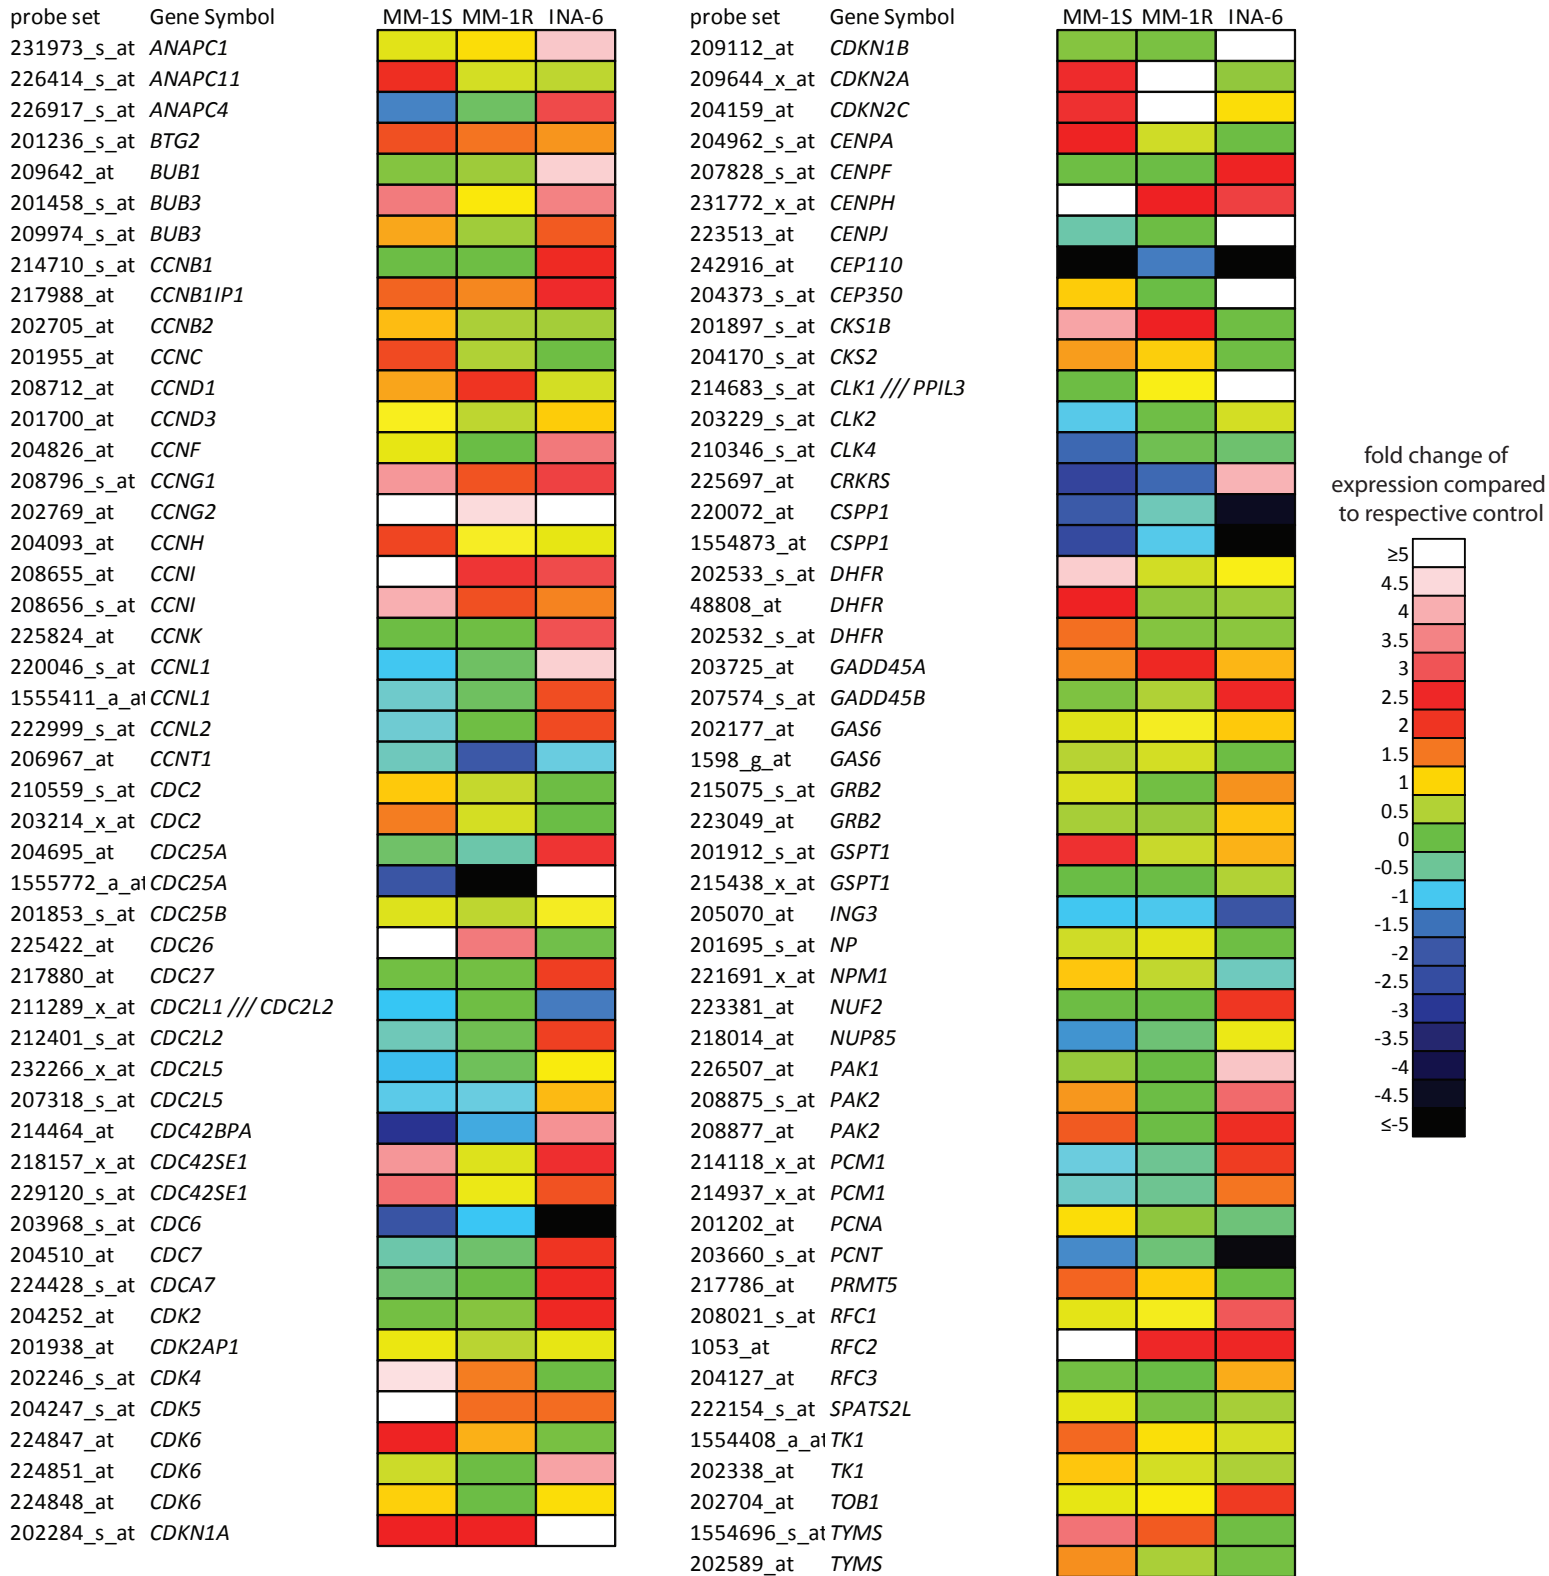

Supplemental Table 1: Transcripts for DNA repair - drug resistance

| probe set   | Gene Symbol    | MM-1S | MM-1R | INA-6 |
|-------------|----------------|-------|-------|-------|
| 223020_at   | <i>CLPTM1L</i> | 2.5   | 0.5   | 0.5   |
| 226935_s_at | <i>CLPTM1L</i> | 1.5   | 0.5   | 0.5   |
| 203719_at   | <i>ERCC1</i>   | 2.5   | 1.5   | 4.5   |
| 203720_s_at | <i>ERCC1</i>   | 4.5   | 4.5   | 0     |
| 202107_s_at | <i>MCM2</i>    | 1.5   | 0.5   | 1.5   |
| 201555_at   | <i>MCM3</i>    | 1.5   | 0.5   | 1.5   |
| 212269_s_at | <i>MCM3AP</i>  | 0.5   | 0.5   | 4.5   |
| 212141_at   | <i>MCM4</i>    | 4.5   | 1.5   | 1     |
| 222037_at   | <i>MCM4</i>    | 4.5   | 0.5   | 2.5   |
| 201755_at   | <i>MCM5</i>    | 4.5   | 0.5   | 4.5   |
| 216237_s_at | <i>MCM5</i>    | 0.5   | -0.5  | 1.5   |
| 210543_s_at | <i>PRKDC</i>   | 0     | 2.5   | 1.5   |
| 207405_s_at | <i>RAD17</i>   | 0.5   | 0.5   | 2.5   |
| 201039_s_at | <i>RAD23A</i>  | 1.5   | 0.5   | 0.5   |
| 201046_s_at | <i>RAD23A</i>  | 1.5   | 0.5   | 1.5   |
| 201222_s_at | <i>RAD23B</i>  | 2.5   | 1.5   | 1     |
| 201223_s_at | <i>RAD23B</i>  | 1.5   | 0.5   | 2.5   |
| 37793_r_at  | <i>RAD51L3</i> | 0.5   | 0.5   | 0     |
| 204558_at   | <i>RAD54L</i>  | -2    | 0.5   | 0.5   |
| 204828_at   | <i>RAD9A</i>   | -1    | 0.5   | 0.5   |
| 218598_at   | <i>RINT1</i>   | -1    | 0.5   | 1     |
| 201589_at   | <i>SMC1A</i>   | 1     | 0.5   | 2.5   |
| 201663_s_at | <i>SMC4</i>    | 0.5   | 0.5   | 1.5   |
| 201664_at   | <i>SMC4</i>    | 0.5   | 0.5   | 1.5   |
| 212927_at   | <i>SMC5</i>    | -1    | 0.5   | 0.5   |
| 202307_s_at | <i>TAP1</i>    | 0.5   | 0.5   | 0.5   |
| 225973_at   | <i>TAP2</i>    | 0.5   | 0.5   | 1     |
| 225802_at   | <i>TOP1MT</i>  | 0.5   | 0.5   | 2.5   |
| 201292_at   | <i>TOP2A</i>   | 1.5   | 0.5   | 4.5   |
| 211987_at   | <i>TOP2B</i>   | 0.5   | 0.5   | 1.5   |

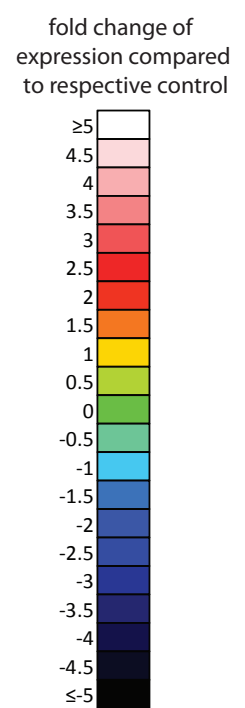

Supplemental Table 1: Transcripts related to microenvironmental interactions - hypoxia

| probe set    | Gene Symbol | MM-1S  | MM-1R  | INA-6  |
|--------------|-------------|--------|--------|--------|
| 221009_s_at  | ANGPTL4     |        |        |        |
| 203963_at    | CA12        |        |        |        |
| 214164_x_at  | CA12        |        |        |        |
| 215867_x_at  | CA12        |        |        |        |
| 203065_s_at  | CAV1        |        | red    | yellow |
| 212097_at    | CAV1        | orange | yellow | green  |
| 202310_s_at  | COL1A1      |        |        |        |
| 202403_s_at  | COL1A2      |        |        |        |
| 202404_s_at  | COL1A2      |        |        | red    |
| 219625_s_at  | COL4A3BP    | orange | green  | pink   |
| 223466_x_at  | COL4A3BP    | orange | green  | pink   |
| 203325_s_at  | COL5A1      |        |        | pink   |
| 213428_s_at  | COL6A1      |        |        |        |
| 209156_s_at  | COL6A2      |        |        |        |
| 201438_at    | COL6A3      |        |        |        |
| 204136_at    | COL7A1      |        |        | teal   |
| 201360_at    | CST3        |        | orange | red    |
| 200838_at    | CTSB        |        |        | red    |
| 200839_s_at  | CTSB        |        |        | red    |
| 213275_x_at  | CTSB        | yellow | red    | pink   |
| 227961_at    | CTSB        |        |        |        |
| 201487_at    | CTSC        | red    | red    | blue   |
| 225646_at    | CTSC        |        | pink   | blue   |
| 225647_s_at  | CTSC        |        |        | blue   |
| 203657_s_at  | CTSF        | red    | pink   | red    |
| 202087_s_at  | CTSL1       |        |        |        |
| 209058_at    | EDF1        | pink   | yellow | yellow |
| 209059_s_at  | EDF1        |        | yellow | green  |
| 210213_s_at  | EIF6        | red    | green  | orange |
| 202041_s_at  | FIBP        | pink   | yellow | red    |
| 210142_x_at  | FLOT1       | red    | orange | yellow |
| 202304_at    | FNDC3A      | green  | yellow | pink   |
| 218618_s_at  | FNDC3B      | yellow | yellow | red    |
| 225032_at    | FNDC3B      | red    | red    | red    |
| 200989_at    | HIF1A       | green  | green  | orange |
| 1554452_a_at | HIG2        | pink   | pink   |        |
| 218507_at    | HIG2        | orange | red    |        |
| 202637_s_at  | ICAM1       | pink   |        | green  |
| 213620_s_at  | ICAM2       | green  | green  | teal   |
| 211945_s_at  | ITGB1       | pink   | red    | green  |
| 203336_s_at  | ITGB1BP1    | orange | yellow | green  |
| 205176_s_at  | ITGB3BP     | green  | green  | yellow |
| 204475_at    | MMP1        |        |        |        |
| 201069_at    | MMP2        | orange |        |        |
| 205828_at    | MMP3        |        |        |        |
| 204479_at    | OSTF1       |        | red    | pink   |
| 207543_s_at  | P4HA1       | pink   | pink   | red    |
| 202733_at    | P4HA2       | pink   |        |        |
| 200654_at    | P4HB        | red    | yellow | green  |
| 200656_s_at  | P4HB        | pink   | red    | blue   |
| 200658_s_at  | PHB         | orange | green  | green  |
| 201600_at    | PHB2        | orange | green  | orange |
| 201860_s_at  | PLAT        |        |        |        |
| 210845_s_at  | PLAUR       |        |        | yellow |
| 200827_at    | PLOD1       |        | pink   | yellow |
| 202619_s_at  | PLOD2       |        |        |        |
| 202620_s_at  | PLOD2       |        |        |        |
| 209879_at    | SELPLG      | orange | green  | green  |
| 209880_s_at  | SELPLG      |        | pink   | blue   |
| 200931_s_at  | VCL         | orange | red    | red    |
| 210512_s_at  | VEGFA       | yellow | red    |        |
| 209946_at    | VEGFC       |        |        | pink   |

fold change of expression compared to respective control

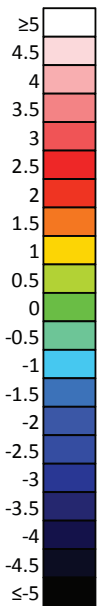

Supplemental Table 1: Transcripts for ribosomal proteins

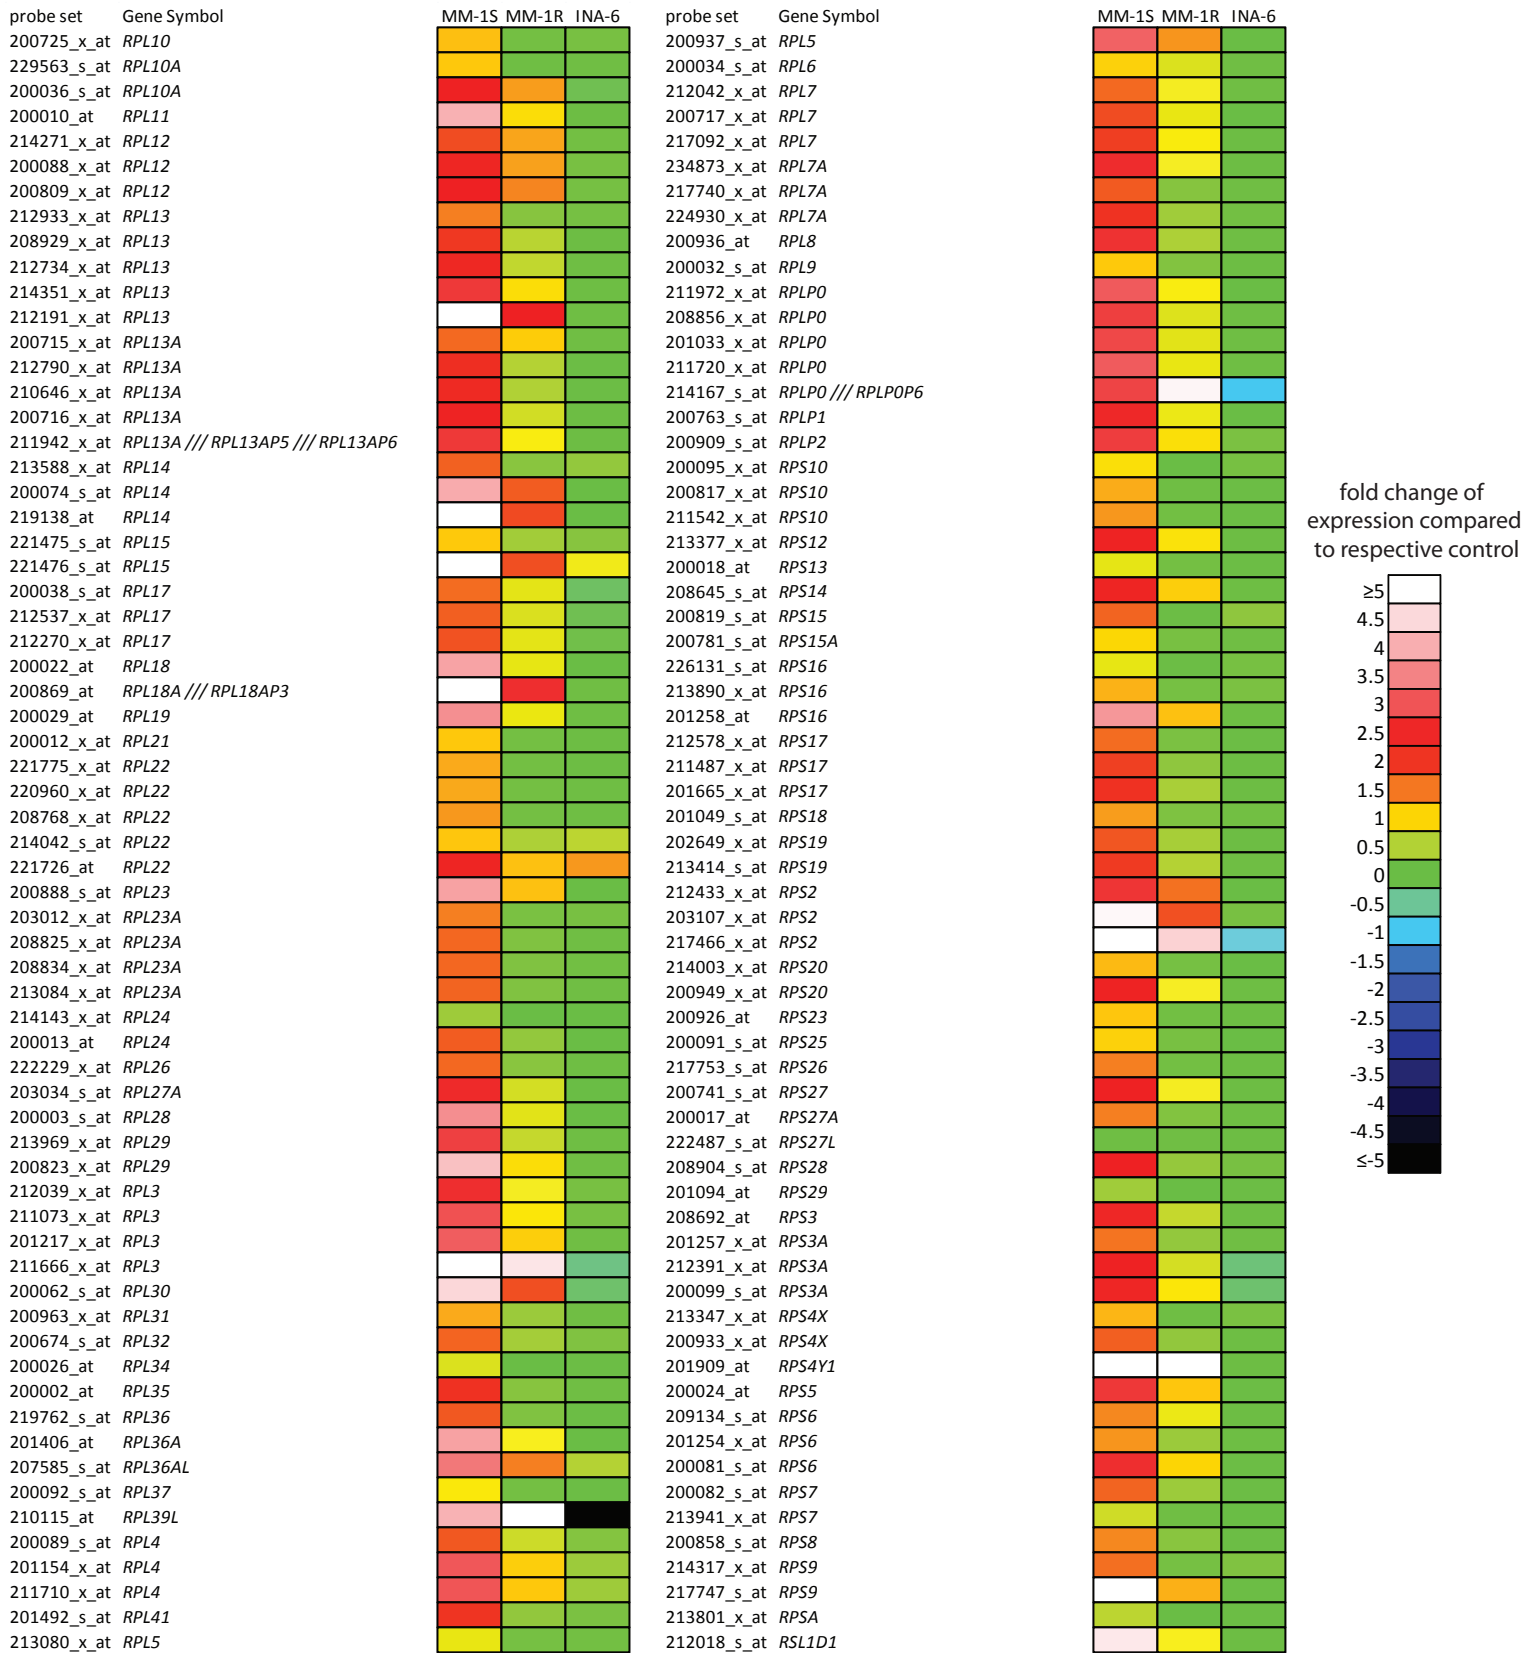

Suppl. Table 2: A stroma-induced transcriptional signature associated with adverse clinical outcome in Dex-treated myeloma patients

| Probe set   | Description          | Gene                                                                                       |
|-------------|----------------------|--------------------------------------------------------------------------------------------|
| 227404_s_at | EGR1                 | EGR1: Early growth response 1                                                              |
| 201041_s_at | DUSP1                | DUSP1: dual specificity phosphatase 1                                                      |
| 225681_at   | CTHRC1               | CTHRC1: collagen triple helix repeat containing 1                                          |
| 200797_s_at | MCL1                 | MCL1: myeloid cell leukemia sequence 1 (BCL2-related)                                      |
| 208763_s_at | TSC22D3              | TSC22D3: TSC22 domain family, member 3                                                     |
| 224558_s_at | MALAT1               | MALAT1: metastasis associated lung adenocarcinoma transcript 1 (non-coding RNA)            |
| 225912_at   | TP53INP1             | TP53INP1: tumor protein p53 inducible nuclear protein 1                                    |
| 224566_at   | TncRNA               | TncRNA: trophoblast-derived noncoding RNA                                                  |
| 201464_x_at | JUN                  | JUN: v-jun sarcoma virus 17 oncogene homolog (avian)                                       |
| 214022_s_at | IFITM1               | IFITM1: interferon induced transmembrane protein 1 (9-27)                                  |
| 209457_at   | DUSP5                | DUSP5: dual specificity phosphatase 5                                                      |
| 201010_s_at | TXNIP                | TXNIP: thioredoxin interacting protein                                                     |
| 219371_s_at | KLF2                 | KLF2: Kruppel-like factor 2 (lung)                                                         |
| 209189_at   | FOS                  | FOS: v-fos FBJ murine osteosarcoma viral oncogene homolog                                  |
| 205483_s_at | ISG15                | ISG15: ISG15 ubiquitin-like modifier                                                       |
| 217983_s_at | RNASET2              | RNASET2: ribonuclease T2                                                                   |
| 227189_at   | CPNE5                | CPNE5: copine V                                                                            |
| 202388_at   | RGS2                 | RGS2: regulator of G-protein signalling 2, 24kDa                                           |
| 225032_at   | FNDC3B               | FNDC3B: fibronectin type III domain containing 3B                                          |
| 222975_s_at | CSDE1                | CSDE1: cold shock domain containing E1, RNA-binding                                        |
| 224565_at   | TncRNA               | TncRNA: trophoblast-derived noncoding RNA                                                  |
| 212099_at   | RHOB                 | RHOB: ras homolog gene family, member B                                                    |
| 208078_s_at | SNF1LK               | SNF1LK: SNF1-like kinase /// SNF1-like kinase                                              |
| 207761_s_at | METTL7A              | METTL7A: methyltransferase like 7A                                                         |
| 216834_at   | RGS1                 | RGS1: regulator of G-protein signalling 1                                                  |
| 202081_at   | IER2                 | IER2: immediate early response 2                                                           |
| 217984_at   | RNASET2              | RNASET2: ribonuclease T2                                                                   |
| 201601_x_at | IFITM1               | IFITM1: interferon induced transmembrane protein 1 (9-27)                                  |
| 204415_at   | IFI6                 | IFI6: interferon, alpha-inducible protein 6                                                |
| 226982_at   | ELL2                 | ELL2: elongation factor, RNA polymerase II, 2                                              |
| 239901_at   | ---                  | FLJ43663: Hypothetical protein FLJ43663                                                    |
| 217783_s_at | YPEL5                | YPEL5: yippee-like 5 (Drosophila)                                                          |
| 224690_at   | C20orf108            | C20orf108: chromosome 20 open reading frame 108                                            |
| 202086_at   | MX1                  | MX1: myxovirus (influenza virus) resistance 1, interferon-inducible protein p78 (mouse)    |
| 225606_at   | BCL2L11              | BCL2L11: BCL2-like 11 (apoptosis facilitator)                                              |
| 200811_at   | CIRBP                | CIRBP: cold inducible RNA binding protein                                                  |
| 201236_s_at | BTG2                 | BTG2: BTG family, member 2                                                                 |
| 222420_s_at | UBE2H                | UBE2H: ubiquitin-conjugating enzyme E2H (UBC8 homolog, yeast)                              |
| 225390_s_at | KLF13                | KLF13: Kruppel-like factor 13                                                              |
| 200645_at   | GABARAP              | GABARAP: GABA(A) receptor-associated protein                                               |
| 224783_at   | FAM100B              | FAM100B: family with sequence similarity 100, member B                                     |
| 200921_s_at | BTG1                 | BTG1: B-cell translocation gene 1, anti-proliferative                                      |
| 223218_s_at | NFKBIZ               | NFKBIZ: nuclear factor of kappa light polypeptide gene enhancer in B-cells inhibitor, zeta |
| 223649_s_at | SLC25A39             | CGI-69: CGI-69 protein                                                                     |
| 200798_x_at | MCL1                 | MCL1: myeloid cell leukemia sequence 1 (BCL2-related)                                      |
| 226117_at   | TIFA                 | TIFA: TRAF-interacting protein with a forkhead-associated domain                           |
| 210592_s_at | SAT1                 | SAT1: spermidine/spermine N1-acetyltransferase 1                                           |
| 208961_s_at | KLF6                 | KLF6: Kruppel-like factor 6                                                                |
| 226905_at   | FAM101B              | FAM101B: family with sequence similarity 101, member B                                     |
| 226835_s_at | C20orf199 /// TALDO1 | TALDO1 /// C20orf199: transaldolase 1 /// chromosome 20 open reading frame 199             |
| 222528_s_at | SLC25A37             | SLC25A37: solute carrier family 25, member 37                                              |
| 221726_at   | RPL22                | RPL22: ribosomal protein L22                                                               |
| 226440_at   | DUSP22               | DUSP22: Dual specificity phosphatase 22                                                    |
| 200887_s_at | STAT1                | STAT1: signal transducer and activator of transcription 1, 91kDa                           |
| 202084_s_at | SEC14L1              | SEC14L1: SEC14-like 1 (S. cerevisiae)                                                      |
| 203725_at   | GADD45A              | GADD45A: growth arrest and DNA-damage-inducible, alpha                                     |
| 210046_s_at | IDH2                 | IDH2: isocitrate dehydrogenase 2 (NADP+), mitochondrial                                    |
| 208656_s_at | CCNI                 | CCNI: cyclin I                                                                             |
| 217728_at   | S100A6               | S100A6: S100 calcium binding protein A6 (calcylin)                                         |

Suppl. Table 2: A stroma-induced transcriptional signature associated with adverse clinical outcome in Dex-treated myeloma patients

|             |           |                                                                                                                                                                                                                                |
|-------------|-----------|--------------------------------------------------------------------------------------------------------------------------------------------------------------------------------------------------------------------------------|
| 202411_at   | IFI27     | IFI27: interferon, alpha-inducible protein 27                                                                                                                                                                                  |
| 200001_at   | CAPNS1    | CAPNS1: calpain, small subunit 1 /// calpain, small subunit 1                                                                                                                                                                  |
| 227558_at   | CBX4      | CBX4: chromobox homolog 4 (Pc class homolog, Drosophila)                                                                                                                                                                       |
| 223217_s_at | NFKBIZ    | NFKBIZ: nuclear factor of kappa light polypeptide gene enhancer in B-cells inhibitor, zeta                                                                                                                                     |
| 233571_x_at | C20orf149 | C20orf149: chromosome 20 open reading frame 149                                                                                                                                                                                |
| 201531_at   | ZFP36     | ZFP36: zinc finger protein 36, C3H type, homolog (mouse)                                                                                                                                                                       |
| 210563_x_at | CFLAR     | CFLAR: CASP8 and FADD-like apoptosis regulator                                                                                                                                                                                 |
| 212956_at   | TBC1D9    | TBC1D9: TBC1 domain family, member 9 (with GRAM domain)                                                                                                                                                                        |
| 221479_s_at | BNIP3L    | BNIP3L: BCL2/adenovirus E1B 19kDa interacting protein 3-like                                                                                                                                                                   |
| 217918_at   | DYNLRB1   | DYNLRB1: dynein, light chain, roadblock-type 1                                                                                                                                                                                 |
| 206574_s_at | PTP4A3    | PTP4A3: protein tyrosine phosphatase type IVA, member 3                                                                                                                                                                        |
| 227337_at   | ANKRD37   | ANKRD37: ankyrin repeat domain 37                                                                                                                                                                                              |
| 204805_s_at | H1FX      | H1FX: H1 histone family, member X                                                                                                                                                                                              |
| 202201_at   | BLVRB     | BLVRB: biliverdin reductase B (flavin reductase (NADPH))                                                                                                                                                                       |
| 224967_at   | UGCG      | UGCG: UDP-glucose ceramide glucosyltransferase                                                                                                                                                                                 |
| 230793_at   | LRRC16    | LRRC16: leucine rich repeat containing 16                                                                                                                                                                                      |
| 224889_at   | FOXO3     | FOXO3A: forkhead box O3A                                                                                                                                                                                                       |
| 201315_x_at | IFITM2    | IFITM2: interferon induced transmembrane protein 2 (1-8D)                                                                                                                                                                      |
| 226858_at   | CSNK1E    | CSNK1E: Casein kinase 1, epsilon                                                                                                                                                                                               |
| 203097_s_at | RAPGEF2   | RAPGEF2: Rap guanine nucleotide exchange factor (GEF) 2                                                                                                                                                                        |
| 202391_at   | BASP1     | BASP1: brain abundant, membrane attached signal protein 1                                                                                                                                                                      |
| 225012_at   | HDLBP     | HDLBP: high density lipoprotein binding protein (vigilin)                                                                                                                                                                      |
| 208655_at   | CCNI      | CCNI: Cyclin I                                                                                                                                                                                                                 |
| 225245_x_at | H2AFJ     | H2AFJ: H2A histone family, member J                                                                                                                                                                                            |
| 244050_at   | PTPLAD2   | PTPLAD2: protein tyrosine phosphatase-like A domain containing 2                                                                                                                                                               |
| 226702_at   | LOC129607 | LOC129607: hypothetical protein LOC129607                                                                                                                                                                                      |
| 229963_at   | BEX5      | NGFRAP1L1: NGFRAP1-like 1                                                                                                                                                                                                      |
| 228415_at   | ---       | gb:AA205444 /DB_XREF=gi:1803434 /DB_XREF=zq66c06.s1 /CLONE=IMAGE:646570 /FEA=EST /CNT=27 /TID=Hs.40368.2 /TIER=Stack /STK=21 /UG=Hs.40368 /LL=8905 /UG_GENE=AP1S2 /UG_TITLE=adaptor-related protein complex 1, sigma 2 subunit |
| 209166_s_at | MAN2B1    | MAN2B1: mannosidase, alpha, class 2B, member 1                                                                                                                                                                                 |
| 224785_at   | FAM100B   | FAM100B: family with sequence similarity 100, member B                                                                                                                                                                         |
| 229450_at   | IFIT3     | gb:A1075407 /DB_XREF=gi:3399978 /DB_XREF=oz56e10.x1 /CLONE=IMAGE:1679370 /FEA=EST /CNT=14 /TID=Hs.296083.0 /TIER=Stack /STK=9 /UG=Hs.296083 /UG_TITLE=ESTs                                                                     |
| 226876_at   | FAM101B   | FAM101B: family with sequence similarity 101, member B                                                                                                                                                                         |
| 226025_at   | ANKRD28   | ANKRD28: ankyrin repeat domain 28                                                                                                                                                                                              |
| 225415_at   | DTX3L     | DTX3L: deltex 3-like (Drosophila)                                                                                                                                                                                              |
| 224301_x_at | H2AFJ     | H2AFJ: H2A histone family, member J                                                                                                                                                                                            |
| 228993_s_at | LOC92482  | LOC92482: hypothetical protein LOC92482                                                                                                                                                                                        |
| 228167_at   | KLHL6     | KLHL6: kelch-like 6 (Drosophila)                                                                                                                                                                                               |
| 222472_at   | AFTPH     | AFTPH: aftiphilin                                                                                                                                                                                                              |
| 227621_at   | ---       | WTAP: Wilms tumor 1 associated protein                                                                                                                                                                                         |
| 202442_at   | AP3S1     | AP3S1: adaptor-related protein complex 3, sigma 1 subunit                                                                                                                                                                      |
| 212697_at   | FAM134C   | LOC162427: hypothetical protein LOC162427                                                                                                                                                                                      |
| 202887_s_at | DDIT4     | DDIT4: DNA-damage-inducible transcript 4                                                                                                                                                                                       |
| 212203_x_at | IFITM3    | IFITM3: interferon induced transmembrane protein 3 (1-8U)                                                                                                                                                                      |
| 200782_at   | ANXA5     | ANXA5: annexin A5                                                                                                                                                                                                              |
| 217917_s_at | DYNLRB1   | DYNLRB1: dynein, light chain, roadblock-type 1                                                                                                                                                                                 |
| 219888_at   | SPAG4     | SPAG4: sperm associated antigen 4                                                                                                                                                                                              |
| 226146_at   | ---       | CDNA clone IMAGE:5294560                                                                                                                                                                                                       |
| 227749_at   | ---       | POU2F2: POU domain, class 2, transcription factor 2                                                                                                                                                                            |
| 201390_s_at | CSNK2B    | CSNK2B: casein kinase 2, beta polypeptide                                                                                                                                                                                      |
| 208771_s_at | LTA4H     | LTA4H: leukotriene A4 hydrolase                                                                                                                                                                                                |
| 200643_at   | HDLBP     | HDLBP: high density lipoprotein binding protein (vigilin)                                                                                                                                                                      |
| 212593_s_at | PDCD4     | PDCD4: programmed cell death 4 (neoplastic transformation inhibitor)                                                                                                                                                           |
| 224602_at   | LOC401152 | LOC401152: HCV F-transactivated protein 1                                                                                                                                                                                      |
| 225282_at   | SMAP1L    | SMAP1L: stromal membrane-associated protein 1-like                                                                                                                                                                             |
| 231647_s_at | FCRL5     | FCRL5: Fc receptor-like 5                                                                                                                                                                                                      |
| 200678_x_at | GRN       | GRN: granulin                                                                                                                                                                                                                  |
| 225058_at   | GPR108    | GPR108: G protein-coupled receptor 108                                                                                                                                                                                         |

Suppl. Table 2: A stroma-induced transcriptional signature associated with adverse clinical outcome in Dex-treated myeloma patients

|             |           |                                                                                                                                                                                                                                                     |
|-------------|-----------|-----------------------------------------------------------------------------------------------------------------------------------------------------------------------------------------------------------------------------------------------------|
| 225074_at   | RAB2B     | RAB2B: RAB2B, member RAS oncogene family                                                                                                                                                                                                            |
| 201832_s_at | USO1      | PAK1 /// VDP: p21/Cdc42/Rac1-activated kinase 1 (STE20 homolog, yeast) /// vesicle docking protein p115                                                                                                                                             |
| 226005_at   | UBE2G1    | UBE2G1: ubiquitin-conjugating enzyme E2G 1 (UBC7 homolog, yeast)                                                                                                                                                                                    |
| 209606_at   | PSCDBP    | PSCDBP: pleckstrin homology, Sec7 and coiled-coil domains, binding protein /// pleckstrin homology, Sec7 and coiled-coil domains, binding protein                                                                                                   |
| 225929_s_at | RNF213    | C17orf27: chromosome 17 open reading frame 27                                                                                                                                                                                                       |
| 208865_at   | CSNK1A1   | CSNK1A1: casein kinase 1, alpha 1                                                                                                                                                                                                                   |
| 201285_at   | MKRN1     | MKRN1: makorin, ring finger protein, 1 /// makorin, ring finger protein, 1                                                                                                                                                                          |
| 208640_at   | RAC1      | RAC1: ras-related C3 botulinum toxin substrate 1 (rho family, small GTP binding protein Rac1)                                                                                                                                                       |
| 222449_at   | TMEPAI    | TMEPAI: transmembrane, prostate androgen induced RNA                                                                                                                                                                                                |
| 208308_s_at | GPI       | GPI: glucose phosphate isomerase                                                                                                                                                                                                                    |
| 208796_s_at | CCNG1     | CCNG1: cyclin G1                                                                                                                                                                                                                                    |
| 200872_at   | S100A10   | S100A10: S100 calcium binding protein A10 (annexin II ligand, calpactin I, light polypeptide (p11))                                                                                                                                                 |
| 202364_at   | MXI1      | MXI1: MAX interactor 1 /// MAX interactor 1                                                                                                                                                                                                         |
| 227677_at   | JAK3      | JAK3: Janus kinase 3 (a protein tyrosine kinase, leukocyte)                                                                                                                                                                                         |
| 227533_at   | ---       | RALGPS2: Ral GEF with PH domain and SH3 binding motif 2                                                                                                                                                                                             |
| 225576_at   | C6orf72   | C6orf72: chromosome 6 open reading frame 72                                                                                                                                                                                                         |
| 223014_at   | UBE2R2    | UBE2R2: ubiquitin-conjugating enzyme E2R 2                                                                                                                                                                                                          |
| 201527_at   | ATP6V1F   | ATP6V1F: ATPase, H+ transporting, lysosomal 14kDa, V1 subunit F                                                                                                                                                                                     |
| 214359_s_at | HSP90AB1  | HSP90AB1: heat shock protein 90kDa alpha (cytosolic), class B member 1                                                                                                                                                                              |
| 201693_s_at | EGR1      | EGR1: early growth response 1                                                                                                                                                                                                                       |
| 224981_at   | LOC124446 | LOC124446: hypothetical protein BC017488                                                                                                                                                                                                            |
| 226779_at   | ---       | CDNA FLJ37302 fis, clone BRAMY2016009                                                                                                                                                                                                               |
| 223179_at   | YPEL3     | YPEL3: yippee-like 3 (Drosophila)                                                                                                                                                                                                                   |
| 224502_s_at | KIAA1191  | KIAA1191: KIAA1191 /// KIAA1191                                                                                                                                                                                                                     |
| 223318_s_at | ALKBH7    | ALKBH7: alkB, alkylation repair homolog 7 (E. coli)                                                                                                                                                                                                 |
| 225265_at   | RBMS1     | RBMS1 /// C2orf12 /// LOC648293: RNA binding motif, single stranded interacting protein 1 /// chromosome 2 open reading frame 12 /// region containing chromosome 2 open reading frame 12; RNA binding motif, single stranded interacting protein 1 |
| 201360_at   | CST3      | CST3: cystatin C (amyloid angiopathy and cerebral hemorrhage)                                                                                                                                                                                       |
| 231035_s_at | ---       | Transcribed locus                                                                                                                                                                                                                                   |
| 227067_x_at | NOTCH2NL  | NOTCH2NL: Notch homolog 2 (Drosophila) N-terminal like                                                                                                                                                                                              |
| 213281_at   | JUN       | JUN: v-jun sarcoma virus 17 oncogene homolog (avian)                                                                                                                                                                                                |
| 228256_s_at | EPB41L4A  | EPB41L4A: erythrocyte membrane protein band 4.1 like 4A                                                                                                                                                                                             |
| 223436_s_at | TRPT1     | TRPT1: tRNA phosphotransferase 1                                                                                                                                                                                                                    |
| 201427_s_at | SEPP1     | SEPP1: selenoprotein P, plasma, 1                                                                                                                                                                                                                   |
| 225582_at   | KIAA1754  | KIAA1754: KIAA1754                                                                                                                                                                                                                                  |
| 233632_s_at | XRN1      | XRN1: 5'-3' exoribonuclease 1                                                                                                                                                                                                                       |
| 230405_at   | LOC441108 | RAD50: RAD50 homolog (S. cerevisiae)                                                                                                                                                                                                                |
| 225019_at   | CAMK2D    | CAMK2D: calcium/calmodulin-dependent protein kinase (CaM kinase) II delta                                                                                                                                                                           |
| 200760_s_at | ARL6IP5   | ARL6IP5: ADP-ribosylation-like factor 6 interacting protein 5                                                                                                                                                                                       |
| 225793_at   | LIX1L     | LIX1L: Lix1 homolog (mouse) like                                                                                                                                                                                                                    |
| 226914_at   | ARPC5L    | ARPC5L: actin related protein 2/3 complex, subunit 5-like                                                                                                                                                                                           |
| 203882_at   | IRF9      | ISGF3G: interferon-stimulated transcription factor 3, gamma 48kDa                                                                                                                                                                                   |
| 212481_s_at | TPM4      | TPM4: tropomyosin 4                                                                                                                                                                                                                                 |
| 201466_s_at | JUN       | JUN: v-jun sarcoma virus 17 oncogene homolog (avian)                                                                                                                                                                                                |
| 203455_s_at | SAT1      | SAT1: spermidine/spermine N1-acetyltransferase 1                                                                                                                                                                                                    |
| 225898_at   | WDR54     | WDR54: WD repeat domain 54                                                                                                                                                                                                                          |
| 235308_at   | ZBTB20    | ZBTB20: zinc finger and BTB domain containing 20                                                                                                                                                                                                    |
| 221704_s_at | VPS37B    | VPS37B: vacuolar protein sorting 37 homolog B (S. cerevisiae) /// vacuolar protein sorting 37 homolog B (S. cerevisiae)                                                                                                                             |
| 235061_at   | PPM1K     | PPM1K: protein phosphatase 1K (PP2C domain containing)                                                                                                                                                                                              |
| 201669_s_at | MARCKS    | MARCKS: myristoylated alanine-rich protein kinase C substrate                                                                                                                                                                                       |
| 225183_at   | C16orf72  | C16orf72: chromosome 16 open reading frame 72                                                                                                                                                                                                       |
| 218678_at   | NES       | NES: nestin                                                                                                                                                                                                                                         |
| 200839_s_at | CTSB      | CTSB: cathepsin B                                                                                                                                                                                                                                   |
| 224701_at   | PARP14    | PARP14: poly (ADP-ribose) polymerase family, member 14                                                                                                                                                                                              |



Suppl. Table 2: A stroma-induced transcriptional signature associated with adverse clinical outcome in Dex-treated myeloma patients

|             |          |                                                                                                                                                                                                                   |
|-------------|----------|-------------------------------------------------------------------------------------------------------------------------------------------------------------------------------------------------------------------|
| 225373_at   | C10orf54 | C10orf54: chromosome 10 open reading frame 54                                                                                                                                                                     |
| 209357_at   | CITED2   | CITED2: Cbp/p300-interacting transactivator, with Glu/Asp-rich carboxy-terminal domain, 2                                                                                                                         |
| 223754_at   | MGC13057 | MGC13057: hypothetical protein MGC13057                                                                                                                                                                           |
| 224643_at   | PRRC1    | PRRC1: proline-rich coiled-coil 1                                                                                                                                                                                 |
| 210036_s_at | KCNH2    | KCNH2: potassium voltage-gated channel, subfamily H (eag-related), member 2                                                                                                                                       |
| 208891_at   | DUSP6    | DUSP6: dual specificity phosphatase 6                                                                                                                                                                             |
| 200704_at   | LITAF    | LITAF: lipopolysaccharide-induced TNF factor                                                                                                                                                                      |
| 227279_at   | TCEAL3   | TCEAL3: transcription elongation factor A (SII)-like 3                                                                                                                                                            |
| 212501_at   | CEBPB    | CEBPB: CCAAT/enhancer binding protein (C/EBP), beta                                                                                                                                                               |
| 200621_at   | CSRP1    | CSRP1: cysteine and glycine-rich protein 1                                                                                                                                                                        |
| 208886_at   | H1FO     | H1FO: H1 histone family, member 0                                                                                                                                                                                 |
| 209846_s_at | BTN3A2   | BTN3A2: butyrophilin, subfamily 3, member A2                                                                                                                                                                      |
| 224949_at   | YIPF5    | YIPF5: Yip1 domain family, member 5                                                                                                                                                                               |
| 210470_x_at | NONO     | NONO: non-POU domain containing, octamer-binding                                                                                                                                                                  |
| 200778_s_at | SEPT2    | SEPT2: septin 2                                                                                                                                                                                                   |
| 201174_s_at | TERF2IP  | TERF2IP: telomeric repeat binding factor 2, interacting protein                                                                                                                                                   |
| 209786_at   | HMGN4    | HMGN4: high mobility group nucleosomal binding domain 4                                                                                                                                                           |
| 225063_at   | UBL7     | UBL7: ubiquitin-like 7 (bone marrow stromal cell-derived)                                                                                                                                                         |
| 224367_at   | BEX2     | BEX2: brain expressed X-linked 2 /// brain expressed X-linked 2                                                                                                                                                   |
| 225897_at   | MARCKS   | Homo sapiens, clone IMAGE:5547644, mRNA                                                                                                                                                                           |
| 225522_at   | AAK1     | AAK1: AP2 associated kinase 1                                                                                                                                                                                     |
| 226650_at   | ZFAND2A  | ZFAND2A: zinc finger, AN1-type domain 2A                                                                                                                                                                          |
| 243465_at   | ---      | TMEM140: Transmembrane protein 140                                                                                                                                                                                |
| 222921_s_at | HEY2     | HEY2: hairy/enhancer-of-split related with YRPW motif 2                                                                                                                                                           |
| 224927_at   | KIAA1949 | KIAA1949: KIAA1949                                                                                                                                                                                                |
| 225102_at   | MGLL     | MGLL: monoglyceride lipase                                                                                                                                                                                        |
| 223135_s_at | BBX      | BBX: bobby sox homolog (Drosophila)                                                                                                                                                                               |
| 214039_s_at | LAPTM4B  | LAPTM4B: lysosomal associated protein transmembrane 4 beta                                                                                                                                                        |
| 201642_at   | IFNGR2   | IFNGR2: interferon gamma receptor 2 (interferon gamma transducer 1)                                                                                                                                               |
| 202988_s_at | RGS1     | RGS1: regulator of G-protein signalling 1                                                                                                                                                                         |
| 210142_x_at | FLOT1    | FLOT1: flotillin 1                                                                                                                                                                                                |
| 202284_s_at | CDKN1A   | CDKN1A: cyclin-dependent kinase inhibitor 1A (p21, Cip1)                                                                                                                                                          |
| 226007_at   | ISCA2    | HBLD1: HESB like domain containing 1                                                                                                                                                                              |
| 226456_at   | C16orf75 | C16orf75: chromosome 16 open reading frame 75                                                                                                                                                                     |
| 201029_s_at | CD99     | CD99: CD99 molecule                                                                                                                                                                                               |
| 224707_at   | C5orf32  | ORF1-FL49: putative nuclear protein ORF1-FL49                                                                                                                                                                     |
| 202336_s_at | PAM      | PAM: peptidylglycine alpha-amidating monooxygenase                                                                                                                                                                |
| 201678_s_at | C3orf37  | C3orf37: chromosome 3 open reading frame 37                                                                                                                                                                       |
| 201885_s_at | CYB5R3   | CYB5R3: cytochrome b5 reductase 3                                                                                                                                                                                 |
| 231807_at   | KIAA1217 | KIAA1217: KIAA1217                                                                                                                                                                                                |
| 225001_at   | RAB3D    | RAB3D: RAB3D, member RAS oncogene family                                                                                                                                                                          |
| 224759_s_at | C12orf23 | C12orf23: chromosome 12 open reading frame 23                                                                                                                                                                     |
| 223046_at   | EGLN1    | EGLN1: egl nine homolog 1 (C. elegans)                                                                                                                                                                            |
| 225294_s_at | TRAPPC1  | TRAPPC1: trafficking protein particle complex 1                                                                                                                                                                   |
| 202973_x_at | FAM13A1  | FAM13A1: family with sequence similarity 13, member A1                                                                                                                                                            |
| 223287_s_at | FOXP1    | FOXP1: forkhead box P1                                                                                                                                                                                            |
| 212185_x_at | MT2A     | MT2A: metallothionein 2A                                                                                                                                                                                          |
| 203445_s_at | CTDSP2   | CTDSP2: CTD (carboxy-terminal domain, RNA polymerase II, polypeptide A) small phosphatase 2                                                                                                                       |
| 225230_at   | TMEM77   | TMEM77: transmembrane protein 77                                                                                                                                                                                  |
| 222421_at   | UBE2H    | UBE2H: ubiquitin-conjugating enzyme E2H (UBC8 homolog, yeast)                                                                                                                                                     |
| 209193_at   | PIM1     | PIM1: pim-1 oncogene /// pim-1 oncogene                                                                                                                                                                           |
| 223220_s_at | PARP9    | PARP9: poly (ADP-ribose) polymerase family, member 9                                                                                                                                                              |
| 224663_s_at | CFL2     | CFL2: cofilin 2 (muscle)                                                                                                                                                                                          |
| 226806_s_at | ---      | gb:AW022607 /DB_XREF=gi:5876137 /DB_XREF=df41c06.y1 /CLONE=IMAGE:2486002 /FEA=EST /CNT=49 /TID=Hs.12482.1 /TIER=Stack /STK=27 /UG=Hs.12482 /LL=8443 /UG_GENE=GNPAT /UG_TITLE=glyceronephosphate O-acyltransferase |
| 201473_at   | JUNB     | JUNB: jun B proto-oncogene                                                                                                                                                                                        |
| 225629_s_at | ZBTB4    | ZBTB4: zinc finger and BTB domain containing 4                                                                                                                                                                    |
| 206896_s_at | GNG7     | GNG7: guanine nucleotide binding protein (G protein), gamma 7                                                                                                                                                     |

Suppl. Table 2: A stroma-induced transcriptional signature associated with adverse clinical outcome in Dex-treated myeloma patients

|             |          |                                                                                                                                                                          |
|-------------|----------|--------------------------------------------------------------------------------------------------------------------------------------------------------------------------|
| 227609_at   | EPST11   | EPST11: epithelial stromal interaction 1 (breast)                                                                                                                        |
| 201176_s_at | ARCN1    | ARCN1: archain 1                                                                                                                                                         |
| 224918_x_at | MGST1    | MGST1: microsomal glutathione S-transferase 1                                                                                                                            |
| 226895_at   | NFIC     | NFIC: Nuclear factor I/C (CCAAT-binding transcription factor)                                                                                                            |
| 206174_s_at | PPP6C    | PPP6C: protein phosphatase 6, catalytic subunit                                                                                                                          |
| 209344_at   | TPM4     | TPM4: tropomyosin 4                                                                                                                                                      |
| 202671_s_at | PDXK     | PDXK: pyridoxal (pyridoxine, vitamin B6) kinase                                                                                                                          |
| 200697_at   | HK1      | HK1: hexokinase 1                                                                                                                                                        |
| 222743_s_at | C11orf71 | C11orf71: chromosome 11 open reading frame 71                                                                                                                            |
| 220147_s_at | FAM60A   | FAM60A: family with sequence similarity 60, member A                                                                                                                     |
| 201161_s_at | CSDA     | CSDA: cold shock domain protein A                                                                                                                                        |
| 210401_at   | P2RX1    | P2RX1: purinergic receptor P2X, ligand-gated ion channel, 1                                                                                                              |
| 209034_at   | PNRC1    | PNRC1: proline-rich nuclear receptor coactivator 1                                                                                                                       |
| 208991_at   | STAT3    | STAT3: signal transducer and activator of transcription 3 (acute-phase response factor)                                                                                  |
| 207980_s_at | CITED2   | CITED2: Cbp/p300-interacting transactivator, with Glu/Asp-rich carboxy-terminal domain, 2                                                                                |
| 223389_s_at | ZNF581   | ZNF581: zinc finger protein 581                                                                                                                                          |
| 212041_at   | ATP6VOD1 | ATP6VOD1: ATPase, H+ transporting, lysosomal 38kDa, VO subunit d1                                                                                                        |
| 202120_x_at | AP2S1    | AP2S1: adaptor-related protein complex 2, sigma 1 subunit                                                                                                                |
| 219410_at   | TMEM45A  | TMEM45A: transmembrane protein 45A                                                                                                                                       |
| 217963_s_at | NGFRAP1  | NGFRAP1: nerve growth factor receptor (TNFRSF16) associated protein 1                                                                                                    |
| 217047_s_at | FAM13A1  | FAM13A1: family with sequence similarity 13, member A1                                                                                                                   |
| 213836_s_at | WIPI1    | WIPI1: WD repeat domain, phosphoinositide interacting 1                                                                                                                  |
| 224793_s_at | TGFBR1   | TGFBR1: transforming growth factor, beta receptor I (activin A receptor type II-like kinase, 53kDa)                                                                      |
| 228622_s_at | DNAJC4   | DNAJC4: DnaJ (Hsp40) homolog, subfamily C, member 4                                                                                                                      |
| 218450_at   | HEBP1    | HEBP1: heme binding protein 1                                                                                                                                            |
| 37028_at    | PPP1R15A | PPP1R15A: protein phosphatase 1, regulatory (inhibitor) subunit 15A                                                                                                      |
| 200997_at   | RBM4     | RBM4 /// LOC650029: RNA binding motif protein 4 /// similar to RNA-binding protein 4 (RNA-binding motif protein 4) (Lark homolog) (Hlark) (RNA-binding motif protein 4a) |
| 208892_s_at | DUSP6    | DUSP6: dual specificity phosphatase 6                                                                                                                                    |
| 201251_at   | PKM2     | PKM2: pyruvate kinase, muscle                                                                                                                                            |
| 218097_s_at | CUEDC2   | CUEDC2: CUE domain containing 2                                                                                                                                          |
| 217995_at   | SQRDL    | SQRDL: sulfide quinone reductase-like (yeast)                                                                                                                            |
| 223234_at   | MAD2L2   | MAD2L2: MAD2 mitotic arrest deficient-like 2 (yeast)                                                                                                                     |
| 224917_at   | MIRN21   | MIRN21: microRNA 21                                                                                                                                                      |
| 202324_s_at | ACBD3    | ACBD3: acyl-Coenzyme A binding domain containing 3                                                                                                                       |
| 214057_at   | MCL1     | MCL1: Myeloid cell leukemia sequence 1 (BCL2-related)                                                                                                                    |
| 200706_s_at | LITAF    | LITAF: lipopolysaccharide-induced TNF factor                                                                                                                             |
| 204285_s_at | PMAIP1   | PMAIP1: phorbol-12-myristate-13-acetate-induced protein 1                                                                                                                |
| 224452_s_at | MGC12966 | MGC12966: hypothetical protein LOC84792 /// hypothetical protein LOC84792                                                                                                |
| 227479_at   | KIAA1244 | KIAA1244: KIAA1244                                                                                                                                                       |
| 223269_at   | POLR3GL  | POLR3GL: polymerase (RNA) III (DNA directed) polypeptide G (32kD) like                                                                                                   |
| 225957_at   | CSorf41  | LOC153222: adult retina protein                                                                                                                                          |
| 218611_at   | IER5     | IER5: immediate early response 5                                                                                                                                         |
| 201841_s_at | HSPB1    | HSPB1 /// MEIS3: heat shock 27kDa protein 1 /// Meis1, myeloid ecotropic viral integration site 1 homolog 3 (mouse)                                                      |
| 226194_at   | C13orf8  | C13orf8: chromosome 13 open reading frame 8                                                                                                                              |
| 234725_s_at | SEMA4B   | SEMA4B: sema domain, immunoglobulin domain (Ig), transmembrane domain (TM) and short cytoplasmic domain, (semaphorin) 4B                                                 |
| 208436_s_at | IRF7     | IRF7: interferon regulatory factor 7                                                                                                                                     |
| 202252_at   | RAB13    | RAB13: RAB13, member RAS oncogene family                                                                                                                                 |
| 223461_at   | TBC1D7   | TBC1D7: TBC1 domain family, member 7                                                                                                                                     |
| 222407_s_at | ZFP106   | ZFP106: zinc finger protein 106 homolog (mouse)                                                                                                                          |
| 200789_at   | ECH1     | ECH1: enoyl Coenzyme A hydratase 1, peroxisomal                                                                                                                          |
| 201783_s_at | RELA     | RELA: v-rel reticuloendotheliosis viral oncogene homolog A, nuclear factor of kappa light polypeptide gene enhancer in B-cells 3, p65 (avian)                            |
| 223206_s_at | NMRAL1   | NMRAL1: NmrA-like family domain containing 1                                                                                                                             |
| 201903_at   | UQCRC1   | UQCRC1: ubiquinol-cytochrome c reductase core protein I                                                                                                                  |
| 225202_at   | RHOBTB3  | RHOBTB3: Rho-related BTB domain containing 3                                                                                                                             |
| 209685_s_at | PRKCB1   | PRKCB1: protein kinase C, beta 1                                                                                                                                         |

Suppl. Table 2: A stroma-induced transcriptional signature associated with adverse clinical outcome in Dex-treated myeloma patients

|             |                     |                                                                                                                           |
|-------------|---------------------|---------------------------------------------------------------------------------------------------------------------------|
| 224931_at   | SLC41A3             | SLC41A3: solute carrier family 41, member 3                                                                               |
| 223982_s_at | PNPLA8              | PNPLA8: patatin-like phospholipase domain containing 8                                                                    |
| 229390_at   | FAM26F              | RP1-93H18.5: hypothetical protein LOC441168                                                                               |
| 226267_at   | JDP2                | JDP2: jun dimerization protein 2                                                                                          |
| 221920_s_at | SLC25A37            | SLC25A37: solute carrier family 25, member 37                                                                             |
| 212012_at   | PXDN                | PXDN: peroxidasin homolog (Drosophila)                                                                                    |
| 225243_s_at | SLMAP               | SLMAP: sarcolemma associated protein                                                                                      |
| 202105_at   | IGBP1               | IGBP1: immunoglobulin (CD79A) binding protein 1                                                                           |
| 226094_at   | PIK3C2A             | PIK3C2A: phosphoinositide-3-kinase, class 2, alpha polypeptide                                                            |
| 227817_at   | PRKCB1              | PRKCB1: Protein kinase C, beta 1                                                                                          |
| 208908_s_at | CAST                | CAST: calpastatin                                                                                                         |
| 227697_at   | SOCS3               | SOCS3: suppressor of cytokine signaling 3                                                                                 |
| 209417_s_at | IFI35               | IFI35: interferon-induced protein 35                                                                                      |
| 228705_at   | CAPN12              | CAPN12: calpain 12                                                                                                        |
| 228284_at   | TLE1                | TLE1: Transducin-like enhancer of split 1 (E(sp1) homolog, Drosophila)                                                    |
| 213650_at   | GOLGA8A /// GOLGA8B | GOLGA8A /// GOLGA8B: golgi autoantigen, golgin subfamily a, 8A /// golgi autoantigen, golgin subfamily a, 8B              |
| 226726_at   | MBOAT2              | MBOAT2: membrane bound O-acyltransferase domain containing 2                                                              |
| 208717_at   | OXA1L               | OXA1L: oxidase (cytochrome c) assembly 1-like                                                                             |
| 225941_at   | EIF4E3              | EIF4E3: eukaryotic translation initiation factor 4E member 3                                                              |
| 228298_at   | FAM113B             | FAM113B: family with sequence similarity 113, member B                                                                    |
| 202672_s_at | ATF3                | ATF3: activating transcription factor 3                                                                                   |
| 219759_at   | ERAP2               | LRAP: leukocyte-derived arginine aminopeptidase                                                                           |
| 222826_at   | PLDN                | PLDN: pallidin homolog (mouse)                                                                                            |
| 221748_s_at | TNS1                | TNS1: tensin 1 /// tensin 1                                                                                               |
| 218603_at   | HECA                | HECA: headcase homolog (Drosophila)                                                                                       |
| 222993_at   | MRPL37              | MRPL37: mitochondrial ribosomal protein L37                                                                               |
| 225337_at   | ABHD2               | ABHD2: abhydrolase domain containing 2                                                                                    |
| 201828_x_at | FAM127A             | CXX1: CAAX box 1                                                                                                          |
| 215967_s_at | LY9                 | LY9: lymphocyte antigen 9                                                                                                 |
| 212724_at   | RND3                | RND3: Rho family GTPase 3                                                                                                 |
| 210978_s_at | TAGLN2              | TAGLN2: transgelin 2                                                                                                      |
| 201811_x_at | SH3BP5              | SH3BP5: SH3-domain binding protein 5 (BTK-associated)                                                                     |
| 201520_s_at | GRSF1               | GRSF1: G-rich RNA sequence binding factor 1                                                                               |
| 224352_s_at | CFL2                | CFL2: cofilin 2 (muscle) /// cofilin 2 (muscle)                                                                           |
| 218679_s_at | VPS28               | VPS28: vacuolar protein sorting 28 homolog (S. cerevisiae)                                                                |
| 226027_at   | C9orf119            | C9orf119: chromosome 9 open reading frame 119                                                                             |
| 205901_at   | PNOC                | PNOC: prepronociceptin                                                                                                    |
| 200613_at   | AP2M1               | AP2M1: adaptor-related protein complex 2, mu 1 subunit                                                                    |
| 217738_at   | PBEF1               | PBEF1 /// RP11-92J19.4: pre-B-cell colony enhancing factor 1 /// pre-B cell enhancing factor 1 pseudogene                 |
| 227168_at   | MIAT                | FLJ25967: hypothetical gene supported by AK098833                                                                         |
| 205990_s_at | WNT5A               | WNT5A: wingless-type MMTV integration site family, member 5A                                                              |
| 220937_s_at | ST6GALNAC4          | ST6GALNAC4: ST6 (alpha-N-acetyl-neuraminyl-2,3-beta-galactosyl-1,3)-N-acetylgalactosaminide alpha-2,6-sialyltransferase 4 |
| 200993_at   | IPO7                | IPO7: importin 7                                                                                                          |
| 223311_s_at | MTA3                | MTA3: metastasis associated 1 family, member 3                                                                            |
| 217900_at   | IARS2               | IARS2: isoleucine-tRNA synthetase 2, mitochondrial                                                                        |
| 202722_s_at | GFPT1               | GFPT1: glutamine-fructose-6-phosphate transaminase 1                                                                      |
| 208967_s_at | AK2                 | AK2: adenylate kinase 2                                                                                                   |
| 202403_s_at | COL1A2              | COL1A2: collagen, type I, alpha 2                                                                                         |
| 201999_s_at | DYNLT1              | DYNLT1: dynein, light chain, Tctex-type 1                                                                                 |
| 201462_at   | SCRN1               | SCRN1: secernin 1                                                                                                         |
| 223226_x_at | SSBP4               | SSBP4: single stranded DNA binding protein 4                                                                              |
| 227998_at   | S100A16             | S100A16: S100 calcium binding protein A16                                                                                 |
| 230259_at   | C10orf125           | C10orf125: chromosome 10 open reading frame 125                                                                           |
| 200632_s_at | NDRG1               | NDRG1: N-myc downstream regulated gene 1                                                                                  |
| 202166_s_at | PPP1R2              | PPP1R2: protein phosphatase 1, regulatory (inhibitor) subunit 2                                                           |
| 212914_at   | CBX7                | CBX7: chromobox homolog 7                                                                                                 |
| 210817_s_at | CALCOCO2            | CALCOCO2: calcium binding and coiled-coil domain 2                                                                        |

Suppl. Table 2: A stroma-induced transcriptional signature associated with adverse clinical outcome in Dex-treated myeloma patients

|             |                   |                                                                                                                       |
|-------------|-------------------|-----------------------------------------------------------------------------------------------------------------------|
| 227414_at   | RHBDD1            | RHBDD1: rhomboid domain containing 1                                                                                  |
| 221478_at   | BNIP3L            | BNIP3L: BCL2/adenovirus E1B 19kDa interacting protein 3-like /// BCL2/adenovirus E1B 19kDa interacting protein 3-like |
| 200666_s_at | DNAJB1            | DNAJB1: Dnal (Hsp40) homolog, subfamily B, member 1                                                                   |
| 205000_at   | DDX3Y             | DDX3Y: DEAD (Asp-Glu-Ala-Asp) box polypeptide 3, Y-linked                                                             |
| 219147_s_at | C9orf95           | C9orf95: chromosome 9 open reading frame 95                                                                           |
| 227325_at   | LOC255783         | LOC255783: hypothetical protein LOC255783                                                                             |
| 204881_s_at | UGCG              | UGCG: UDP-glucose ceramide glucosyltransferase                                                                        |
| 214211_at   | FBXO3             | FBXO3: forkhead box O3A                                                                                               |
| 201628_s_at | RRAGA             | RRAGA: Ras-related GTP binding A                                                                                      |
| 220990_s_at | MIRN21 /// TMEM49 | TMEM49 /// MIRN21: transmembrane protein 49 /// microRNA 21                                                           |
| 204132_s_at | FOXO3             | FOXO3A: forkhead box O3A                                                                                              |
| 233933_s_at | OTUD5             | OTUD5: OTU domain containing 5                                                                                        |
| 222451_s_at | ZDHHC9            | ZDHHC9: zinc finger, DHHC-type containing 9                                                                           |
| 202785_at   | NDUFA7            | NDUFA7: NADH dehydrogenase (ubiquinone) 1 alpha subcomplex, 7, 14.5kDa                                                |
| 227641_at   | FBXL16            | FBXL16: F-box and leucine-rich repeat protein 16                                                                      |
| 218042_at   | COPS4             | COPS4: COP9 constitutive photomorphogenic homolog subunit 4 (Arabidopsis)                                             |
| 228427_at   | FBXO16            | FBXO16: F-box protein 16                                                                                              |
| 212687_at   | LIMS1             | LIMS1: LIM and senescent cell antigen-like domains 1                                                                  |
| 205052_at   | AUH               | AUH: AU RNA binding protein/enoyl-Coenzyme A hydratase                                                                |
| 223394_at   | SERTAD1           | SERTAD1: SERTA domain containing 1                                                                                    |
| 218429_s_at | FLJ11286          | FLJ11286: hypothetical protein FLJ11286                                                                               |
| 207196_s_at | TNIP1             | TNIP1: TNFAIP3 interacting protein 1                                                                                  |
| 209061_at   | NCOA3             | NCOA3: nuclear receptor coactivator 3                                                                                 |
| 225080_at   | MYO1C             | MYO1C: Myosin IC                                                                                                      |
| 226134_s_at | ---               | Transcribed locus                                                                                                     |
| 218001_at   | MRPS2             | MRPS2: mitochondrial ribosomal protein S2                                                                             |
| 223290_at   | PDXP              | PDXP: pyridoxal (pyridoxine, vitamin B6) phosphatase                                                                  |
| 202083_s_at | SEC14L1           | SEC14L1: SEC14-like 1 (S. cerevisiae)                                                                                 |
| 226480_at   | KIF2A             | HSA9761: Dimethyladenosine transferase                                                                                |
| 222742_s_at | RABL5             | RABL5: RAB, member RAS oncogene family-like 5                                                                         |
| 224884_at   | AKAP13            | AKAP13: A kinase (PKA) anchor protein 13                                                                              |
| 226354_at   | LACTB             | LACTB: lactamase, beta                                                                                                |
| 208698_s_at | NONO              | NONO: non-POU domain containing, octamer-binding                                                                      |
| 212013_at   | PXDN              | PXDN: peroxidasin homolog (Drosophila)                                                                                |
| 211284_s_at | GRN               | GRN: granulin                                                                                                         |
| 209581_at   | HRASLS3           | HRASLS3: HRAS-like suppressor 3                                                                                       |
| 204752_x_at | PARP2             | PARP2: poly (ADP-ribose) polymerase family, member 2                                                                  |
| 210564_x_at | CFLAR             | CFLAR: CASP8 and FADD-like apoptosis regulator                                                                        |
| 222035_s_at | PAPOLA            | PAPOLA: poly(A) polymerase alpha                                                                                      |
| 202869_at   | OAS1              | OAS1: 2',5'-oligoadenylate synthetase 1, 40/46kDa                                                                     |
| 229164_s_at | ABTB1             | ABTB1: ankyrin repeat and BTB (POZ) domain containing 1                                                               |
| 201546_at   | TRIP12            | TRIP12: thyroid hormone receptor interactor 12                                                                        |
| 201425_at   | ALDH2             | ALDH2: aldehyde dehydrogenase 2 family (mitochondrial)                                                                |
| 225842_at   | PHLDA1            | PHLDA1: pleckstrin homology-like domain, family A, member 1                                                           |
| 203420_at   | FAM8A1            | FAM8A1: family with sequence similarity 8, member A1                                                                  |
| 238590_x_at | TMEM107           | TMEM107: transmembrane protein 107                                                                                    |
| 226331_at   | ---               | ARTC1 mRNA, complete sequence                                                                                         |
| 207198_s_at | LIMS1             | LIMS1: LIM and senescent cell antigen-like domains 1                                                                  |
| 224953_at   | YIPF5             | YIPF5: Yip1 domain family, member 5                                                                                   |
| 215333_x_at | GSTM1             | GSTM1: glutathione S-transferase M1                                                                                   |
| 224718_at   | YY1               | YY1: YY1 transcription factor                                                                                         |
| 225940_at   | EIF4E3            | EIF4E3: eukaryotic translation initiation factor 4E member 3                                                          |
| 211474_s_at | SERPINB6          | SERPINB6: serpin peptidase inhibitor, clade B (ovalbumin), member 6                                                   |
| 210844_x_at | CTNNA1            | CTNNA1: catenin (cadherin-associated protein), alpha 1, 102kDa                                                        |
| 203921_at   | CHST2             | CHST2: carbohydrate (N-acetylglucosamine-6-O) sulfotransferase 2                                                      |
| 223469_at   | PGPEP1            | PGPEP1: pyroglutamyl-peptidase I                                                                                      |
| 202119_s_at | CPNE3             | CPNE3: copine III                                                                                                     |
| 227020_at   | YPEL2             | YPEL2: yippee-like 2 (Drosophila)                                                                                     |
| 200923_at   | LGALS3BP          | LGALS3BP: lectin, galactoside-binding, soluble, 3 binding protein                                                     |

Suppl. Table 2: A stroma-induced transcriptional signature associated with adverse clinical outcome in Dex-treated myeloma patients

|             |                    |                                                                                                                                                                                                                            |
|-------------|--------------------|----------------------------------------------------------------------------------------------------------------------------------------------------------------------------------------------------------------------------|
| 209383_at   | DDIT3              | DDIT3: DNA-damage-inducible transcript 3                                                                                                                                                                                   |
| 203411_s_at | LMNA               | LMNA: lamin A/C                                                                                                                                                                                                            |
| 235134_at   | ---                | CDNA FLJ30156 fis, clone BRACE2000487                                                                                                                                                                                      |
| 205903_s_at | KCNN3              | KCNN3: potassium intermediate/small conductance calcium-activated channel, subfamily N, member 3                                                                                                                           |
| 222500_at   | PPIL1              | PPIL1: peptidylprolyl isomerase (cyclophilin)-like 1                                                                                                                                                                       |
| 226682_at   | LOC283666          | LOC283666: hypothetical protein LOC283666                                                                                                                                                                                  |
| 212473_s_at | MICAL2             | MICAL2: microtubule associated monooxygenase, calponin and LIM domain containing 2                                                                                                                                         |
| 225433_at   | GTF2A1             | GTF2A1: General transcription factor IIA, 1, 19/37kDa                                                                                                                                                                      |
| 207266_x_at | RBMS1              | RBMS1 /// LOC648293: RNA binding motif, single stranded interacting protein 1 /// region containing chromosome 2 open reading frame 12; RNA binding motif, single stranded interacting protein 1                           |
| 219270_at   | CHAC1              | CHAC1: ChaC, cation transport regulator-like 1 (E. coli)                                                                                                                                                                   |
| 202014_at   | PPP1R15A           | PPP1R15A: protein phosphatase 1, regulatory (inhibitor) subunit 15A                                                                                                                                                        |
| 202074_s_at | OPTN               | OPTN: optineurin                                                                                                                                                                                                           |
| 205081_at   | CRIP1              | CRIP1 /// GALK2: cysteine-rich protein 1 (intestinal) /// galactokinase 2                                                                                                                                                  |
| 209102_s_at | HBP1               | HBP1: HMG-box transcription factor 1                                                                                                                                                                                       |
| 207170_s_at | LETMD1             | LETMD1: LETM1 domain containing 1                                                                                                                                                                                          |
| 204141_at   | TUBB2A             | TUBB2A: tubulin, beta 2A                                                                                                                                                                                                   |
| 217873_at   | CAB39              | CAB39: calcium binding protein 39                                                                                                                                                                                          |
| 201050_at   | PLD3               | PLD3: phospholipase D family, member 3                                                                                                                                                                                     |
| 217202_s_at | GLUL               | GLUL: glutamate-ammonia ligase (glutamine synthetase)                                                                                                                                                                      |
| 203020_at   | RABGAP1L           | RABGAP1L: RAB GTPase activating protein 1-like                                                                                                                                                                             |
| 201810_s_at | SH3BP5             | SH3BP5: SH3-domain binding protein 5 (BTK-associated)                                                                                                                                                                      |
| 224857_s_at | POLR1D             | POLR1D: polymerase (RNA) I polypeptide D, 16kDa                                                                                                                                                                            |
| 224812_at   | HIBADH             | HIBADH: 3-hydroxyisobutyrate dehydrogenase                                                                                                                                                                                 |
| 200868_s_at | ZNF313             | ZNF313: zinc finger protein 313                                                                                                                                                                                            |
| 211928_at   | DYNC1H1            | DYNC1H1: dynein, cytoplasmic 1, heavy chain 1                                                                                                                                                                              |
| 221985_at   | KLHL24             | KLHL24: kelch-like 24 (Drosophila)                                                                                                                                                                                         |
| 202145_at   | LY6E               | LY6E: lymphocyte antigen 6 complex, locus E                                                                                                                                                                                |
| 227584_at   | NAV1               | NAV1: Neuron navigator 1                                                                                                                                                                                                   |
| 228483_s_at | TAF9B              | TAF9B: TAF9B RNA polymerase II, TATA box binding protein (TBP)-associated factor, 31kDa                                                                                                                                    |
| 64486_at    | CORO1B             | CORO1B: coronin, actin binding protein, 1B                                                                                                                                                                                 |
| 224772_at   | NAV1               | NAV1: neuron navigator 1                                                                                                                                                                                                   |
| 202545_at   | PRKCD              | PRKCD: protein kinase C, delta                                                                                                                                                                                             |
| 236150_at   | LOC123688          | LOC123688: similar to RIKEN cDNA C630028N24 gene                                                                                                                                                                           |
| 200799_at   | HSPA1A             | HSPA1A: heat shock 70kDa protein 1A                                                                                                                                                                                        |
| 223114_at   | COQ5               | COQ5: coenzyme Q5 homolog, methyltransferase (S. cerevisiae)                                                                                                                                                               |
| 234111_at   | ZNF81              | CDNA: FLJ23063 fis, clone LNG04745                                                                                                                                                                                         |
| 227200_at   | ---                | gb:AI871408 /DB_XREF=gi:5545457 /DB_XREF=wl81g09.x1 /CLONE=IMAGE:2431360 /FEA=EST /CNT=28 /TID=Hs.105636.0 /TIER=Stack /STK=19 /UG=Hs.105636 /UG_TITLE=ESTs                                                                |
| 201384_s_at | LOC727732 /// NBR1 | NBR1 /// LOC653347: neighbor of BRCA1 gene 1 /// similar to neighbor of BRCA1 gene 1                                                                                                                                       |
| 236655_at   | TPD52              | TPD52: tumor protein D52                                                                                                                                                                                                   |
| 205467_at   | CASP10             | CASP10: caspase 10, apoptosis-related cysteine peptidase                                                                                                                                                                   |
| 225024_at   | C20orf77           | C20orf77: chromosome 20 open reading frame 77                                                                                                                                                                              |
| 225743_at   | RPUSD3             | RPUSD3: RNA pseudouridylate synthase domain containing 3                                                                                                                                                                   |
| 200771_at   | LAMC1              | LAMC1: laminin, gamma 1 (formerly LAMB2)                                                                                                                                                                                   |
| 201729_s_at | KIAA0100           | KIAA0100: KIAA0100                                                                                                                                                                                                         |
| 223125_s_at | C1orf21            | C1orf21: chromosome 1 open reading frame 21                                                                                                                                                                                |
| 207571_x_at | C1orf38            | C1orf38: chromosome 1 open reading frame 38                                                                                                                                                                                |
| 229969_at   | ---                | gb:AV723931 /DB_XREF=gi:10827818 /DB_XREF=AV723931 /CLONE=HTBAQD04 /FEA=EST /CNT=13 /TID=Hs.26904.0 /TIER=Stack /STK=9 /UG=Hs.26904 /UG_TITLE=ESTs                                                                         |
| 223028_s_at | SNX9               | SNX9: sorting nexin 9                                                                                                                                                                                                      |
| 203999_at   | ---                | gb:AV731490 /DB_XREF=gi:10840911 /DB_XREF=AV731490 /CLONE=HTFAZD04 /FEA=FLmRNA /CNT=104 /TID=Hs.154679.0 /TIER=Stack /STK=16 /UG=Hs.154679 /LL=6857 /UG_GENE=SYT1 /UG_TITLE=synaptotagmin I /FL=gb:M55047.1 gb:NM_005639.1 |
| 200695_at   | PPP2R1A            | PPP2R1A: protein phosphatase 2 (formerly 2A), regulatory subunit A (PR 65), alpha isoform                                                                                                                                  |
| 219356_s_at | CHMP5              | CHMP5: chromatin modifying protein 5                                                                                                                                                                                       |

Suppl. Table 2: A stroma-induced transcriptional signature associated with adverse clinical outcome in Dex-treated myeloma patients

|             |                     |                                                                                                                                                                                                         |
|-------------|---------------------|---------------------------------------------------------------------------------------------------------------------------------------------------------------------------------------------------------|
| 226347_at   | ---                 | gb:AI754928 /DB_XREF=gi:5133192 /DB_XREF=cr32g12.x1 /CLONE=HBMSC_cr32g12 /FEA=mRNA /CNT=59 /TID=Hs.268231.0 /TIER=Stack /STK=12 /UG=Hs.268231 /UG_TITLE=Homo sapiens cDNA: FLJ23111 fis, clone LNG07835 |
| 229269_x_at | LOC646044 /// SSBP4 | SSBP4: single stranded DNA binding protein 4                                                                                                                                                            |
| 209868_s_at | RBMS1               | RBMS1 /// LOC648293: RNA binding motif, single stranded interacting protein 1 /// region containing chromosome 2 open reading frame 12; RNA binding motif, single stranded interacting protein 1        |
| 211458_s_at | GABARAPL1 /// GABA  | GABARAPL1 /// GABARAPL3: GABA(A) receptor-associated protein like 1 /// GABA(A) receptors associated protein like 3                                                                                     |
| 221962_s_at | UBE2H               | UBE2H: ubiquitin-conjugating enzyme E2H (UBC8 homolog, yeast)                                                                                                                                           |
| 203657_s_at | CTSF                | CTSF: cathepsin F                                                                                                                                                                                       |
| 225167_at   | FRMD4A              | FRMD4A: FERM domain containing 4A                                                                                                                                                                       |
| 235716_at   | ---                 | Transcribed locus                                                                                                                                                                                       |
| 209391_at   | DPM2                | DPM2: dolichyl-phosphate mannosyltransferase polypeptide 2, regulatory subunit                                                                                                                          |
| 202429_s_at | PPP3CA              | PPP3CA: protein phosphatase 3 (formerly 2B), catalytic subunit, alpha isoform (calcineurin A alpha)                                                                                                     |
| 215772_x_at | SUCLG2              | SUCLG2: succinate-CoA ligase, GDP-forming, beta subunit                                                                                                                                                 |
| 207738_s_at | NCKAP1              | NCKAP1: NCK-associated protein 1                                                                                                                                                                        |
| 224975_at   | NFIA                | NFIA: nuclear factor I/A                                                                                                                                                                                |
| 212459_x_at | SUCLG2              | SUCLG2: succinate-CoA ligase, GDP-forming, beta subunit                                                                                                                                                 |
| 215773_x_at | PARP2               | PARP2: poly (ADP-ribose) polymerase family, member 2                                                                                                                                                    |
| 200744_s_at | GNB1                | GNB1: guanine nucleotide binding protein (G protein), beta polypeptide 1                                                                                                                                |
| 217988_at   | CCNB1IP1            | CCNB1IP1: cyclin B1 interacting protein 1                                                                                                                                                               |
| 238547_at   | HEXIM2              | HEXIM2: hexamethylene bis-acetamide inducible 2                                                                                                                                                         |
| 209385_s_at | PROSC               | PROSC: proline synthetase co-transcribed homolog (bacterial)                                                                                                                                            |
| 223130_s_at | MYLIP               | MYLIP: myosin regulatory light chain interacting protein                                                                                                                                                |
| 201059_at   | CTTN                | CTTN: cortactin                                                                                                                                                                                         |
| 215565_at   | DTNB                | DTNB: dystrobrevin, beta                                                                                                                                                                                |
| 200622_x_at | CALM3               | CALM3: calmodulin 3 (phosphorylase kinase, delta)                                                                                                                                                       |
| 214453_s_at | IFI44               | IFI44: interferon-induced protein 44                                                                                                                                                                    |
| 225803_at   | FBXO32              | FBXO32: F-box protein 32                                                                                                                                                                                |
| 219525_at   | SLC47A1             | FLJ10847: hypothetical protein FLJ10847                                                                                                                                                                 |
| 200883_at   | UQCRC2              | UQCRC2: ubiquinol-cytochrome c reductase core protein II                                                                                                                                                |
| 202731_at   | PDCD4               | PDCD4: programmed cell death 4 (neoplastic transformation inhibitor)                                                                                                                                    |
| 210561_s_at | WSB1                | WSB1: WD repeat and SOCS box-containing 1                                                                                                                                                               |
| 222557_at   | STMN3               | STMN3: stathmin-like 3                                                                                                                                                                                  |
| 221087_s_at | APOL3               | APOL3: apolipoprotein L, 3                                                                                                                                                                              |
| 209183_s_at | C10orf10            | C10orf10: chromosome 10 open reading frame 10                                                                                                                                                           |
| 200838_at   | CTSB                | CTSB: cathepsin B                                                                                                                                                                                       |
| 227080_at   | ZNF697              | ZNF697: zinc finger protein 697                                                                                                                                                                         |
| 221808_at   | RAB9A               | RAB9A: RAB9A, member RAS oncogene family                                                                                                                                                                |
| 226433_at   | RNF157              | RNF157: ring finger protein 157                                                                                                                                                                         |
| 202581_at   | HSPA1B              | HSPA1B: heat shock 70kDa protein 1B                                                                                                                                                                     |
| 218241_at   | GOLGA5              | GOLGA5: golgi autoantigen, golgin subfamily a, 5                                                                                                                                                        |
| 204985_s_at | TRAPPC6A            | TRAPPC6A: trafficking protein particle complex 6A                                                                                                                                                       |
| 228763_at   | CHMP4A /// MDP-1    | CHMP4A /// MDP-1: chromatin modifying protein 4A /// magnesium-dependent phosphatase 1                                                                                                                  |
| 226398_s_at | C10orf4             | C10orf4: chromosome 10 open reading frame 4                                                                                                                                                             |
| 222555_s_at | MRPL44              | MRPL44: mitochondrial ribosomal protein L44                                                                                                                                                             |
| 227567_at   | AMZ2                | AMZ2: Archaemetzincins-2                                                                                                                                                                                |
| 203524_s_at | MPST                | MPST: mercaptopyruvate sulfurtransferase                                                                                                                                                                |
| 208074_s_at | AP2S1               | AP2S1: adaptor-related protein complex 2, sigma 1 subunit                                                                                                                                               |
| 209481_at   | SNRK                | SNRK: SNF related kinase                                                                                                                                                                                |
| 207543_s_at | P4HA1               | P4HA1: procollagen-proline, 2-oxoglutarate 4-dioxygenase (proline 4-hydroxylase), alpha polypeptide I                                                                                                   |
| 204972_at   | OAS2                | OAS2: 2'-5'-oligoadenylate synthetase 2, 69/71kDa                                                                                                                                                       |
| 224671_at   | MRPL10              | MRPL10: mitochondrial ribosomal protein L10                                                                                                                                                             |
| 223176_at   | KCTD20              | KCTD20: potassium channel tetramerisation domain containing 20                                                                                                                                          |
| 212974_at   | DENND3              | DENND3: DENN/MADD domain containing 3                                                                                                                                                                   |

Suppl. Table 2: A stroma-induced transcriptional signature associated with adverse clinical outcome in Dex-treated myeloma patients

|             |                    |                                                                                                                                                                           |
|-------------|--------------------|---------------------------------------------------------------------------------------------------------------------------------------------------------------------------|
| 220987_s_at | C11orf17 /// NUAK2 | C11orf17 /// NUAK2: chromosome 11 open reading frame 17 /// chromosome 11 open reading frame 17 /// NUAK family, SNF1-like kinase, 2 /// NUAK family, SNF1-like kinase, 2 |
| 239824_s_at | TMEM107            | TMEM107: transmembrane protein 107                                                                                                                                        |
| 201220_x_at | CTBP2              | CTBP2: C-terminal binding protein 2                                                                                                                                       |
| 201950_x_at | CAPZB              | CAPZB: capping protein (actin filament) muscle Z-line, beta                                                                                                               |
| 209762_x_at | SP110              | SP110: SP110 nuclear body protein                                                                                                                                         |
| 225997_at   | MOBK1A             | MOBK1A: MOB1, Mps One Binder kinase activator-like 1A (yeast)                                                                                                             |
| 224728_at   | ATPAF1             | ATPAF1: ATP synthase mitochondrial F1 complex assembly factor 1                                                                                                           |
| 226665_at   | AHSA2              | AHSA2: AHA1, activator of heat shock 90kDa protein ATPase homolog 2 (yeast)                                                                                               |
| 208626_s_at | VAT1               | VAT1: vesicle amine transport protein 1 homolog (T californica)                                                                                                           |
| 200730_s_at | PTP4A1             | PTP4A1: protein tyrosine phosphatase type IVA, member 1                                                                                                                   |
| 204794_at   | DUSP2              | DUSP2: dual specificity phosphatase 2                                                                                                                                     |
| 201877_s_at | PPP2R5C            | PPP2R5C: protein phosphatase 2, regulatory subunit B (B56), gamma isoform                                                                                                 |
| 215535_s_at | AGPAT1             | AGPAT1: 1-acylglycerol-3-phosphate O-acyltransferase 1 (lysophosphatidic acid acyltransferase, alpha)                                                                     |
| 201234_at   | ILK                | ILK: integrin-linked kinase                                                                                                                                               |
| 202670_at   | MAP2K1             | MAP2K1: mitogen-activated protein kinase kinase 1                                                                                                                         |
| 225613_at   | MAST4              | MAST4: microtubule associated serine/threonine kinase family member 4                                                                                                     |
| 233841_s_at | SUDS3              | SUDS3: suppressor of defective silencing 3 homolog (S. cerevisiae)                                                                                                        |
| 221269_s_at | SH3BGRL3           | SH3BGRL3: SH3 domain binding glutamic acid-rich protein like 3 /// SH3 domain binding glutamic acid-rich protein like 3                                                   |
| 203825_at   | BRD3               | BRD3: bromodomain containing 3                                                                                                                                            |
| 201482_at   | QSOX1              | QSCN6: quiescin Q6                                                                                                                                                        |
| 214129_at   | LOC727942          | PDE4DIP /// LOC642549: phosphodiesterase 4D interacting protein (myomegalin) /// similar to phosphodiesterase 4D interacting protein isoform 2                            |
| 1729_at     | TRADD              | TRADD: TNFRSF1A-associated via death domain                                                                                                                               |
| 202863_at   | SP100              | SP100: SP100 nuclear antigen                                                                                                                                              |
| 225524_at   | ANTXR2             | ANTXR2: anthrax toxin receptor 2                                                                                                                                          |
| 205790_at   | SKAP1              | SCAP1: src family associated phosphoprotein 1                                                                                                                             |
| 202096_s_at | TSPO               | TSPO: translocator protein (18kDa)                                                                                                                                        |
| 209122_at   | ADFP               | ADFP: adipose differentiation-related protein                                                                                                                             |
| 218773_s_at | MSRB2              | MSRB2: methionine sulfoxide reductase B2                                                                                                                                  |
| 221868_at   | PAIP2B             | KIAA1155: KIAA1155 protein                                                                                                                                                |
| 200664_s_at | DNAJB1             | DNAJB1: DnaJ (Hsp40) homolog, subfamily B, member 1                                                                                                                       |
| 210512_s_at | VEGFA              | VEGF: vascular endothelial growth factor                                                                                                                                  |
| 223437_at   | PPARA              | PPARA: peroxisome proliferative activated receptor, alpha                                                                                                                 |
| 221486_at   | ENSA               | ENSA: endosulfine alpha                                                                                                                                                   |
| 202020_s_at | LANCL1             | LANCL1: LanC lantibiotic synthetase component C-like 1 (bacterial)                                                                                                        |
| 211456_x_at | MT1P2              | LOC645745 /// LOC650610: metallothionein 1H-like protein /// hypothetical protein LOC650610                                                                               |
| 225768_at   | NR1D2              | NR1D2: nuclear receptor subfamily 1, group D, member 2                                                                                                                    |
| 204081_at   | NRGN               | NRGN: neurogranin (protein kinase C substrate, RC3)                                                                                                                       |
| 204319_s_at | RGS10              | RGS10: regulator of G-protein signalling 10                                                                                                                               |
| 225892_at   | IREB2              | IREB2: Iron-responsive element binding protein 2                                                                                                                          |
| 203719_at   | ERCC1              | ERCC1: excision repair cross-complementing rodent repair deficiency, complementation group 1 (includes overlapping antisense sequence)                                    |
| 205512_s_at | AIFM1              | PDCD8: programmed cell death 8 (apoptosis-inducing factor)                                                                                                                |
| 212594_at   | PDCD4              | PDCD4: programmed cell death 4 (neoplastic transformation inhibitor)                                                                                                      |
| 231202_at   | ALDH1L2            | ALDH1L2: aldehyde dehydrogenase 1 family, member L2                                                                                                                       |
| 221918_at   | PCK2               | PCK2: PCK2 protein kinase 2                                                                                                                                               |
| 223072_s_at | WBP1               | WBP1: WW domain binding protein 1                                                                                                                                         |
| 202331_at   | BCKDHA             | BCKDHA: Branched chain keto acid dehydrogenase E1, alpha polypeptide                                                                                                      |
| 206918_s_at | CPNE1              | CPNE1: copine 1                                                                                                                                                           |
| 209536_s_at | EHD4               | EHD4: EH-domain containing 4                                                                                                                                              |
| 204745_x_at | MT1G               | MT1G: metallothionein 1G                                                                                                                                                  |
| 209339_at   | SIAH2              | SIAH2: seven in absentia homolog 2 (Drosophila) /// seven in absentia homolog 2 (Drosophila)                                                                              |
| 209004_s_at | FBXL5              | FBXL5: F-box and leucine-rich repeat protein 5                                                                                                                            |
| 211926_s_at | MYH9               | MYH9: myosin, heavy polypeptide 9, non-muscle                                                                                                                             |
| 230027_s_at | MRPL43             | MRPL43: mitochondrial ribosomal protein L43                                                                                                                               |

Suppl. Table 2: A stroma-induced transcriptional signature associated with adverse clinical outcome in Dex-treated myeloma patients

|             |                          |                                                                                                                                                     |
|-------------|--------------------------|-----------------------------------------------------------------------------------------------------------------------------------------------------|
| 203905_at   | PARN                     | PARN: poly(A)-specific ribonuclease (deadenylation nuclease)                                                                                        |
| 210045_at   | IDH2                     | IDH2: isocitrate dehydrogenase 2 (NADP+), mitochondrial                                                                                             |
| 224807_at   | GRAMD1A                  | GRAMD1A: GRAM domain containing 1A                                                                                                                  |
| 203349_s_at | ETV5                     | ETV5: ets variant gene 5 (ets-related molecule)                                                                                                     |
| 202564_x_at | ARL2                     | ARL2: ADP-ribosylation factor-like 2                                                                                                                |
| 212509_s_at | MXRA7                    | MXRA7: matrix-remodelling associated 7                                                                                                              |
| 201781_s_at | AIP                      | AIP: aryl hydrocarbon receptor interacting protein                                                                                                  |
| 223479_s_at | CHCHD5                   | CHCHD5: coiled-coil-helix-coiled-coil-helix domain containing 5                                                                                     |
| 210052_s_at | TPX2                     | TPX2: TPX2, microtubule-associated, homolog ( <i>Xenopus laevis</i> )                                                                               |
| 223196_s_at | SESN2                    | SESN2: sestrin 2                                                                                                                                    |
| 217764_s_at | RAB31                    | RAB31: RAB31, member RAS oncogene family                                                                                                            |
| 227058_at   | C13orf33                 | C13orf33: chromosome 13 open reading frame 33                                                                                                       |
| 206200_s_at | ANXA11                   | ANXA11: annexin A11                                                                                                                                 |
| 229739_s_at | FAM116B                  | FAM116B: family with sequence similarity 116, member B                                                                                              |
| 204961_s_at | NCF1 /// NCF1B /// NCF1C | NCF1 /// LOC653361 /// LOC653840: neutrophil cytosolic factor 1, (chronic granulomatous disease, autosomal 1)                                       |
| 240991_at   | ---                      | NDRG1: N-myc downstream regulated gene 1                                                                                                            |
| 202729_s_at | LTBP1                    | LTBP1: latent transforming growth factor beta binding protein 1                                                                                     |
| 202003_s_at | ACAA2                    | ACAA2: acetyl-Coenzyme A acyltransferase 2 (mitochondrial 3-oxoacyl-Coenzyme A thiolase)                                                            |
| 200878_at   | EPAS1                    | EPAS1: endothelial PAS domain protein 1                                                                                                             |
| 203907_s_at | IQSEC1                   | IQSEC1: IQ motif and Sec7 domain 1                                                                                                                  |
| 226715_at   | FOXP1                    | FOXP1: forkhead box K1                                                                                                                              |
| 204621_s_at | NR4A2                    | NR4A2: nuclear receptor subfamily 4, group A, member 2                                                                                              |
| 203674_at   | HELZ                     | HELZ: helicase with zinc finger                                                                                                                     |
| 226637_at   | UBE2H                    | UBE2H: Ubiquitin-conjugating enzyme E2H (UBC8 homolog, yeast)                                                                                       |
| 226381_at   | PS1TP4                   | PS1TP4: HBV preS1-transactivated protein 4                                                                                                          |
| 226517_at   | BCAT1                    | BCAT1: branched chain aminotransferase 1, cytosolic                                                                                                 |
| 202060_at   | CTR9                     | CTR9: Ctr9, Paf1/RNA polymerase II complex component, homolog ( <i>S. cerevisiae</i> )                                                              |
| 209539_at   | ARHGEF6                  | ARHGEF6: Rac/Cdc42 guanine nucleotide exchange factor (GEF) 6                                                                                       |
| 203232_s_at | ATXN1                    | ATXN1: ataxin 1                                                                                                                                     |
| 235518_at   | SLC8A1                   | SLC8A1: solute carrier family 8 (sodium/calcium exchanger), member 1                                                                                |
| 213198_at   | ACVR1B                   | ACVR1B: activin A receptor, type IB                                                                                                                 |
| 208893_s_at | DUSP6                    | DUSP6: dual specificity phosphatase 6                                                                                                               |
| 201570_at   | SAMM50                   | SAMM50: sorting and assembly machinery component 50 homolog ( <i>S. cerevisiae</i> )                                                                |
| 203885_at   | RAB21                    | RAB21: RAB21, member RAS oncogene family                                                                                                            |
| 204070_at   | RARRES3                  | RARRES3: retinoic acid receptor responder (tazarotene induced) 3                                                                                    |
| 209191_at   | TUBB6                    | TUBB6: tubulin, beta 6                                                                                                                              |
| 215088_s_at | SDHC                     | SDHC: succinate dehydrogenase complex, subunit C, integral membrane protein, 15kDa                                                                  |
| 225689_at   | C3orf39                  | C3orf39: chromosome 3 open reading frame 39                                                                                                         |
| 208890_s_at | PLXNB2                   | PLXNB2: plexin B2                                                                                                                                   |
| 225224_at   | C20orf112                | C20orf112: chromosome 20 open reading frame 112                                                                                                     |
| 212689_s_at | JMJD1A                   | JMJD1A: jumonji domain containing 1A                                                                                                                |
| 224535_s_at | MRP63                    | MRP63: mitochondrial ribosomal protein 63 /// mitochondrial ribosomal protein 63                                                                    |
| 202658_at   | PEX11B                   | PEX11B: peroxisomal biogenesis factor 11B                                                                                                           |
| 226275_at   | MXD1                     | MXD1: MAX dimerization protein 1                                                                                                                    |
| 204173_at   | MYL6B                    | MYL6B: myosin, light polypeptide 6B, alkali, smooth muscle and non-muscle                                                                           |
| 203568_s_at | TRIM38                   | TRIM38: tripartite motif-containing 38                                                                                                              |
| 203311_s_at | ARF6                     | ARF6: ADP-ribosylation factor 6                                                                                                                     |
| 200765_x_at | CTNNA1                   | CTNNA1: catenin (cadherin-associated protein), alpha 1, 102kDa                                                                                      |
| 227864_s_at | FAM125A                  | FAM125A: family with sequence similarity 125, member A                                                                                              |
| 230090_at   | ---                      | LOC646739: hypothetical protein LOC646739                                                                                                           |
| 209194_at   | CETN2                    | CETN2: centrin, EF-hand protein, 2                                                                                                                  |
| 202446_s_at | PLSCR1                   | PLSCR1: phospholipid scramblase 1                                                                                                                   |
| 201921_at   | GNG10 /// LOC55289       | GNG10 /// LOC552891 /// LOC653503: guanine nucleotide binding protein (G protein), gamma 10 /// hypothetical protein LOC552891 /// GNG10 pseudogene |
| 212818_s_at | ASB1                     | ASB1: ankyrin repeat and SOCS box-containing 1                                                                                                      |
| 207983_s_at | STAG2                    | STAG2: stromal antigen 2                                                                                                                            |
| 203720_s_at | ERCC1                    | ERCC1: excision repair cross-complementing rodent repair deficiency, complementation group 1 (includes overlapping antisense sequence)              |



Suppl. Table 2: A stroma-induced transcriptional signature associated with adverse clinical outcome in Dex-treated myeloma patients

|             |           |                                                                                                                                                                                                     |
|-------------|-----------|-----------------------------------------------------------------------------------------------------------------------------------------------------------------------------------------------------|
| 232762_at   | KIAA1217  | KIAA1217: KIAA1217                                                                                                                                                                                  |
| 209447_at   | SYNE1     | SYNE1: spectrin repeat containing, nuclear envelope 1                                                                                                                                               |
| 220330_s_at | SAMSN1    | SAMSN1: SAM domain, SH3 domain and nuclear localisation signals, 1                                                                                                                                  |
| 202122_s_at | M6PRBP1   | M6PRBP1: mannose-6-phosphate receptor binding protein 1                                                                                                                                             |
| 203476_at   | TPBG      | TPBG: trophoblast glycoprotein                                                                                                                                                                      |
| 225611_at   | MAST4     | gb:AI922968 /DB_XREF=gi:5659018 /DB_XREF=wn66h03.x1 /CLONE=IMAGE:2450453 /FEA=EST /CNT=76 /TID=Hs.110341.0 /TIER=Stack /STK=10 /UG=Hs.110341 /UG_TITLE=ESTs, Weakly similar to unknown (M.musculus) |
| 223276_at   | MST150    | MST150: MSTP150                                                                                                                                                                                     |
| 201365_at   | OAZ2      | OAZ2: ornithine decarboxylase antizyme 2                                                                                                                                                            |
| 230212_at   | LOC729345 | gb:AW027076 /DB_XREF=gi:5885832 /DB_XREF=wt71g11.x1 /CLONE=IMAGE:2512964 /FEA=EST /CNT=9 /TID=Hs.189114.0 /TIER=Stack /STK=8 /UG=Hs.189114 /UG_TITLE=ESTs                                           |
| 226989_at   | RGMB      | RGMB: RGM domain family, member B                                                                                                                                                                   |
| 225855_at   | EPB41L5   | EPB41L5: erythrocyte membrane protein band 4.1 like 5                                                                                                                                               |
| 204034_at   | ETHE1     | ETHE1: ethylmalonic encephalopathy 1                                                                                                                                                                |
| 226697_at   | FAM114A1  | LOC92689: hypothetical protein BC001096                                                                                                                                                             |
| 215714_s_at | SMARCA4   | SMARCA4: SWI/SNF related, matrix associated, actin dependent regulator of chromatin, subfamily a, member 4                                                                                          |
| 205207_at   | IL6       | IL6: interleukin 6 (interferon, beta 2)                                                                                                                                                             |
| 231769_at   | FBXO6     | FBXO6: F-box protein 6                                                                                                                                                                              |
| 235696_at   | ---       | CDNA clone IMAGE:4837650                                                                                                                                                                            |
| 224819_at   | TCEAL8    | TCEAL8: transcription elongation factor A (SII)-like 8                                                                                                                                              |
| 206118_at   | STAT4     | STAT4: signal transducer and activator of transcription 4                                                                                                                                           |
| 203912_s_at | DNASE1L1  | DNASE1L1: deoxyribonuclease I-like 1                                                                                                                                                                |
| 226301_at   | C6orf192  | C6orf192: chromosome 6 open reading frame 192                                                                                                                                                       |
| 226562_at   | ZSCAN29   | ZNF690: zinc finger protein 690                                                                                                                                                                     |
| 200931_s_at | VCL       | VCL: vinculin                                                                                                                                                                                       |
| 202758_s_at | RFXANK    | RFXANK: regulatory factor X-associated ankyrin-containing protein                                                                                                                                   |
| 205902_at   | KCNN3     | KCNN3: potassium intermediate/small conductance calcium-activated channel, subfamily N, member 3                                                                                                    |
| 217990_at   | GMPR2     | GMPR2: guanosine monophosphate reductase 2                                                                                                                                                          |
| 228499_at   | PFKFB4    | PFKFB4: 6-phosphofructo-2-kinase/fructose-2,6-biphosphatase 4                                                                                                                                       |
| 227961_at   | CTSB      | CTSB: cathepsin B                                                                                                                                                                                   |
| 209662_at   | CETN3     | CETN3: centrin, EF-hand protein, 3 (CDC31 homolog, yeast)                                                                                                                                           |
| 219175_s_at | SLC41A3   | SLC41A3: solute carrier family 41, member 3                                                                                                                                                         |
| 209984_at   | JMJD2C    | JMJD2C: jumonji domain containing 2C                                                                                                                                                                |
| 229771_at   | TMEM41A   | TMEM41A: Transmembrane protein 41A                                                                                                                                                                  |
| 202030_at   | BCKDK     | BCKDK: branched chain ketoacid dehydrogenase kinase                                                                                                                                                 |
| 214736_s_at | ADD1      | ADD1: adducin 1 (alpha)                                                                                                                                                                             |
| 214449_s_at | RHOQ      | RHOQ: ras homolog gene family, member Q                                                                                                                                                             |
| 205042_at   | GNE       | GNE: glucosamine (UDP-N-acetyl)-2-epimerase/N-acetylmannosamine kinase                                                                                                                              |
| 202733_at   | P4HA2     | P4HA2: procollagen-proline, 2-oxoglutarate 4-dioxygenase (proline 4-hydroxylase), alpha polypeptide II                                                                                              |
| 229828_at   | ---       | gb:AL044007 /DB_XREF=gi:5432235 /DB_XREF=DKFZp434I2028_s1 /CLONE=DKFZp434I2028 /FEA=EST /CNT=13 /TID=Hs.95663.0 /TIER=Stack /STK=10 /UG=Hs.95663 /UG_TITLE=ESTs                                     |
| 200675_at   | CD81      | CD81: CD81 molecule                                                                                                                                                                                 |
| 208854_s_at | STK24     | STK24: serine/threonine kinase 24 (STE20 homolog, yeast)                                                                                                                                            |
| 228728_at   | C7orf58   | FLJ21986: hypothetical protein FLJ21986                                                                                                                                                             |
| 225872_at   | SLC35F5   | SLC35F5: solute carrier family 35, member F5                                                                                                                                                        |
| 226855_at   | ---       | PDP2: Pyruvate dehydrogenase phosphatase isoenzyme 2                                                                                                                                                |
| 202777_at   | SHOC2     | SHOC2: soc-2 suppressor of clear homolog (C. elegans)                                                                                                                                               |
| 227182_at   | SUSD3     | SUSD3: sushi domain containing 3                                                                                                                                                                    |
| 200665_s_at | SPARC     | SPARC: secreted protein, acidic, cysteine-rich (osteonectin) /// secreted protein, acidic, cysteine-rich (osteonectin)                                                                              |
| 212051_at   | WIPF2     | WIRE: WIRE protein                                                                                                                                                                                  |
| 225604_s_at | C9orf19   | C9orf19: chromosome 9 open reading frame 19                                                                                                                                                         |
| 202934_at   | HK2       | HK2: hexokinase 2                                                                                                                                                                                   |
| 201416_at   | SOX4      | SOX4: SRY (sex determining region Y)-box 4                                                                                                                                                          |
| 224790_at   | DDEF1     | DDEF1: development and differentiation enhancing factor 1                                                                                                                                           |
| 221998_s_at | VRK3      | VRK3: vaccinia related kinase 3                                                                                                                                                                     |

Suppl. Table 2: A stroma-induced transcriptional signature associated with adverse clinical outcome in Dex-treated myeloma patients

|             |           |                                                                                                                                                                                                                        |
|-------------|-----------|------------------------------------------------------------------------------------------------------------------------------------------------------------------------------------------------------------------------|
| 230619_at   | ARNT      | ARNT: aryl hydrocarbon receptor nuclear translocator                                                                                                                                                                   |
| 210479_s_at | RORA      | RORA: RAR-related orphan receptor A                                                                                                                                                                                    |
| 223395_at   | ABI3BP    | ABI3BP: ABI gene family, member 3 (NESH) binding protein                                                                                                                                                               |
| 213455_at   | FAM114A1  | LOC92689: hypothetical protein BC001096                                                                                                                                                                                |
| 231956_at   | KIAA1618  | KIAA1618: KIAA1618                                                                                                                                                                                                     |
| 226568_at   | FAM102B   | FAM102B: family with sequence similarity 102, member B                                                                                                                                                                 |
| 224823_at   | MYLK      | MYLK: myosin, light polypeptide kinase                                                                                                                                                                                 |
| 239045_at   | ---       | ERN1: Endoplasmic reticulum to nucleus signalling 1                                                                                                                                                                    |
| 212544_at   | ZNHIT3    | ZNHIT3: zinc finger, HIT type 3                                                                                                                                                                                        |
| 202623_at   | EAPP      | C14orf11: chromosome 14 open reading frame 11                                                                                                                                                                          |
| 212547_at   | FLJ35348  | FLJ35348: FLJ35348                                                                                                                                                                                                     |
| 208631_s_at | HADHA     | HADHA: hydroxyacyl-Coenzyme A dehydrogenase/3-ketoacyl-Coenzyme A thiolase/enoyl-Coenzyme A hydratase (trifunctional protein), alpha subunit                                                                           |
| 217909_s_at | MLX       | MLX: MAX-like protein X                                                                                                                                                                                                |
| 221731_x_at | VCAN      | CSPG2: chondroitin sulfate proteoglycan 2 (versican)                                                                                                                                                                   |
| 227123_at   | RAB3B     | RAB3B: RAB3B, member RAS oncogene family                                                                                                                                                                               |
| 226038_at   | LONRF1    | LONRF1: LON peptidase N-terminal domain and ring finger 1                                                                                                                                                              |
| 209137_s_at | USP10     | USP10: ubiquitin specific peptidase 10                                                                                                                                                                                 |
| 225710_at   | GNB4      | CDNA FLJ34013 fis, clone FCBBF2002111                                                                                                                                                                                  |
| 227941_at   | LOC339803 | LOC339803: hypothetical protein LOC339803                                                                                                                                                                              |
| 224710_at   | RAB34     | RAB34: RAB34, member RAS oncogene family                                                                                                                                                                               |
| 244025_at   | ---       | gb:BF590917 /DB_XREF=gi:11683241 /DB_XREF=7h46a08.x1 /CLONE=IMAGE:3318998 /FEA=EST /CNT=6 /TID=Hs.224432.0 /TIER=ConsEnd /STK=3 /UG=Hs.224432 /UG_TITLE=ESTs                                                           |
| 202224_at   | CRK       | CRK: v-crk sarcoma virus CT10 oncogene homolog (avian)                                                                                                                                                                 |
| 211318_s_at | RAE1      | RAE1: RAE1 RNA export 1 homolog (S. pombe)                                                                                                                                                                             |
| 242866_x_at | ---       | POU2F2: POU domain, class 2, transcription factor 2                                                                                                                                                                    |
| 218286_s_at | RNF7      | RNF7: ring finger protein 7                                                                                                                                                                                            |
| 210543_s_at | PRKDC     | PRKDC: protein kinase, DNA-activated, catalytic polypeptide                                                                                                                                                            |
| 224657_at   | ERRF1     | ERRF1: ERBB receptor feedback inhibitor 1                                                                                                                                                                              |
| 223614_at   | C8orf57   | C8orf57: chromosome 8 open reading frame 57                                                                                                                                                                            |
| 214437_s_at | SHMT2     | SHMT2: serine hydroxymethyltransferase 2 (mitochondrial)                                                                                                                                                               |
| 202942_at   | ETFB      | ETFB: electron-transfer-flavoprotein, beta polypeptide                                                                                                                                                                 |
| 223263_s_at | FGFR1OP2  | FGFR1OP2: FGFR1 oncogene partner 2                                                                                                                                                                                     |
| 200604_s_at | PRKAR1A   | PRKAR1A: protein kinase, cAMP-dependent, regulatory, type I, alpha (tissue specific extinguisher 1)                                                                                                                    |
| 235256_s_at | GALM      | GALM: galactose mutarotase (aldose 1-epimerase)                                                                                                                                                                        |
| 232616_at   | LOC199725 | LOC199725: hypothetical protein LOC199725                                                                                                                                                                              |
| 212484_at   | FAM89B    | FAM89B: family with sequence similarity 89, member B                                                                                                                                                                   |
| 217975_at   | WBP5      | WBP5: WW domain binding protein 5                                                                                                                                                                                      |
| 204748_at   | PTGS2     | PTGS2: prostaglandin-endoperoxide synthase 2 (prostaglandin G/H synthase and cyclooxygenase)                                                                                                                           |
| 223382_s_at | ZNRF1     | ZNRF1: zinc and ring finger 1                                                                                                                                                                                          |
| 212206_s_at | H2AFV     | H2AFV: H2A histone family, member V                                                                                                                                                                                    |
| 225378_at   | VPS37A    | VPS37A: vacuolar protein sorting 37 homolog A (S. cerevisiae)                                                                                                                                                          |
| 208581_x_at | MT1X      | MT1X: metallothionein 1X                                                                                                                                                                                               |
| 223625_at   | FAM126A   | DRCTNNB1A: down-regulated by Ctnnb1, a                                                                                                                                                                                 |
| 225228_at   | TMEM77    | TMEM77: transmembrane protein 77                                                                                                                                                                                       |
| 214439_x_at | BIN1      | BIN1: bridging integrator 1                                                                                                                                                                                            |
| 212632_at   | STX7      | STX7: Syntaxin 7                                                                                                                                                                                                       |
| 227955_s_at | ---       | CDNA: FLJ22256 fis, clone HRC02860                                                                                                                                                                                     |
| 208029_s_at | LAPTM4B   | LAPTM4B: lysosomal associated protein transmembrane 4 beta /// lysosomal associated protein transmembrane 4 beta                                                                                                       |
| 203091_at   | FUBP1     | FUBP1: far upstream element (FUSE) binding protein 1                                                                                                                                                                   |
| 218300_at   | C16orf53  | C16orf53: chromosome 16 open reading frame 53                                                                                                                                                                          |
| 210524_x_at | ---       | gb:AF078844.1 /DB_XREF=gi:6683748 /FEA=FLmRNA /CNT=6 /TID=Hs.8765.1 /TIER=FL /STK=0 /UG=Hs.8765 /LL=11325 /UG_GENE=RNAHP /DEF=Homo sapiens hqp0376 protein mRNA, complete cds. /PROD=hqp0376 protein /FL=gb:AF078844.1 |
| 202123_s_at | ABL1      | ABL1: v-abl Abelson murine leukemia viral oncogene homolog 1                                                                                                                                                           |
| 200764_s_at | CTNNA1    | CTNNA1: catenin (cadherin-associated protein), alpha 1, 102kDa                                                                                                                                                         |
| 229628_s_at | KIAA1529  | KIAA1529: KIAA1529                                                                                                                                                                                                     |

Suppl. Table 2: A stroma-induced transcriptional signature associated with adverse clinical outcome in Dex-treated myeloma patients

|             |                     |                                                                                                                                                                                                                                           |
|-------------|---------------------|-------------------------------------------------------------------------------------------------------------------------------------------------------------------------------------------------------------------------------------------|
| 226978_at   | PPARA               | PPARA: peroxisome proliferative activated receptor, alpha                                                                                                                                                                                 |
| 212136_at   | ATP2B4              | ATP2B4: ATPase, Ca <sup>++</sup> transporting, plasma membrane 4                                                                                                                                                                          |
| 228832_at   | FLJ20021            | FLJ20021: hypothetical LOC90024                                                                                                                                                                                                           |
| 200615_s_at | AP2B1               | AP2B1: adaptor-related protein complex 2, beta 1 subunit                                                                                                                                                                                  |
| 210986_s_at | TPM1                | TPM1: tropomyosin 1 (alpha)                                                                                                                                                                                                               |
| 212573_at   | ENDOD1              | ENDOD1: endonuclease domain containing 1                                                                                                                                                                                                  |
| 223443_s_at | FLJ32065            | FLJ32065: hypothetical protein FLJ32065                                                                                                                                                                                                   |
| 228189_at   | BAG4                | BAG4: BCL2-associated athanogene 4                                                                                                                                                                                                        |
| 236126_at   | ACVR2B              | Transcribed locus                                                                                                                                                                                                                         |
| 216705_s_at | ADA                 | ADA: adenosine deaminase                                                                                                                                                                                                                  |
| 210296_s_at | PXMP3               | PXMP3: peroxisomal membrane protein 3, 35kDa (Zellweger syndrome)                                                                                                                                                                         |
| 238996_x_at | ALDOA               | ALDOA: aldolase A, fructose-bisphosphate                                                                                                                                                                                                  |
| 217691_x_at | SLC16A3             | SLC16A3: solute carrier family 16, member 3 (monocarboxylic acid transporter 4)                                                                                                                                                           |
| 228670_at   | TEP1                | TEP1: telomerase-associated protein 1                                                                                                                                                                                                     |
| 210554_s_at | CTBP2               | CTBP2: C-terminal binding protein 2                                                                                                                                                                                                       |
| 213629_x_at | MT1F                | MT1F: metallothionein 1F (functional)                                                                                                                                                                                                     |
| 36711_at    | MAFF                | MAFF: v-maf musculoaponeurotic fibrosarcoma oncogene homolog F (avian)                                                                                                                                                                    |
| 213357_at   | GTF2H5              | GTF2H5: general transcription factor IIH, polypeptide 5                                                                                                                                                                                   |
| 219878_s_at | KLF13               | KLF13: Kruppel-like factor 13                                                                                                                                                                                                             |
| 202615_at   | GNAQ                | GNAQ: Guanine nucleotide binding protein (G protein), q polypeptide                                                                                                                                                                       |
| 209541_at   | IGF1                | IGF1: insulin-like growth factor 1 (somatomedin C)                                                                                                                                                                                        |
| 232902_s_at | RARS2               | RARS2: arginyl-tRNA synthetase-like                                                                                                                                                                                                       |
| 227728_at   | ---                 | CDNA FLJ42306 fis, clone TRACH2001646                                                                                                                                                                                                     |
| 225955_at   | LOC653506 /// METRN | MED25 /// METRN /// LOC653506: mediator of RNA polymerase II transcription, subunit 25 homolog (S. cerevisiae) /// meteorin, glial cell differentiation regulator-like /// similar to meteorin, glial cell differentiation regulator-like |
| 239317_at   | CEACAM21            | gb:BG484601 /DB_XREF=gi:13416880 /DB_XREF=602505772F1 /CLONE=IMAGE:4619369 /FEA=EST /CNT=8 /TID=Hs.282899.0 /TIER=ConsEnd /STK=0 /UG=Hs.282899 /UG_TITLE=ESTS                                                                             |
| 228452_at   | C17orf39            | C17orf39: chromosome 17 open reading frame 39                                                                                                                                                                                             |
| 212875_s_at | C2CD2               | C21orf25: chromosome 21 open reading frame 25                                                                                                                                                                                             |
| 228297_at   | CNN3                | CNN3: Calponin 3, acidic                                                                                                                                                                                                                  |
| 224476_s_at | MESP1               | MESP1: mesoderm posterior 1 homolog (mouse) /// mesoderm posterior 1 homolog (mouse)                                                                                                                                                      |
| 203277_at   | DFFA                | DFFA: DNA fragmentation factor, 45kDa, alpha polypeptide                                                                                                                                                                                  |
| 218260_at   | DDA1                | C19orf58: chromosome 19 open reading frame 58                                                                                                                                                                                             |
| 202129_s_at | RIOK3               | RIOK3: RIO kinase 3 (yeast) /// RIO kinase 3 (yeast)                                                                                                                                                                                      |
| 91703_at    | EHBP1L1             | MGC15523 /// EHBP1L1: hypothetical protein MGC15523 /// EH domain binding protein 1-like 1                                                                                                                                                |
| 203338_at   | PPP2R5E             | PPP2R5E: protein phosphatase 2, regulatory subunit B (B56), epsilon isoform                                                                                                                                                               |
| 232095_at   | SRGAP2P1            | SRGAP2: SLIT-ROBO Rho GTPase activating protein 2                                                                                                                                                                                         |
| 227089_at   | HBP1                | Transcribed locus                                                                                                                                                                                                                         |
| 218976_at   | DNAJC12             | DNAJC12: DnaJ (Hsp40) homolog, subfamily C, member 12                                                                                                                                                                                     |
| 216733_s_at | GATM                | GATM: glycine amidinotransferase (L-arginine:glycine amidinotransferase)                                                                                                                                                                  |
| 203814_s_at | NQO2                | NQO2: NAD(P)H dehydrogenase, quinone 2                                                                                                                                                                                                    |
| 231772_x_at | CENPH               | CENPH: centromere protein H                                                                                                                                                                                                               |
| 201417_at   | SOX4                | SOX4: SRY (sex determining region Y)-box 4                                                                                                                                                                                                |
| 202371_at   | TCEAL4              | TCEAL4: transcription elongation factor A (SII)-like 4                                                                                                                                                                                    |
| 220052_s_at | TINF2               | TINF2: TERF1 (TRF1)-interacting nuclear factor 2                                                                                                                                                                                          |
| 226621_at   | ---                 | gb:A1133452 /DB_XREF=gi:6360768 /DB_XREF=HA2061 /FEA=EST /CNT=48 /TID=Hs.75431.3 /TIER=Stack /STK=29 /UG=Hs.75431 /LL=2266 /UG_GENE=FGG /UG_TITLE=fibrinogen, gamma polypeptide                                                           |
| 204194_at   | BACH1               | BACH1: BTB and CNC homology 1, basic leucine zipper transcription factor 1                                                                                                                                                                |
| 201624_at   | DARS                | DARS: aspartyl-tRNA synthetase                                                                                                                                                                                                            |
| 210426_x_at | RORA                | RORA: RAR-related orphan receptor A                                                                                                                                                                                                       |
| 202501_at   | MAPRE2              | MAPRE2: microtubule-associated protein, RP/EB family, member 2                                                                                                                                                                            |
| 229553_at   | PGM2L1              | PGM2L1: phosphoglucomutase 2-like 1                                                                                                                                                                                                       |
| 225930_at   | NKIRAS1             | NKIRAS1: NFkB inhibitor interacting Ras-like 1                                                                                                                                                                                            |
| 222572_at   | PPM2C               | PPM2C: protein phosphatase 2C, magnesium-dependent, catalytic subunit                                                                                                                                                                     |
| 223221_at   | SCO1                | SCO1: SCO cytochrome oxidase deficient homolog 1 (yeast)                                                                                                                                                                                  |
| 231166_at   | GPR155              | GPR155: G protein-coupled receptor 155                                                                                                                                                                                                    |

Suppl. Table 2: A stroma-induced transcriptional signature associated with adverse clinical outcome in Dex-treated myeloma patients

|             |           |                                                                                                                                                             |
|-------------|-----------|-------------------------------------------------------------------------------------------------------------------------------------------------------------|
| 216602_s_at | FARSA     | FARSLA: phenylalanine-tRNA synthetase-like, alpha subunit                                                                                                   |
| 227792_at   | LOC162073 | LOC162073: Hypothetical protein LOC162073                                                                                                                   |
| 218149_s_at | ZNF395    | ZNF395: zinc finger protein 395                                                                                                                             |
| 204384_at   | GOLGA2    | GOLGA2: golgi autoantigen, golgin subfamily a, 2                                                                                                            |
| 201881_s_at | ARIH1     | ARIH1: ariadne homolog, ubiquitin-conjugating enzyme E2 binding protein, 1 (Drosophila)                                                                     |
| 202978_s_at | CREBZF    | ZF: HCF-binding transcription factor Zhangfei                                                                                                               |
| 241367_at   | FLJ35767  | FLJ35767: FLJ35767 protein                                                                                                                                  |
| 225812_at   | LOC619208 | LOC619208: hypothetical protein LOC619208                                                                                                                   |
| 223392_s_at | TSHZ3     | TSHZ3: teashirt family zinc finger 3                                                                                                                        |
| 212495_at   | JMJD2B    | JMJD2B: jumonji domain containing 2B                                                                                                                        |
| 212472_at   | MICAL2    | MICAL2: microtubule associated monooxygenase, calponin and LIM domain containing 2                                                                          |
| 227452_at   | ---       | LOC146795: Hypothetical protein LOC146795                                                                                                                   |
| 206075_s_at | CSNK2A1   | CSNK2A1: casein kinase 2, alpha 1 polypeptide                                                                                                               |
| 217875_s_at | TMEPAI    | TMEPAI: transmembrane, prostate androgen induced RNA                                                                                                        |
| 221755_at   | EHBP1L1   | EHBP1L1: EH domain binding protein 1-like 1                                                                                                                 |
| 227718_at   | PURB      | PURB: purine-rich element binding protein B                                                                                                                 |
| 228678_at   | FAM116B   | CYP2U1 /// FAM116B: cytochrome P450, family 2, subfamily U, polypeptide 1 /// family with sequence similarity 116, member B                                 |
| 225766_s_at | TNPO1     | TNPO1: Transportin 1                                                                                                                                        |
| 212315_s_at | NUP210    | NUP210: nucleoporin 210kDa                                                                                                                                  |
| 231227_at   | ---       | Transcribed locus, strongly similar to NP_003383.2 wingless-type MMTV integration site family, member 5A precursor; WNT-5A protein precursor [Homo sapiens] |
| 225446_at   | BRWD1     | BRWD1: bromodomain and WD repeat domain containing 1                                                                                                        |
| 201971_s_at | ATP6V1A   | ATP6V1A: ATPase, H+ transporting, lysosomal 70kDa, V1 subunit A                                                                                             |
| 217952_x_at | PHF3      | PHF3: PHD finger protein 3                                                                                                                                  |
| 221986_s_at | KLHL24    | KLHL24: kelch-like 24 (Drosophila)                                                                                                                          |
| 50374_at    | C17orf90  | LOC339229: hypothetical protein LOC339229                                                                                                                   |
| 202587_s_at | AK1       | AK1: adenylate kinase 1                                                                                                                                     |
| 228280_at   | ZC3HAV1L  | ZC3HAV1L: zinc finger CCCH-type, antiviral 1-like                                                                                                           |
| 203823_at   | RGS3      | RGS3: regulator of G-protein signalling 3                                                                                                                   |
| 221666_s_at | PYCARD    | PYCARD: PYD and CARD domain containing                                                                                                                      |
| 224911_s_at | DCBLD2    | DCBLD2: discoidin, CUB and LCCL domain containing 2                                                                                                         |
| 221778_at   | JHDM1D    | KIAA1718: KIAA1718 protein                                                                                                                                  |
| 225436_at   | FAM108C1  | LOC58489: hypothetical protein from EUROIMAGE 588495                                                                                                        |
| 218487_at   | ALAD      | ALAD: aminolevulinatase, delta-, dehydratase                                                                                                                |
| 214835_s_at | SUCLG2    | SUCLG2: succinate-CoA ligase, GDP-forming, beta subunit                                                                                                     |
| 210105_s_at | FYN       | FYN: FYN oncogene related to SRC, FGR, YES                                                                                                                  |
| 232145_at   | LOC388969 | LOC388969: hypothetical LOC388969                                                                                                                           |
| 204114_at   | NID2      | NID2: nidogen 2 (osteonidogen)                                                                                                                              |
| 217782_s_at | GPS1      | GPS1: G protein pathway suppressor 1                                                                                                                        |
| 212293_at   | HIPK1     | HIPK1: homeodomain interacting protein kinase 1                                                                                                             |
| 212246_at   | MCFD2     | MCFD2: multiple coagulation factor deficiency 2                                                                                                             |
| 202996_at   | POLD4     | POLD4: polymerase (DNA-directed), delta 4                                                                                                                   |
| 202100_at   | RALB      | RALB: v-ral simian leukemia viral oncogene homolog B (ras related; GTP binding protein)                                                                     |
| 204115_at   | GNG11     | GNG11: guanine nucleotide binding protein (G protein), gamma 11                                                                                             |
| 212418_at   | ELF1      | ELF1: E74-like factor 1 (ets domain transcription factor)                                                                                                   |
| 201132_at   | HNRPH2    | HNRPH2: heterogeneous nuclear ribonucleoprotein H2 (H')                                                                                                     |
| 221498_at   | SNX27     | SNX27: sorting nexin family member 27                                                                                                                       |
| 212646_at   | RFTN1     | RAFTLIN: raft-linking protein                                                                                                                               |
| 219336_s_at | ASCC1     | ASCC1: activating signal cointegrator 1 complex subunit 1                                                                                                   |
| 204479_at   | OSTF1     | OSTF1: osteoclast stimulating factor 1                                                                                                                      |
| 210387_at   | HIST1H2BG | HIST1H2BG: histone 1, H2bg                                                                                                                                  |
| 211543_s_at | GRK6      | GRK6: G protein-coupled receptor kinase 6                                                                                                                   |
| 202386_s_at | KIAA0430  | KIAA0430: KIAA0430                                                                                                                                          |
| 225189_s_at | RAPH1     | RAPH1: Ras association (RalGDS/AF-6) and pleckstrin homology domains 1                                                                                      |
| 244509_at   | GPR155    | GPR155: G protein-coupled receptor 155                                                                                                                      |
| 201170_s_at | BHLHB2    | BHLHB2: basic helix-loop-helix domain containing, class B, 2                                                                                                |
| 227868_at   | LOC154761 | LOC154761: hypothetical protein LOC154761                                                                                                                   |
| 200885_at   | RHOC      | RHOC: ras homolog gene family, member C                                                                                                                     |
| 224968_at   | CCDC104   | CCDC104: coiled-coil domain containing 104                                                                                                                  |

Suppl. Table 2: A stroma-induced transcriptional signature associated with adverse clinical outcome in Dex-treated myeloma patients

|             |           |                                                                                                   |
|-------------|-----------|---------------------------------------------------------------------------------------------------|
| 218507_at   | HIG2      | HIG2: hypoxia-inducible protein 2                                                                 |
| 204326_x_at | MT1X      | MT1X: metallothionein 1X                                                                          |
| 217925_s_at | C6orf106  | C6orf106: chromosome 6 open reading frame 106                                                     |
| 200991_s_at | SNX17     | SNX17: sorting nexin 17                                                                           |
| 208782_at   | FSTL1     | FSTL1: follistatin-like 1                                                                         |
| 216336_x_at | MT1M      | MT1M: metallothionein 1M                                                                          |
| 212859_x_at | MT1E      | MT1E: metallothionein 1E (functional)                                                             |
| 202667_s_at | SLC39A7   | SLC39A7: solute carrier family 39 (zinc transporter), member 7                                    |
| 212690_at   | DDHD2     | DDHD2: DDHD domain containing 2                                                                   |
| 202113_s_at | SNX2      | SNX2: sorting nexin 2                                                                             |
| 228343_at   | POU2F2    | POU2F2: POU domain, class 2, transcription factor 2                                               |
| 232024_at   | GIMAP2    | GIMAP2: GTPase, IMAP family member 2                                                              |
| 222662_at   | PPP1R3B   | LOC286044: hypothetical protein LOC286044                                                         |
| 209817_at   | PPP3CB    | PPP3CB: protein phosphatase 3 (formerly 2B), catalytic subunit, beta isoform (calcineurin A beta) |
| 219188_s_at | MACROD1   | LRP16: LRP16 protein                                                                              |
| 217886_at   | EPS15     | EPS15: epidermal growth factor receptor pathway substrate 15                                      |
| 202087_s_at | CTSL1     | CTSL: cathepsin L                                                                                 |
| 217996_at   | PHLDA1    | PHLDA1: pleckstrin homology-like domain, family A, member 1                                       |
| 205067_at   | IL1B      | IL1B: interleukin 1, beta                                                                         |
| 231779_at   | IRAK2     | IRAK2: interleukin-1 receptor-associated kinase 2                                                 |
| 207957_s_at | PRKCB1    | PRKCB1: Protein kinase C, beta 1                                                                  |
| 218277_s_at | DHX40     | DHX40: DEAH (Asp-Glu-Ala-His) box polypeptide 40                                                  |
| 204238_s_at | C6orf108  | C6orf108: chromosome 6 open reading frame 108                                                     |
| 223019_at   | FAM129B   | C9orf88: chromosome 9 open reading frame 88                                                       |
| 202732_at   | PKIG      | PKIG: protein kinase (cAMP-dependent, catalytic) inhibitor gamma                                  |
| 205214_at   | STK17B    | STK17B: serine/threonine kinase 17b (apoptosis-inducing)                                          |
| 202730_s_at | PDCD4     | PDCD4: programmed cell death 4 (neoplastic transformation inhibitor)                              |
| 210517_s_at | AKAP12    | AKAP12: A kinase (PRKA) anchor protein (gravin) 12                                                |
| 217892_s_at | LIMA1     | LIMA1: LIM domain and actin binding 1                                                             |
| 212453_at   | KIAA1279  | KIAA1279: KIAA1279                                                                                |
| 203973_s_at | CEBPD     | CEBPD: CCAAT/enhancer binding protein (C/EBP), delta                                              |
| 203588_s_at | TFDP2     | TFDP2: transcription factor Dp-2 (E2F dimerization partner 2)                                     |
| 208867_s_at | CSNK1A1   | CSNK1A1: casein kinase 1, alpha 1                                                                 |
| 200927_s_at | RAB14     | RAB14: RAB14, member RAS oncogene family                                                          |
| 218616_at   | INTS12    | INTS12: integrator complex subunit 12                                                             |
| 219390_at   | FKBP14    | FKBP14: FK506 binding protein 14, 22 kDa                                                          |
| 205441_at   | OCEL1     | OCEL1: occludin/ELL domain containing 1                                                           |
| 202761_s_at | SYNE2     | SYNE2: spectrin repeat containing, nuclear envelope 2                                             |
| 211537_x_at | MAP3K7    | MAP3K7: mitogen-activated protein kinase kinase kinase 7                                          |
| 225665_at   | ZAK       | ZAK: sterile alpha motif and leucine zipper containing kinase AZK                                 |
| 214620_x_at | PAM       | PAM: peptidylglycine alpha-amidating monooxygenase                                                |
| 224583_at   | COTL1     | COTL1: coactosin-like 1 (Dictyostelium)                                                           |
| 219926_at   | POPDC3    | POPDC3: popeye domain containing 3                                                                |
| 217730_at   | TMBIM1    | TMBIM1: transmembrane BAX inhibitor motif containing 1                                            |
| 235067_at   | MKLN1     | MKLN1: muskelin 1, intracellular mediator containing kelch motifs                                 |
| 218504_at   | FAHD2A    | FAHD2A: fumarylacetoacetate hydrolase domain containing 2A                                        |
| 204875_s_at | GMDS      | GMDS: GDP-mannose 4,6-dehydratase                                                                 |
| 201824_at   | RNF14     | RNF14: ring finger protein 14                                                                     |
| 214083_at   | PPP2R5C   | PPP2R5C: Protein phosphatase 2, regulatory subunit B (B56), gamma isoform                         |
| 229850_at   | FVT1      | Full length insert cDNA clone YX81F03                                                             |
| 201212_at   | LGMN      | LGMN: legumain                                                                                    |
| 221911_at   | ETV1      | ETV1: ets variant gene 1                                                                          |
| 201455_s_at | NPEPPS    | NPEPPS: aminopeptidase puromycin sensitive                                                        |
| 218999_at   | TMEM140   | TMEM140: transmembrane protein 140                                                                |
| 226952_at   | EAF1      | EAF1: ELL associated factor 1                                                                     |
| 202814_s_at | HEXIM1    | HEXIM1: hexamethylene bis-acetamide inducible 1                                                   |
| 203060_s_at | PAPSS2    | PAPSS2: 3'-phosphoadenosine 5'-phosphosulfate synthase 2                                          |
| 235567_at   | LOC283666 | LOC283666: Hypothetical protein LOC283666                                                         |
| 203853_s_at | GAB2      | GAB2: GRB2-associated binding protein 2                                                           |

Suppl. Table 2: A stroma-induced transcriptional signature associated with adverse clinical outcome in Dex-treated myeloma patients

|             |                     |                                                                                                                                                                                                                              |
|-------------|---------------------|------------------------------------------------------------------------------------------------------------------------------------------------------------------------------------------------------------------------------|
| 203665_at   | HMOX1               | HMOX1: heme oxygenase (decycling) 1                                                                                                                                                                                          |
| 221482_s_at | ARPP-19             | ARPP-19: cyclic AMP phosphoprotein, 19 kD                                                                                                                                                                                    |
| 217763_s_at | RAB31               | RAB31: RAB31, member RAS oncogene family                                                                                                                                                                                     |
| 217841_s_at | PPME1               | PPME1: protein phosphatase methylesterase 1                                                                                                                                                                                  |
| 203955_at   | KIAA0649            | KIAA0649: KIAA0649                                                                                                                                                                                                           |
| 226158_at   | KLHL24              | KLHL24: kelch-like 24 (Drosophila)                                                                                                                                                                                           |
| 209118_s_at | TUBA1A              | TUBA3: tubulin, alpha 3                                                                                                                                                                                                      |
| 228573_at   | ---                 | Full-length cDNA clone CS0DD001YA12 of Neuroblastoma Cot 50-normalized of Homo sapiens (human)                                                                                                                               |
| 213944_x_at | GNA11               | NCLN: Nicalin homolog (zebrafish)                                                                                                                                                                                            |
| 200867_at   | ZNF313              | ZNF313: zinc finger protein 313                                                                                                                                                                                              |
| 213418_at   | HSPA6               | HSPA6: heat shock 70kDa protein 6 (HSP70B')                                                                                                                                                                                  |
| 235006_at   | CDKN2AIPNL          | MGC13017: similar to RIKEN cDNA A430101B06 gene                                                                                                                                                                              |
| 236104_at   | ---                 | CDNA FLJ35303 fis, clone PROST2009571                                                                                                                                                                                        |
| 213388_at   | LOC727942           | PDE4DIP: phosphodiesterase 4D interacting protein (myomegalin)                                                                                                                                                               |
| 205552_s_at | OAS1                | OAS1: 2',5'-oligoadenylate synthetase 1, 40/46kDa                                                                                                                                                                            |
| 229287_at   | PCNX                | Full-length cDNA clone CS0DK010YA20 of HeLa cells Cot 25-normalized of Homo sapiens (human)                                                                                                                                  |
| 220199_s_at | C1orf80             | C1orf80: chromosome 1 open reading frame 80                                                                                                                                                                                  |
| 204880_at   | MGMT                | MGMT: O-6-methylguanine-DNA methyltransferase                                                                                                                                                                                |
| 222111_at   | ---                 | CDNA clone IMAGE:4794011                                                                                                                                                                                                     |
| 226725_at   | SLFN5               | Transcribed locus                                                                                                                                                                                                            |
| 225623_at   | KIAA1737            | KIAA1737: KIAA1737                                                                                                                                                                                                           |
| 209394_at   | ASMTL               | ASMTL: acetylserotonin O-methyltransferase-like                                                                                                                                                                              |
| 201185_at   | HTRA1               | HTRA1: HtrA serine peptidase 1                                                                                                                                                                                               |
| 212642_s_at | HIVEP2              | HIVEP2: human immunodeficiency virus type I enhancer binding protein 2                                                                                                                                                       |
| 203871_at   | SENP3               | SENP3: SUMO1/sentrin/SMT3 specific peptidase 3                                                                                                                                                                               |
| 210845_s_at | PLAUR               | PLAUR: plasminogen activator, urokinase receptor                                                                                                                                                                             |
| 219235_s_at | PHACTR4             | PHACTR4: phosphatase and actin regulator 4                                                                                                                                                                                   |
| 229264_at   | LOC642441 /// LOC73 | LOC642441: hypothetical protein LOC642441                                                                                                                                                                                    |
| 204004_at   | PAWR                | PAWR: PRKC, apoptosis, WT1, regulator                                                                                                                                                                                        |
| 226249_at   | SNX30               | SNX30: sorting nexin family member 30                                                                                                                                                                                        |
| 212169_at   | FKBP9               | FKBP9: FK506 binding protein 9, 63 kDa                                                                                                                                                                                       |
| 210299_s_at | FHL1                | FHL1: four and a half LIM domains 1                                                                                                                                                                                          |
| 226022_at   | SASH1               | SASH1: SAM and SH3 domain containing 1                                                                                                                                                                                       |
| 203333_at   | KIFAP3              | KIFAP3: kinesin-associated protein 3                                                                                                                                                                                         |
| 225045_at   | CCDC88A             | KIAA1212: KIAA1212                                                                                                                                                                                                           |
| 202976_s_at | RHOBTB3             | RHOBTB3: Rho-related BTB domain containing 3                                                                                                                                                                                 |
| 201408_at   | PPP1CB              | PPP1CB: protein phosphatase 1, catalytic subunit, beta isoform                                                                                                                                                               |
| 230416_at   | ---                 | Transcribed locus                                                                                                                                                                                                            |
| 200800_s_at | HSPA1A /// HSPA1B   | HSPA1A /// HSPA1B: heat shock 70kDa protein 1A /// heat shock 70kDa protein 1B                                                                                                                                               |
| 214958_s_at | TMC6                | TMC6: transmembrane channel-like 6                                                                                                                                                                                           |
| 218506_x_at | N-PAC               | N-PAC: cytokine-like nuclear factor n-pac                                                                                                                                                                                    |
| 204867_at   | GCHFR               | GCHFR: GTP cyclohydrolase I feedback regulator                                                                                                                                                                               |
| 219045_at   | RHOF                | RHOF: ras homolog gene family, member F (in filopodia)                                                                                                                                                                       |
| 212458_at   | SPRED2              | SPRED2: sprouty-related, EVH1 domain containing 2                                                                                                                                                                            |
| 202856_s_at | SLC16A3             | SLC16A3: solute carrier family 16, member 3 (monocarboxylic acid transporter 4)                                                                                                                                              |
| 244741_s_at | MGC9913             | gb:BE855713 /DB_XREF=gi:10368199 /DB_XREF=7g08d09.x1 /CLONE=IMAGE:3305873 /FEA=EST /CNT=6 /TID=Hs.23133.1 /TIER=ConsEnd /STK=2 /UG=Hs.23133 /UG_TITLE=ESTs, Weakly similar to A33569 alcohol sulfotransferase (R.norvegicus) |
| 219628_at   | ZMAT3               | ZMAT3: zinc finger, matrin type 3                                                                                                                                                                                            |
| 226270_at   | EXOC2               | EXOC2: exocyst complex component 2                                                                                                                                                                                           |
| 202225_at   | ---                 | CDNA FLJ38130 fis, clone D6OST2000464                                                                                                                                                                                        |
| 221882_s_at | TMEM8               | TMEM8: transmembrane protein 8 (five membrane-spanning domains)                                                                                                                                                              |
| 227136_s_at | C10orf46            | C10orf46: Chromosome 10 open reading frame 46                                                                                                                                                                                |
| 204247_s_at | CDK5                | CDK5: cyclin-dependent kinase 5                                                                                                                                                                                              |
| 213256_at   | MARCH3              | MARCH3: membrane-associated ring finger (C3HC4) 3                                                                                                                                                                            |
| 216442_x_at | FN1                 | FN1: fibronectin 1                                                                                                                                                                                                           |
| 213490_s_at | MAP2K2              | MAP2K2: mitogen-activated protein kinase kinase 2                                                                                                                                                                            |
| 224733_at   | CMTM3               | CMTM3: CKLF-like MARVEL transmembrane domain containing 3                                                                                                                                                                    |

Suppl. Table 2: A stroma-induced transcriptional signature associated with adverse clinical outcome in Dex-treated myeloma patients

|             |           |                                                                                                                                                 |
|-------------|-----------|-------------------------------------------------------------------------------------------------------------------------------------------------|
| 203348_s_at | ETV5      | ETV5: ets variant gene 5 (ets-related molecule)                                                                                                 |
| 221563_at   | DUSP10    | DUSP10: dual specificity phosphatase 10                                                                                                         |
| 36554_at    | ASMTL     | ASMTL: acetylserotonin O-methyltransferase-like                                                                                                 |
| 209206_at   | SEC22B    | SEC22B: SEC22 vesicle trafficking protein homolog B ( <i>S. cerevisiae</i> )                                                                    |
| 214844_s_at | DOK5      | DOK5: docking protein 5                                                                                                                         |
| 218849_s_at | PPP1R13L  | PPP1R13L: protein phosphatase 1, regulatory (inhibitor) subunit 13 like                                                                         |
| 205193_at   | MAFF      | MAFF: v-maf musculoaponeurotic fibrosarcoma oncogene homolog F (avian)                                                                          |
| 217762_s_at | RAB31     | RAB31: RAB31, member RAS oncogene family                                                                                                        |
| 202748_at   | GBP2      | GBP2: guanylate binding protein 2, interferon-inducible /// guanylate binding protein 2, interferon-inducible                                   |
| 243278_at   | FOXP2     | FOXP2: Forkhead box P2                                                                                                                          |
| 203879_at   | PIK3CD    | PIK3CD: phosphoinositide-3-kinase, catalytic, delta polypeptide /// phosphoinositide-3-kinase, catalytic, delta polypeptide                     |
| 204212_at   | ACOT8     | ACOT8: acyl-CoA thioesterase 8                                                                                                                  |
| 213045_at   | MAST3     | MAST3: microtubule associated serine/threonine kinase 3                                                                                         |
| 212348_s_at | AOF2      | AOF2: amine oxidase (flavin containing) domain 2                                                                                                |
| 235428_at   | ---       | LOC642405: Hypothetical protein LOC642405                                                                                                       |
| 202806_at   | DBN1      | DBN1: drebrin 1                                                                                                                                 |
| 203935_at   | ACVR1     | ACVR1: activin A receptor, type I                                                                                                               |
| 206472_s_at | TLE3      | TLE3: transducin-like enhancer of split 3 ( <i>E(sp1)</i> homolog, <i>Drosophila</i> )                                                          |
| 202500_at   | DNAJB2    | DNAJB2: DnaJ (Hsp40) homolog, subfamily B, member 2                                                                                             |
| 227943_at   | ---       | gb:AI798680/DB_XREF=gi:5364152/DB_XREF=we91d01.x1/CLONE=IMAGE:2348449/FEA=EST/CNT=31/TID=Hs.25933.0/TIER=Stack/STK=19/UG=Hs.25933/UG TITLE=ESTs |
| 205633_s_at | ALAS1     | ALAS1: aminolevulinate, delta-, synthase 1                                                                                                      |
| 201075_s_at | SMARCC1   | SMARCC1: SWI/SNF related, matrix associated, actin dependent regulator of chromatin, subfamily c, member 1                                      |
| 225774_at   | RSPRY1    | RSPRY1: ring finger and SPRY domain containing 1                                                                                                |
| 209566_at   | INSIG2    | INSIG2: insulin induced gene 2                                                                                                                  |
| 201760_s_at | WSB2      | WSB2: WD repeat and SOCS box-containing 2                                                                                                       |
| 212233_at   | MAP1B     | 3'UTR of hypothetical protein (ORF1)                                                                                                            |
| 222065_s_at | FLII      | FLII: flightless I homolog ( <i>Drosophila</i> )                                                                                                |
| 217549_at   | ---       | Transcribed locus, strongly similar to NP_848718.1 mitochondrial ribosomal protein L50 [ <i>Mus musculus</i> ]                                  |
| 218368_s_at | TNFRSF12A | TNFRSF12A: tumor necrosis factor receptor superfamily, member 12A                                                                               |
| 237203_at   | ---       | Homo sapiens, clone IMAGE:4214313, mRNA                                                                                                         |
| 207630_s_at | CREM      | CREM: cAMP responsive element modulator                                                                                                         |
| 211979_at   | GPR107    | GPR107: G protein-coupled receptor 107                                                                                                          |
| 201017_at   | EIF1AX    | EIF1AX: eukaryotic translation initiation factor 1A, X-linked                                                                                   |
| 206580_s_at | EFEMP2    | EFEMP2: EGF-containing fibulin-like extracellular matrix protein 2                                                                              |
| 221752_at   | SSH1      | SSH1: Slingshot homolog 1 ( <i>Drosophila</i> )                                                                                                 |
| 202262_x_at | DDAH2     | DDAH2: dimethylarginine dimethylaminohydrolase 2                                                                                                |
| 212253_x_at | DST       | DST: dystonin                                                                                                                                   |
| 214264_s_at | C14orf143 | C14orf143: chromosome 14 open reading frame 143                                                                                                 |
| 209085_x_at | RFC1      | RFC1: replication factor C (activator 1) 1, 145kDa                                                                                              |
| 209538_at   | ZNF32     | ZNF32: zinc finger protein 32                                                                                                                   |
| 217821_s_at | WBP11     | WBP11: WW domain binding protein 11                                                                                                             |
| 218645_at   | ZNF277    | ZNF277: zinc finger protein 277                                                                                                                 |
| 219060_at   | C8orf32   | C8orf32: chromosome 8 open reading frame 32                                                                                                     |
| 213397_x_at | RNASE4    | RNASE4: ribonuclease, RNase A family, 4                                                                                                         |
| 201261_x_at | BGN       | BGN: biglycan                                                                                                                                   |
| 209409_at   | GRB10     | GRB10: growth factor receptor-bound protein 10                                                                                                  |
| 218582_at   | MARCH5    | MARCH5: membrane-associated ring finger (C3HC4) 5                                                                                               |
| 225946_at   | RASSF8    | RASSF8: Ras association (RalGDS/AF-6) domain family 8                                                                                           |
| 226695_at   | PRRX1     | PRRX1: paired related homeobox 1                                                                                                                |
| 209365_s_at | ECM1      | ECM1: extracellular matrix protein 1                                                                                                            |
| 208869_s_at | GABARAPL1 | GABARAPL1: GABA(A) receptor-associated protein like 1                                                                                           |
| 202472_at   | MPI       | MPI: mannose phosphate isomerase                                                                                                                |
| 204824_at   | ENDOG     | ENDOG: endonuclease G                                                                                                                           |
| 201932_at   | LRR41     | LRR41: leucine rich repeat containing 41                                                                                                        |
| 204809_at   | CLPX      | CLPX: ClpX caseinolytic peptidase X homolog ( <i>E. coli</i> )                                                                                  |

Suppl. Table 2: A stroma-induced transcriptional signature associated with adverse clinical outcome in Dex-treated myeloma patients

|             |        |                                                                     |
|-------------|--------|---------------------------------------------------------------------|
| 217901_at   | DSG2   | DSG2: Desmoglein 2                                                  |
| 205453_at   | HOXB2  | HOXB2: homeobox B2                                                  |
| 201798_s_at | FER1L3 | FER1L3: fer-1-like 3, myoferlin (C. elegans)                        |
| 223345_at   | HDAC8  | HDAC8: histone deacetylase 8                                        |
| 209311_at   | BCL2L2 | BCL2L2: BCL2-like 2                                                 |
| 221547_at   | PRPF18 | PRPF18: PRP18 pre-mRNA processing factor 18 homolog (S. cerevisiae) |
